# Supplementary material for: Sixty Years of Placebo-Controlled Antipsychotic Drug Trials in Acute Schizophrenia: Systematic Review, Bayesian Meta-Analysis, and Meta-Regression of Efficacy Predictors
Source: Atypon-hosted journal article supplement (doi:10.1176/appi.ajp.2017.16121358), 2017-05-25

## **Content of supplemental material**

**Supplementary Table S1 – PRISMA checklist (page 1-3)**

**Supplementary Table S2 – Protocol (page 4-24)**

**Supplementary Table S3 – Search strategy (page 25-38)**

**Supplementary Figure S1 – PRISMA diagram (page 39-42)**

**Supplementary Table S4 – Table of included studies (page 43-63)**

**Supplementary Table S5 - Risk of bias assessment (page 64-70)**

**Supplementary Table S6 – Results of individual response criteria and odds ratios (page 71-73)**

**Supplementary Figure S2 – Results of single drugs (page 74-89)**

**Supplementary Figure S3 – Results of single studies (page 90-104)**

**Supplementary Table S7 – Sensitivity analysis of multivariable meta-regression (page 105-108)**

**Supplementary Table S8 – Re-analysis of Rutherford et al. 2014 (page 109-116)**

**Supplementary Figure S4 – Association between publication year and sample size (page 117-118)**

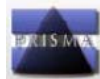

## Supplementary Table S1: PRISMA Checklist

| Section/topic                      | #  | Checklist item                                                                                                                                                                                                                                                                                              | Reported on page # |
|------------------------------------|----|-------------------------------------------------------------------------------------------------------------------------------------------------------------------------------------------------------------------------------------------------------------------------------------------------------------|--------------------|
| <b>TITLE</b>                       |    |                                                                                                                                                                                                                                                                                                             |                    |
| Title                              | 1  | Identify the report as a systematic review, meta-analysis, or both.                                                                                                                                                                                                                                         | 1                  |
| <b>ABSTRACT</b>                    |    |                                                                                                                                                                                                                                                                                                             |                    |
| Structured summary                 | 2  | Provide a structured summary including, as applicable: background; objectives; data sources; study eligibility criteria, participants, and interventions; study appraisal and synthesis methods; results; limitations; conclusions and implications of key findings; systematic review registration number. | 3                  |
| <b>INTRODUCTION</b>                |    |                                                                                                                                                                                                                                                                                                             |                    |
| Rationale                          | 3  | Describe the rationale for the review in the context of what is already known.                                                                                                                                                                                                                              | 4-5                |
| Objectives                         | 4  | Provide an explicit statement of questions being addressed with reference to participants, interventions, comparisons, outcomes, and study design (PICOS).                                                                                                                                                  | 5ff                |
| <b>METHODS</b>                     |    |                                                                                                                                                                                                                                                                                                             |                    |
| Protocol and registration          | 5  | Indicate if a review protocol exists, if and where it can be accessed (e.g., Web address), and, if available, provide registration information including registration number.                                                                                                                               | 5                  |
| Eligibility criteria               | 6  | Specify study characteristics (e.g., PICOS, length of follow-up) and report characteristics (e.g., years considered, language, publication status) used as criteria for eligibility, giving rationale.                                                                                                      | 5ff                |
| Information sources                | 7  | Describe all information sources (e.g., databases with dates of coverage, contact with study authors to identify additional studies) in the search and date last searched.                                                                                                                                  | 6-7                |
| Search                             | 8  | Present full electronic search strategy for at least one database, including any limits used, such that it could be repeated.                                                                                                                                                                               | 7 and Table S3     |
| Study selection                    | 9  | State the process for selecting studies (i.e., screening, eligibility, included in systematic review, and, if applicable, included in the meta-analysis).                                                                                                                                                   | 7, 10, Figure S1   |
| Data collection process            | 10 | Describe method of data extraction from reports (e.g., piloted forms, independently, in duplicate) and any processes for obtaining and confirming data from investigators.                                                                                                                                  | 6, 7               |
| Data items                         | 11 | List and define all variables for which data were sought (e.g., PICOS, funding sources) and any assumptions and simplifications made.                                                                                                                                                                       | 7, 8, 9            |
| Risk of bias in individual studies | 12 | Describe methods used for assessing risk of bias of individual studies (including specification of whether this was done at the study or outcome level), and how this information is to be used in any data synthesis.                                                                                      | 6                  |



## Supplementary Table S1: PRISMA Checklist

|                      |    |                                                                                                                                                           |     |
|----------------------|----|-----------------------------------------------------------------------------------------------------------------------------------------------------------|-----|
| Summary measures     | 13 | State the principal summary measures (e.g., risk ratio, difference in means).                                                                             | 8   |
| Synthesis of results | 14 | Describe the methods of handling data and combining results of studies, if done, including measures of consistency (e.g., $I^2$ ) for each meta-analysis. | 8-9 |

Page 1 of 2

| Section/topic                 | #  | Checklist item                                                                                                                                                                                           | Reported on page #                 |
|-------------------------------|----|----------------------------------------------------------------------------------------------------------------------------------------------------------------------------------------------------------|------------------------------------|
| Risk of bias across studies   | 15 | Specify any assessment of risk of bias that may affect the cumulative evidence (e.g., publication bias, selective reporting within studies).                                                             | 6, 10                              |
| Additional analyses           | 16 | Describe methods of additional analyses (e.g., sensitivity or subgroup analyses, meta-regression), if done, indicating which were pre-specified.                                                         | 9-10 and protocol in Table S2      |
| <b>RESULTS</b>                |    |                                                                                                                                                                                                          |                                    |
| Study selection               | 17 | Give numbers of studies screened, assessed for eligibility, and included in the review, with reasons for exclusions at each stage, ideally with a flow diagram.                                          | PRISMA diagram in Figure S1        |
| Study characteristics         | 18 | For each study, present characteristics for which data were extracted (e.g., study size, PICOS, follow-up period) and provide the citations.                                                             | Included studies table in Table S4 |
| Risk of bias within studies   | 19 | Present data on risk of bias of each study and, if available, any outcome level assessment (see item 12).                                                                                                | Risk of bias summary in Table S5   |
| Results of individual studies | 20 | For all outcomes considered (benefits or harms), present, for each study: (a) simple summary data for each intervention group (b) effect estimates and confidence intervals, ideally with a forest plot. | Figure S2                          |
| Synthesis of results          | 21 | Present results of each meta-analysis done, including confidence intervals and measures of consistency.                                                                                                  | 11-12, Figure S3, Figures_1-5      |
| Risk of bias across studies   | 22 | Present results of any assessment of risk of bias across studies (see Item 15).                                                                                                                          | Risk of bias graph in Table        |

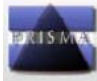

## Supplementary Table S1: PRISMA Checklist

|                     |    |                                                                                                                                                                                      |                      |
|---------------------|----|--------------------------------------------------------------------------------------------------------------------------------------------------------------------------------------|----------------------|
|                     |    |                                                                                                                                                                                      | S5                   |
| Additional analysis | 23 | Give results of additional analyses, if done (e.g., sensitivity or subgroup analyses, meta-regression [see Item 16]).                                                                | 12-13,<br>Tables 1-3 |
| <b>DISCUSSION</b>   |    |                                                                                                                                                                                      |                      |
| Summary of evidence | 24 | Summarize the main findings including the strength of evidence for each main outcome; consider their relevance to key groups (e.g., healthcare providers, users, and policy makers). | 20                   |
| Limitations         | 25 | Discuss limitations at study and outcome level (e.g., risk of bias), and at review-level (e.g., incomplete retrieval of identified research, reporting bias).                        | 20                   |
| Conclusions         | 26 | Provide a general interpretation of the results in the context of other evidence, and implications for future research.                                                              | 14-20                |
| <b>FUNDING</b>      |    |                                                                                                                                                                                      |                      |
| Funding             | 27 | Describe sources of funding for the systematic review and other support (e.g., supply of data); role of funders for the systematic review.                                           | 2                    |

From: Moher D, Liberati A, Tetzlaff J, Altman DG, The PRISMA Group (2009). Preferred Reporting Items for Systematic Reviews and Meta-Analyses: The PRISMA Statement. PLoS Med 6(6): e1000097. doi:10.1371/journal.pmed1000097

For more information, visit: [www.prisma-statement.org](http://www.prisma-statement.org).

## **Supplementary Table S2**

### **Protocol**

## Review title and timescale

### 1 Review title

Give the working title of the review. This must be in English. Ideally it should state succinctly the interventions or exposures being reviewed and the associated health or social problem being addressed in the review.

[Has the antipsychotic drug efficacy in schizophrenia decreased over the last 60 years and why? Bayesian meta-analysis and meta-regression](#)

### 2 Original language title

For reviews in languages other than English, this field should be used to enter the title in the language of the review. This will be displayed together with the English language title.

### 3 Anticipated or actual start date

Give the date when the systematic review commenced, or is expected to commence.

[01/09/2012](#)

### 4 Anticipated completion date

Give the date by which the review is expected to be completed.

[31/08/2014](#)

### 5 Stage of review at time of this submission

Indicate the stage of progress of the review by ticking the relevant boxes. Reviews that have progressed beyond the point of completing data extraction at the time of initial registration are not eligible for inclusion in PROSPERO. This field should be updated when any amendments are made to a published record.

| <b>Review stage</b>                                             | <b>Started</b>      | <b>Completed</b>   |
|-----------------------------------------------------------------|---------------------|--------------------|
| Preliminary searches                                            | <a href="#">Yes</a> | <a href="#">No</a> |
| Piloting of the study selection process                         | <a href="#">Yes</a> | <a href="#">No</a> |
| Formal screening of search results against eligibility criteria | <a href="#">No</a>  | <a href="#">No</a> |
| Data extraction                                                 | <a href="#">No</a>  | <a href="#">No</a> |
| Risk of bias (quality) assessment                               | <a href="#">No</a>  | <a href="#">No</a> |
| Data analysis                                                   | <a href="#">No</a>  | <a href="#">No</a> |
| Prospective meta-analysis                                       | <a href="#">No</a>  | <a href="#">No</a> |

Provide any other relevant information about the stage of the review here.

## Review team details

### 6 Named contact

The named contact acts as the guarantor for the accuracy of the information presented in the register record.

[Stefan Leucht](#)

### 7 Named contact email

Enter the electronic mail address of the named contact.

[stefan.leucht@lrz.tum.de](mailto:stefan.leucht@lrz.tum.de)

### 8 Named contact address

Enter the full postal address for the named contact.

[Klinik fuer Psychiatrie und Psychotherapie der TU-Muenchen Klinikum rechts der Isar  
Ismaningerstr. 22 81675 Muenchen Germany](#)

### 9 Named contact phone number

Enter the telephone number for the named contact, including international dialing code.

[+498941404249](#)

### 10 Organisational affiliation of the review

Full title of the organisational affiliations for this review, and website address if available. This field may be completed as 'None' if the review is not affiliated to any organisation.

[Department of Psychiatry and Psychotherapy, Technische Universität München, Klinikum rechts der Isar](#)

Website address:

<http://www.cfdm.de/>

### 11 Review team members and their organisational affiliations

Give the title, first name and last name of all members of the team working directly on the review. Give the organisational affiliations of each member of the review team.

| Title     | First name | Last name | Affiliation                                                                                          |
|-----------|------------|-----------|------------------------------------------------------------------------------------------------------|
| Professor | Stefan     | Leucht    | Department of Psychiatry and Psychotherapy, Technische Universität München, Klinikum rechts der Isar |
| Mr        | Maximilian | Huhn      | Department of Psychiatry and Psychotherapy, Technische Universität München, Klinikum rechts der Isar |
| Dr        | Myrto      | Samara    | Department of Psychiatry and Psychotherapy, Technische Universität München, Klinikum rechts der Isar |
| Dr        | Claudia    | Leucht    | Department of Psychiatry and Psychotherapy, Technische Universität München, Klinikum rechts der Isar |
| Dr        | Markus     | Dold      | Department of Psychiatry and Psychotherapy, Technische Universität                                   |

|           |          |        |                                                                                                      |
|-----------|----------|--------|------------------------------------------------------------------------------------------------------|
|           |          |        | München, Klinikum rechts der Isar                                                                    |
| Ms        | Magdolna | Tardy  | Department of Psychiatry and Psychotherapy, Technische Universität München, Klinikum rechts der Isar |
| Ms        | Sarah    | Longhi | Department of Psychiatry and Psychotherapy, Technische Universität München, Klinikum rechts der Isar |
| Professor | John     | Davis  | Department of Psychiatry and Psychotherapy, University of Illinois at Chicagots der Isar             |

**12 Funding sources/sponsors**

Give details of the individuals, organizations, groups or other legal entities who take responsibility for initiating, managing, sponsoring and/or financing the review. Any unique identification numbers assigned to the review by the individuals or bodies listed should be included.

Bundesministerium für Bildung und Forschung (BMBF) Grant: 01K61115

**13 Conflicts of interest**

List any conditions that could lead to actual or perceived undue influence on judgements concerning the main topic investigated in the review.

Are there any actual or potential conflicts of interest?

Yes

In the last three years Stefan Leucht has received honoraria for consulting/advisory boards from Alkermes, BristolMyersSquibb, EliLilly, Janssen, Johnson&Johnson, Lundbeck, Medavante, Roche, lecture honoraria from AstraZeneca, BristolMyersSquibb, EliLilly, EssexPharma, Janssen, Johnson&Johnson, Lundbeck, Pfizer, SanofiAventis, and EliLilly has provided medication for a trial with Stefan Leucht as the primary investigator. Markus Dold has received a travel grant fram Janssen. Claudia Leucht is Stefan Leucht's spouse so that the same conflict of interest may also relate to her.

**14 Collaborators**

Give the name, affiliation and role of any individuals or organisations who are working on the review but who are not listed as review team members.

| <b>Title</b> | <b>First name</b> | <b>Last name</b> | <b>Organisation details</b>                                    |
|--------------|-------------------|------------------|----------------------------------------------------------------|
| Professor    | Georgia           | Salanti          | Department of Hygiene and Epidemiology, University of Ioannina |



## Review methods

### 15 Review question(s)

State the question(s) to be addressed / review objectives. Please complete a separate box for each question.

To provide a Bayesian model systematic review and meta-analysis of the efficacy of antipsychotic drugs compared to placebo in schizophrenia and to identify factors that moderate drug-placebo differences by meta-regression.

### 16 Searches

Give details of the sources to be searched, and any restrictions (e.g. language or publication period). The full search strategy is not required, but may be supplied as a link or attachment.

1. Electronic searches: We will search the 'Cochrane Schizophrenia Group Trials Register' for relevant studies. This register is compiled by regular methodical searches in numerous electronic databases (BIOSIS, CINAHL, Dissertation Abstracts, EMBASE, LILACS, MEDLINE, PSYINDEX, PsycINFO, RUSSMED, Sociofile), supplemented by the regular hand searching of relevant journals and numerous conference proceedings (for details see the description of the Cochrane Schizophrenia Group. The register contains controlled clinical trials on people with schizophrenia. The search term will be "placebo" using the following fields: title, abstract, key words or index terms. 2. Previous reviews: We will search previous reviews and Cochrane Reviews on single drugs. 3. Personal contact: We will contact the first author of each included study published in the last 30 years for missing information. 4. Drug companies: We will contact the manufacturers of the antipsychotic drugs and ask them for further relevant studies and for missing information on identified studies. There will be no extra hand search for this review, because a number of psychiatric journals (especially old issues which are important for this project) and the abstract books of major conferences are regularly hand searched anyways for the 'Cochrane Schizophrenia Group Trials Register'.

### 17 URL to search strategy

If you have one, give the link to your search strategy here. Alternatively you can e-mail this to PROSPERO and we will store and link to it.

### 18 Condition or domain being studied

Give a short description of the disease, condition or healthcare domain being studied. This could include health and wellbeing outcomes.

Schizophrenia

### 19 Participants/population

Give summary criteria for the participants or populations being studied by the review. The preferred format includes details of both inclusion and exclusion criteria.

People with schizophrenia or related disorders (schizoaffective- or schizophreniform disorder). We will include adult people (age = 18, no upper age limit, no restriction in setting, gender, ethnicity) with schizophrenia, schizophreniform or schizoaffective disorders with an acute exacerbation, primarily irrespective of the diagnostic criteria used. There is no clear evidence that the latter schizophrenia-like psychoses are caused by fundamentally different disease processes or require different treatment approaches. It is also a general strategy of the Cochrane Schizophrenia Group to include not only studies that used specific diagnostic criteria such as ICD-10 or DSM-IV, because these criteria are not meticulously used in clinical routine either. Nevertheless, the diagnostic criteria applied will be examined as a moderator factor. Studies in which less than 20% of the participants were suffering from other psychiatric disorders (e.g. depression or mental retardation) will be included. We will exclude studies in participants with no or only subclinical symptoms at baseline that are usually conducted to address the relapse preventing effects of antipsychotics, studies in patients with predominant negative symptoms and studies including exclusively participants with major concomitant somatic illness or psychiatric disorders (e.g. substance abuse).

## 20 **Intervention(s), exposure(s)**

Give full and clear descriptions of the nature of the interventions or the exposures to be reviewed

Antipsychotic drugs It should be noted that according to all major treatment guidelines there is no major difference in the efficacy between the available antipsychotics (except for clozapine which will thus be excluded) justifying the inclusion of all major antipsychotic drugs. Nevertheless, the individual antipsychotic used will be a factor in the statistical analysis. We will include all antipsychotics as long as they are available in at least one country. We will include all these compounds in any oral form of administration (tablets or liquid), while depot medications are mainly used for relapse prevention and will therefore be excluded. We will include all studies with flexible doses, because here the doctor has the possibility to titrate the dose for the individual patient. In fixed doses studies we will only include target to maximum doses as suggested by an international consensus study (Gardner et al., American Journal of Psychiatry 2010, 167 (6): 686-693).

## 21 **Comparator(s)/control**

Where relevant, give details of the alternatives against which the main subject/topic of the review will be compared (e.g. another intervention or a non-exposed control group).

The comparator will be placebo (active or inactive).

## 22 **Types of study to be included initially**

Give details of the study designs to be included in the review. If there are no restrictions on the types of study design eligible for inclusion, this should be stated.

Design of primary studies: randomized, controlled, double-blind trials. Study quality will be assessed with the risk of bias tool described in the Cochrane Collaboration Handbook. This tool encourages consideration of how the sequence was generated, how allocation was concealed, the integrity of blinding at outcome, the completeness of outcome data, selective reporting and other biases. We will not include studies where sequence generation was at high risk of bias (e.g. randomization by the date of birth or day of the week) or where allocation was clearly not concealed. We will also only include double-blind studies because we recently showed that non-blinded studies can exaggerate differences between treatments in this area. The minimum duration of follow-up will be 3 weeks.

## 23 **Context**

Give summary details of the setting and other relevant characteristics which help define the inclusion or exclusion criteria.

We will include adult people (age = 18, no upper age limit, no restriction in setting, gender, ethnicity) with schizophrenia, schizophreniform or schizoaffective disorders with an acute exacerbation, primarily irrespective of the diagnostic criteria used. There is no clear evidence that the latter schizophrenia-like psychoses are caused by fundamentally different disease processes or require different treatment approaches. It is also a general strategy of the Cochrane Schizophrenia Group to include not only studies that used specific diagnostic criteria such as ICD-10 or DSM-IV, because these criteria are not meticulously used in clinical routine either. Nevertheless, the diagnostic criteria applied will be examined as a moderator factor. Studies in which less than 20% of the participants were suffering from other psychiatric disorders (e.g. depression or mental retardation) will be included. We will exclude studies in participants with no or only subclinical symptoms at baseline that are usually conducted to address the relapse preventing effects of antipsychotics, studies in patients with predominant negative symptoms and studies including exclusively participants with major concomitant somatic illness or psychiatric disorders (e.g. substance abuse).

## 24 **Primary outcome(s)**

Give the most important outcomes.

Outcomes: Mean reduction in overall symptoms of schizophrenia, response to treatment

Give information on timing and effect measures, as appropriate.

The minimum duration of follow-up will be 3 weeks and we will always use endpoint data. We

will group the results according to time (3- 12 weeks (primary outcome), medium-term 13-26 weeks and long-term > 26 weeks). In the case of cross-over studies we will use only the first cross-over phase to avoid the problem of carry-over effects. 1. The primary outcome will be overall symptoms of schizophrenia as measured by rating scales such as the Positive and Negative Syndrome Scale (PANSS), the Brief Psychiatric Rating Scale (BPRS - ) or of any other validated scale (e.g. the Manchester Scale) for the assessment of overall schizophrenic symptomatology. Overall symptoms of schizophrenia as measured by such scales was the primary outcome in numerous previous systematic reviews. As not all studies will have used the same scale, we will apply the following hierarchy: mean change of the PANSS total score from baseline to endpoint, if not available mean change of the BPRS, or if again not available the mean values at endpoint of the PANSS/ BPRS. The results of other rating scales will only be used if the instrument has been published in a peer-reviewed journal, because it has been shown that unvalidated schizophrenia scales exaggerate differences. 2. Clinically important response to treatment. We will consider the following definitions of clinically important response in descending order: at least 50% reduction of the baseline score of the PANSS, 50% reduction of the BPRS or 50% reduction of any other global schizophrenia rating scale, at least much improved (score of 2) on the Clinical Global Impressions-Improvement Scale (CGI). We showed in a validation study that 50% PANSS/BPRS reduction and a CGI of 2 describe a similar degree of response which is clinically meaningful. But if none of these definitions is available, we will use the original authors' primary definition.

## 25 Secondary outcomes

List any additional outcomes that will be addressed. If there are no secondary outcomes enter None.

Dropouts: 1. Dropout due to any reason 2. Dropouts due to inefficacy of treatment 3. Dropouts due to side-effects.

Give information on timing and effect measures, as appropriate.

The minimum duration of follow-up will be 3 weeks and we will always use endpoint data. We will group the results according to time (3- 12 weeks (primary outcome), medium-term 13-26 weeks and long-term > 26 weeks). In the case of cross-over studies we will use only the first cross-over phase to avoid the problem of carry-over effects.

## 26 Data extraction, (selection and coding)

Give the procedure for selecting studies for the review and extracting data, including the number of researchers involved and how discrepancies will be resolved. List the data to be extracted.

1. Selection of trials: Two reviewers will independently inspect all abstracts identified in the searches. Disagreement will be resolved by discussion, and where doubt still remains, we will acquire the full article for further inspection. Once the full articles are obtained, at least two reviewers will independently decide whether the studies meet the review criteria. If disagreement can not be resolved by discussion, we will resolve it with a third reviewer or seek further information from the study authors. 2. Data extraction: Two reviewers will independently extract data from all selected trials on simple, standard forms. When disagreement arises we will resolve it by discussion with a third reviewer. Where this is not possible we will contact the study authors.

## 27 Risk of bias (quality) assessment

State whether and how risk of bias will be assessed, how the quality of individual studies will be assessed, and whether and how this will influence the planned synthesis.

Study quality in terms of sequence generation, allocation concealment, blinding, the completeness of outcome data, selective reporting and other biases will be assessed with the Cochrane Collaboration risk of bias tool.

## 28 Strategy for data synthesis

Give the planned general approach to be used, for example whether the data to be used will be aggregate or at the level of individual participants, and whether a quantitative or narrative (descriptive) synthesis is planned. Where appropriate a brief outline of analytic approach should be given.

In general we will use Bayesian methods to estimate the summary effect size using a random effects model, but a fixed effects model will be used in a sensitivity analysis. Bayesian methodology is most appropriate for synthesis of complex data as in our meta-analysis. Effect sizes of the individual studies: 1. Continuous outcomes: The effect size measure for continuous outcomes will be the standardized mean difference (SMD), calculated as Hedges's  $g$ , because we expect the studies to use different rating scales of overall schizophrenia symptomatology (mainly the PANSS or the BPRS). SMDs will be calculated for both: a) differences between drug and placebo b) the change from baseline to endpoint in the placebo group only. The latter analyses will be carried out to analyse placebo response in antipsychotic drug trials. Intention-to-treat (ITT) data will be used whenever available. If mixed-effect model repeated measure (MMRM) is available we prefer it to last observation carried forward (LOCF). Missing standard deviations: When standard errors instead of standard deviations (SD) are presented, the former will be converted to standard deviations. If both are missing and can not be obtained from the authors we will estimate SDs from confidence intervals or p-values as described in Section 7.7.3 of the Cochrane Handbook for Systematic Reviews of Interventions or we will use the mean SD of the other studies. 2. Dichotomous outcomes: The effect size for dichotomous outcomes will be the odds ratio (OR) and its 95% confidence interval (CI). The main reason to prefer odds ratios to relative risks is that a major focus of the current analysis is the identification of factors moderating drug-placebo differences. We expect that different definitions of 'response to treatment' will be used and in such a situation the odds ratio has been shown to yield the most consistent results which are largely independent from the response cut-off used. Therefore, although the relative risk is more intuitive for clinicians, the odds ratio has clear advantages for the purpose of our review. We will again carry out an intention to treat analysis ('once randomized always analyse'). Everyone allocated to the intervention will be counted, whether they completed the follow up or not. If the authors applied such a strategy, we will use their results. If the original authors presented only the results of the per-protocol or completer population, we will assume that those participants lost to follow-up would not have responded (conservative approach). 3. Publication bias: We will examine potential publication bias by 'contour enhanced funnel-plots'. The problem of conventional statistical tests to analyse funnel-plot asymmetry such as that by Egger et al. is that they can not distinguish between asymmetry that is due to publication bias and asymmetry that is due to other factors such as heterogeneity or lower quality of small trials. In 'contour enhanced funnel-plots' 'contour lines representing conventional significance levels (e.g. p-values <0.01, <0.05) are drawn in the funnel plot. If missing studies are found in areas of statistical non-significance this indicates that the source of funnel plot asymmetry is publication bias rather than other possible factors.

## 29 Analysis of subgroups or subsets

Give any planned exploration of subgroups or subsets within the review. 'None planned' is a valid response if no subgroup analyses are planned.

The following potential effect moderators will be explored by subgroup or meta-regression analysis: 1. Chronicity of the patients: Chronic patients are thought to respond worse than patients with a recent onset of their illness. 2. First episode patients 3. Percentage women: women might have a better outcome than men. 4. Duration of the current episode: acutely ill patients who are treated early after the start of their episode are thought to respond better to medication. 5. Severity of illness at baseline: there may be floor effects that limit drug-placebo differences in less severely ill populations. 6. Diagnostic criteria: The diagnostic criteria used before the 10th Version of the International Classification of Diseases (ICD-10) or the 3rd version of the Diagnostic and Statistical Manual (DSM-III) or the Feighner criteria or the Research Diagnostic Criteria were not operationalised. Therefore, studies using earlier criteria may have included participants that would nowadays not be diagnosed as suffering from schizophrenia. The use of DSM-III/III-R/IV/IV-R, ICD-10, Research Diagnostic Criteria or Feighner Criteria versus earlier, not operationalised criteria will therefore be analysed. 7. The antipsychotic drug used: all guidelines state that except for clozapine which is excluded from our analysis the efficacy of all antipsychotic drugs is the same. Nevertheless, to control for the effects of specific antipsychotics, drug will be included in the model. 8. Trial quality in terms of randomization, allocation and blinding as measured by the 'risk of bias tool', because shortcomings in these domains lead to overestimation of effects. 9. Duration of wash-out period: carry-over effects from pre-trial treatment may reduce drug-placebo differences in the case of short wash-out phases. 10. Sample sizes and number of sites: due to apparently decreasing drug-placebo differences more participants have been recruited in recent trials making more

sites necessary. Paradoxically, this can increase inter-rater variability and thus decrease effect sizes as it was shown for mania trials. 11. Two-arm (antipsychotic versus placebo) versus three-arm (new antipsychotic versus standard antipsychotic versus placebo) design: In depression trials two-arm studies had higher drug-placebo differences than three arm studies which was explained by a better blinding in a three-arm trial. 12. Study duration: it takes some time until antipsychotics develop their full effects, therefore, longer trials should yield higher drug-placebo differences. 13. Percentage of participants randomized to placebo group. In depression, studies with smaller percentage randomized to placebo found smaller drug-placebo differences. This was interpreted by expectancy effects. If the raters can expect that most patients receive active treatment, placebo response may increase and drug-placebo differences decrease. 14. Publication year: It seems that effect-sizes have become smaller over time. 15. Medication dose: medication doses will be converted to chlorpromazine equivalents according to international consensus for this assessment. 16. Fixed or flexible medication dose 17. Sponsor (industry or public): 'industry bias' could inflate effect sizes. 18. Intention-to-treat analysis or not: we would hypothesize that the effects in ITT (once randomized – always analyse) analyses are smaller than in per protocol analyses. Sensitivity analyses: We plan a priori to carry out sensitivity analyses excluding completer analyses and to apply a fixed-effects instead of a random effects model.

## Review general information

### 30 Type of review

Select the type of review from the drop down list.

Treatment

### 31 Language

Select the language(s) in which the review is being written and will be made available, from the drop down list. Use the control key to select more than one language.

English

Will a summary/abstract be made available in English?

Yes

### 32 Country

Select the country in which the review is being carried out from the drop down list. For multi-national collaborations select all the countries involved. Use the control key to select more than one country.

Germany

### 33 Other registration details

List places where the systematic review title or protocol is registered (such as with The Campbell Collaboration, or The Joanna Briggs Institute). The name of the organisation and any unique identification number assigned to the review by that organization should be included.

### 34 Reference and/or URL for published protocol

Give the citation for the published protocol, if there is one.

Give the link to the published protocol, if there is one. This may be to an external site or to a protocol deposited with CRD in pdf format.

### 35 Dissemination plans

Give brief details of plans for communicating essential messages from the review to the appropriate audiences.

The results will be published in major psychiatric journals and presented at major international and German psychiatric conferences. Our findings will be rapidly implemented in national and international treatment guidelines, for some of which Stefan Leucht is a co-author. The potential economic impact is that health care costs are exploding and resources need to be carefully allocated. In this context it is important to know the efficacy of drug groups such as the antipsychotics.

Do you intend to publish the review on completion?

Yes

### 36 Keywords

Give words or phrases that best describe the review. (One word per box, create a new box for each term)

[schizophrenia](#)  
[antipsychotics](#)  
[placebo](#)  
[meta-analysis](#)

**37 Details of any existing review of the same topic by the same authors**

Give details of earlier versions of the systematic review if an update of an existing review is being registered, including full bibliographic reference if possible.

**38 Current review status**

Review status should be updated when the review is completed and when it is published.

[Ongoing](#)

**39 Any additional information**

Provide any further information the review team consider relevant to the registration of the review.

**40 Details of final report/publication(s)**

This field should be left empty until details of the completed review are available.  
Give the full citation for the final report or publication of the systematic review.

Give the URL where available.

## I. Differences between protocol and review

The following protocol changes were made post-hoc, but importantly before knowing the results.

1. We extracted, but did not analyze the outcome drop-out due to adverse events, because in recent studies dropouts due to adverse events are often a mix of tolerability and efficacy related events (e.g. exacerbation of psychosis) so that results would not have been meaningful.
2. We added several other outcomes when more resources as planned were available.
3. We decided to use relative risks rather than odds ratios, because the latter can be interpreted more intuitively by clinicians, but we present odds ratios in sensitivity analyses.
4. As the vast majority of the studies was short-term, we did not classify the studies by their duration, but rather examined study duration as a moderator in a meta-regression
5. We added a few potential moderators which had been addressed by research that was published after our protocol<sup>1,2</sup>: degree of response in the placebo and in the drug arms, country (USA versus other countries) and the number of academic sites. As it turned out that many different antipsychotics had been used for which usually only a few trials were available, we restricted our analysis of the moderator ‘drug’ to second-generation versus first-generation antipsychotic, and only explored for haloperidol separately whether its effect size had decreased over time.
6. Following reviewer requests we a) added an analysis of the frequency of which moderators have changed over the years, b) added “differential dropout reasons between drug and placebo group” to the assessment of the risk of bias item “incomplete outcome data”. We had initially not done this, because there is no scientific evidence from which difference in dropout between drug and placebo groups bias may occur. We decided to choose a cutoff of 15% absolute difference in dropouts either due to any reason, or due to inefficacy or due to adverse events between drug and placebo to indicate potential bias. 15% was chosen because it lies between the average difference between drug and placebo based on our two a priori chosen criteria “good response” (approximately 10% difference) and any response (approximately 20%). c) We compared results based on the PANSS rather than the BPRS. d) Instead of comparing first-generation antipsychotics versus second-generation antipsychotic as an effect moderator, we classified antipsychotics by mechanism of action according to the “Neuroscience-based Nomenclature (NbN)” (84): M1 = receptor antagonists (D2) clopenthixol, fluphenazine, haloperidol, perphenazine, pimozide, pipotiazine, sulpiride, trifluoperazine. M2 = receptor antagonists (D2, 5-HT2) chlorpromazine, iloperidone, loxapine, lurasidone, olanzapine, sertindole, thioridazine, ziprasidone, zotepine. M3 = receptor partial agonists (D2, 5-HT1A) aripiprazole, brexpiprazole, cariprazine. M4 = receptor antagonists (D2, 5-HT2, NE alpha2) asenapine, paliperidone, risperidone. M5 = receptor antagonist (D2, 5-HT2) and reuptake inhibitor (NET) quetiapine. A few old drugs had not been classified by NbN yet.

## II. Details on statistical model

### 1. Model implementation

We fitted all models using Markov Chain Monte Carlo (MCMC) simulations in WinBUGS 1.4.3<sup>1</sup>. We employed normal or binomial likelihood for the mean scores (i.e. continuous outcomes) or the number of events (i.e. dichotomous outcomes) respectively in each study arm. We assumed a half-normal prior distribution for the heterogeneity standard deviation  $\tau \sim N(0,1)$  with  $\tau \geq 0$ . Normal vague priors  $N(0,10^4)$  were given to location parameters as well as to the regression coefficients. We evaluated convergence by visual inspection of the mixing of two chains with different initial values. For all models we run 150000 MCMC cycles after discarding the first 30000.

### 2. Code for standard meta-analysis model



```

model{
  for (i in 1:N){
    prec.c[i]<-1/(se.c[i]*se.c[i])
    prec.t[i]<-1/(se.t[i]*se.t[i])
    se.c[i]<-sdc[i]/sqrt(nc[i])
    se.t[i]<-sdt[i]/sqrt(nt[i])
    pooled.sd[i]<-sqrt(((nc[i]-1)*sdc[i]*sdc[i]+(nt[i]-1)*sdt[i]*sdt[i])/(nc[i]+nt[i]-2))
    smd[i]<- (yt[i]-yc[i])/pooled.sd[i]
    var[i]<- ((nt[i]+nc[i])/(nt[i]*nc[i]))+(smd[i]*smd[i])/(2*(nt[i]+nc[i])))
    w[i]<-1/var[i]
    w.sq[i]<-pow(w[i],2)
    yc[i]~dnorm(phi.c[i],prec.c[i]) # normal likelihood
    yt[i]~dnorm(phi.t[i],prec.t[i])
    phi.c[i]<-u[i]*pooled.sd[i]
    phi.t[i]<-(u[i]+theta1[i])*pooled.sd[i]
    theta1[i]<-theta[i]
    theta[i]~dnorm(SMD,SD)
    u[i]~dnorm(0,.0001) # priors
  }
  SMD~dnorm(0,.0001)
  SD<-1/pow(tau,2)
  tau~ dnorm(0,1)I(0,)
  SMDtrans<--SMD # transformed SMD - the larger the better
  I.sq<-pow(tau,2)/(pow(tau,2)+sigma.sq)
  sigma.sq<-sw*(N-1)/(pow(sw,2)-sw.sq)
  sw<-sum(w[])
  sw.sq<-sum(w.sq[])

```

### 3. Code for univariable meta-regression model

```

model{
  for (i in 1:N){
    prec.c[i]<-1/(se.c[i]*se.c[i])
    prec.t[i]<-1/(se.t[i]*se.t[i])
    se.c[i]<-sdc[i]/sqrt(nc[i])
    se.t[i]<-sdt[i]/sqrt(nt[i])
    pooled.sd[i]<-sqrt(((nc[i]-1)*sdc[i]*sdc[i]+(nt[i]-1)*sdt[i]*sdt[i])/(nc[i]+nt[i]-2))
# x1[i]<-x[i]-2 ##### for Narms, Nmed
# x1[i]<-(x[i]-mean(x[])) ##### for continous moderatos
x1[i]<-x[i] ##### for dichotomous moderators
    yc[i]~dnorm(phi.c[i],prec.c[i]) # normal likelihood
    yt[i]~dnorm(phi.t[i],prec.t[i])
    phi.c[i]<-u[i]*pooled.sd[i]
    phi.t[i]<-(u[i]+theta1[i])*pooled.sd[i]
    theta1[i]<-theta[i]+B*x1[i]
    theta[i]~dnorm(SMD,SD)
    u[i]~dnorm(0,.0001) # priors
  }
  SMD~dnorm(0,.0001)
  SD<-1/pow(tau,2)
  tau~ dnorm(0,1)I(0,)
  B~dnorm(0,.0001)
  SMDtrans<--SMD
  Btrans<--B

```

### 4. Code for multivariable meta-regression model

```

model{

```

```

for (i in 1:N){
  prec.c[i]<-1/(se.c[i]*se.c[i])
  prec.t[i]<-1/(se.t[i]*se.t[i])
  se.c[i]<-sdc[i]/sqrt(nc[i])
  se.t[i]<-sdt[i]/sqrt(nt[i])
  pooled.sd[i]<-sqrt(((nc[i]-1)*sdc[i]*sdc[i]+(nt[i]-1)*sdt[i]*sdt[i])/(nc[i]+nt[i]-2))
  var[i]<- (((nt[i]+nc[i])/(nt[i]*nc[i]))+(smd[i]*smd[i])/(2*(nt[i]+nc[i])))
    smd[i]<- ((yt[i]-yc[i])/pooled.sd[i])
    yc[i]~dnorm(phi.c[i],prec.c[i]) # normal likelihood
    yt[i]~dnorm(phi.t[i],prec.t[i])
    phi.c[i]<-u[i]*pooled.sd[i]
    phi.t[i]<-(u[i]+theta1[i])*pooled.sd[i]
    theta1[i]<-theta[i]+b[1]*(x1[i]-mean(x1[[]]))+b[2]*(x2[i]-mean(x2[[]]))+b[3]*(x3[i]-
mean(x3[[]]))+b[4]*(x4[i]-mean(x4[[]]))+b[5]*x5[i]+b[6]*x6[i]+b[7]*(x7[i]-
2)+b[8]*x8[i]+b[9]*x9[i]+b[10]*x10[i]+b[11]*x11[i]+b[12]*x12[i]+b[13]*x13[i]+b[14]*(x14[i]-
mean(x14[[]])) # meta-regression model
    theta[i]~dnorm(SMD,prec)
    u[i]~dnorm(0,.0001) # priors
  }
  SMD~dnorm(0,.0001)
  prec<-1/pow(tau,2)
  tau~ dnorm(0,1)I(0,)
  SMDtrans<--SMD
  for(i in 1:14){
    b[i]~dnorm(0,0.0001)
    btrans[i]<--b[i]
  }
}

```

## 5. Description of the selection model

### 5.1 Selection models

A variety of visual-based and regression-based methods that explore for small-study effects exist; an association between observed effect sizes and some measure of its precision (usually the standard error). One of the possible causes for small-study effects could be publication bias, but it can also be caused due to true heterogeneity. For example, small trials may include severely ill patients that are harder to recruit and for whom the intervention is more effective.<sup>4</sup>

Publication bias occurs when the probability of a study being missing depends on the magnitude and direction of results. Publication bias is a missing data problem. When studies are missing for reasons that relate to the outcome of the study, just like in publication bias where probability of publication relates to the magnitude of the effect, we say that studies are missing not at random. In such a scenario, the observed studies are not a representative sample of all studies conducted and their analysis will give biased results (usually by exaggerating efficacy).

Selection models have been suggested to explain the selection mechanism; the mechanism by which studies are selected for publication. If the probability of publication is associated with the magnitude of effect, then we have publication bias. We cannot test the selection mechanism because the actual data needed to check it are missing (unpublished studies). For this reason, we have to resort to assumptions about what may cause the studies to be missing and conduct a sensitivity analysis with an aim to explore robustness of results. Copas (1999)<sup>3</sup> developed a selection model in which the probability of publication for a study depends both on its effect size and standard error. The model needs to determine a-priori the probabilities of publication for the largest and smallest studies included in the meta-analysis. One way to achieve this is by using expert opinion (Mavridis et al. 2013<sup>4</sup>). Alternatively one could conduct a sensitivity analysis assuming various probabilities of publication for the largest and smallest observed study and explore how robust is the summary intervention effect as these probabilities become smaller (as selection bias becomes more severe).

The model can also be fit in a Bayesian setting.<sup>4</sup> A major advantage of this model when applied in a Bayesian framework is that it allows us to estimate the actual correlation between probability of publication and effect size along with its 95% credible interval. If zero is included in this interval then we cannot claim that there is publication bias. With few studies, uncertainty about the correlation would be large and it could be the case that we lack power to detect publication bias. If zero is not included in the 95% credible interval then there is an association between probability of publication and magnitude of effect which is the actual definition of publication bias. We can monitor this correlation coefficient across the sensitivity analyses. A selection model will also give an adjusted, corrected for publication bias, summary estimate and we will be able to see how much the observed data exaggerate the intervention effect or if assuming different degrees of selection may change direction of results.

We employed this model in OpenBUGS.<sup>5</sup> In this network of 93 antipsychotic placebo control trials reporting the primary outcome (overall efficacy), the largest study had 671 participants and the smallest study had 12 participants. We assumed four scenarios that are described below

- Scenario 1: A large study of about 700 participants has an 90% chance of being published and a small study of about 10 participants has a 50% chance of being published.
- Scenario 2: A large study of about 700 participants has an 90% chance of being published and a small study of about 10 participants has a 30% chance of being published.
- Scenario 3: A large study of about 700 participants has an 80% chance of being published and a small study of about 10 participants has a 40% chance of being published.
- Scenario 4: A large study of about 700 participants has an 70% chance of being published and a small study of about 10 participants has a 10% chance of being published.

These probabilities of publication are expressed via uniform distributions on intervals of 0.10 units length. For example, the probabilities for the first scenario (0.9 and 0.5 respectively) are expressed by uniform distributions on [0.85,0.95] and [0.45,0.55] respectively. We assumed these scenarios to explore how robust results are to the extent of the selection bias. We also assigned a standard normal distribution truncated at zero prior distribution for the heterogeneity standard deviation and a vague normal distribution centered at zero for the summary estimate. At the end of this text we present the Open BUGS code used in this analysis. Appendix Table 1 shows the four scenarios, the correlation between probability of publication and magnitude of effect with its 95% credible interval is given in the fourth column. Based on our a priori judgement we considered scenario 2 (that a study with 10 patients has a probability of being published of 30% and a study with 700 participants of 90%) as the primary one. We should note that a non-zero correlation is the actual definition of publication bias as it suggests that the probability of publication depends on the magnitude of results and therefore the published studies is not a representative sample of the studies conducted on the topic. We see in Appendix Table 1 that in all scenarios we have a non-zero correlation. The adjusted for publication bias summary estimate with its 95% credible interval are given in the fifth column. We see that the adjusted summary estimate decreases as we increase the amount of selection bias. These adjusted results are compared to the unadjusted summary estimate of 0.49. We see that all adjusted estimates do not include the unadjusted summary estimate (0.49) in their 95% credible intervals. Hence, if any of these scenarios is true, the analysis of the published studies exaggerates effectiveness. We should note that under all scenarios there is a significant effect. We also note that the trim-and-fill method led to a similar adjusted effect size (0.38, 95% Cri 0.33,0.43; 31 missing studies imputed).<sup>6</sup> However, the trim-and-fill method is based on an even stronger assumption than the selection model, namely that all funnel-plot asymmetry is due to publication bias. {Mavridis, 2014 #1436} There is empirical evidence that selection models are preferable to the trim and fill method.<sup>7</sup> Therefore, we only used the trim-and-fill method to corroborate our results.

## Appendix Table 1: Four scenarios of selection bias

The correlation between probability of publication and magnitude of effect (a zero correlation suggests evidence against publication bias) with its 95% credible interval is given in the fourth column. The adjusted for publication bias summary estimate with its 95% credible interval are given in the fifth column. We note the unadjusted estimate is 0.49 (95% CrI 0.44-0.54). In all sensitivity analyses, the adjusted estimate is reduced around 20% in comparisons with the unadjusted estimate.

| Scenario | Probability of publication for the smallest trial (10 patients) | Probability of publication for the largest trial (700 patients) | Correlation between probability of publication and magnitude of effect | Adjusted summary estimate | Heterogeneity standard deviation |
|----------|-----------------------------------------------------------------|-----------------------------------------------------------------|------------------------------------------------------------------------|---------------------------|----------------------------------|
| 1        | 0.5                                                             | 0.9                                                             | 0.85(0.53,1.00)                                                        | 0.41 (0.36,0.46)          | 0.17 (0.13,0.22)                 |
| <b>2</b> | <b>0.3</b>                                                      | <b>0.9</b>                                                      | <b>0.82 (0.52,0.99)</b>                                                | <b>0.39 (0.34,0.44)</b>   | <b>0.17 (0.13,0.22)</b>          |
| 3        | 0.4                                                             | 0.8                                                             | 0.84 (0.54,0.99)                                                       | 0.39 (0.34,0.44)          | 0.18 (0.13,0.22)                 |
| 4        | 0.1                                                             | 0.7                                                             | 0.66 (0.38,0.90)                                                       | 0.36 (0.29,0.42)          | 0.17 (0.12,0.22)                 |

The bolded model is the primary one

## 5.2 Stochastic Search Variable Selection

Consider that we have a response variable whose variation we would like to account for by including a set of predictors. The major question is which predictors explain some of the response variable's variation. Methods used to answer this problem are called variable selection methods. A method called Stochastic Search Variable Selection (SSVS) was introduced by George and McCulloch<sup>8</sup> with an aim to identify promising subsets of predictors for a response variable in a Bayesian setting. The method considers the regression equation to be the core of a larger hierarchical model with key feature that its regression coefficient is modeled a-priori as a mixture of two normal distributions with mean zero but with different variances. The method associates a latent indicator variable to each regression coefficient. The latent variable assumes value one if the corresponding predictor is to be included in the model and value zero otherwise. If a variable is not to be included in the regression equation (latent variable assumes value zero), then the variance of the regression coefficient is small enough to constraint the regression coefficient to take a-posteriori a value close to zero. The indicator variable can be estimated in each MCMC draw and after running thousands of MCMC draws we can estimate its distribution and see each value is more probable (zero or one) to decide whether the specific variable should be kept in the analysis or not. More specifically, with  $p$  predictors there are  $p$  latent indicator variables that are estimated by running a long MCMC chain. In the end we will count the proportion of times each predictor was selected for inclusion in the model during the MCMC draws. We may choose to include those with probabilities of inclusion larger than 0.5 (median selection criterion). Alternative, we may choose this pattern of predictors that had the higher frequency of selection during the MCMC draws. We employed the analysis in OpenBUGS.<sup>5</sup> We standardized all predictors and assumed that the probability of inclusion in the model for each predictor follows a Bernoulli distribution with a 0.5 probability. The prior distribution for a regression coefficient was assigned to be a normal distribution with zero mean and standard deviation similar to that estimated from a pilot regression model if the corresponding predictor is to be included in the model and the standard deviation was multiplied by 10 if the corresponding predictor is not to be included in the model. For each of the MCMC draws, we check how likely are the simulated values for each

regression coefficient to be derived from these distributions with an aim to decide, in a stochastic way, if the corresponding predictor should be included in the model. More information can be found in George and McCulloch (1993).<sup>8</sup> We also assigned a standard normal distribution truncated at zero prior for the heterogeneity standard deviation and a vague normal distribution centered at zero for the summary estimate. The code used in the paper is presented at the end of this text.

### 5.3 OpenBUGS Codes for selection model and the stochastic search variable selection algorithm

#### Code for the selection model in winbugs

OpenBUGS code used in the paper by Mavridis et al. 2013<sup>4</sup>

The code requires study-level data. More specifically, it requires the observed effect sizes, the corresponding standard errors and the number of studies.

We also need to assign two probability distributions, one for observing the largest study in the sample and one for the smallest study in the sample. The smallest study has a Uniform distribution on [L1,L2] and the largest study has a Uniform distribution on [U1,U2]

```

model{
lower~dunif(l1,l2)
upper~dunif(u1,u2)
smin<-ranked(s[],1)
smax<-ranked(s[],N)
invNCDFU<-5.531*(pow((1-upper)/upper,0.1193)-1)*step(0.5-upper)-5.531*(pow((1-
upper)/upper,0.1193)-1)*step(upper-0.5)
invNCDFL<-5.531*(pow(lower/(1-lower),0.1193)-1)*step(0.5-lower)-5.531*(pow((lower)/(1-
lower),0.1193)-1)*step(lower-0.5)
beta<-(invNCDFL-invNCDFU)/(1/smax-1/smin)
alpha<-invNCDFU-beta/smin
for(i in 1:N){u[i]<-alpha+beta/s[i]
prob.pub[i]<-phi(u[i])
pub.stud[i]<-1/prob.pub[i]}
for(i in 1:N){z[i]~dnorm(u[i],1)T(0,)
y[i]~dnorm(my[i],w[i])
my[i]<-mu[i]+rho*s[i]*(z[i]-u[i])
vy[i]<-pow(s[i],2)*(1-pow(rho,2))
w[i]<-1/vy[i]
mu[i]~dnorm(mean,prec)}
rho1~dunif(0,2)
rho<-rho1-1
mean~dnorm(0,0.0001)
prec<-1/pow(tau,2)
tau~dnorm(0,1)T(0,)
tot.pub<-sum(pub.stud[1:N])}
list(N=105,l1=0.25,l2=0.35,u1=0.85,u2=0.95,y=c(-0.60259992178083, -0.600955510890836, -
0.220175897552412,
-0.711979061547328, -0.663860277711781, -1.47555157660876, -0.327764758659764,
-0.733851734863555, -0.587049244241413, -0.364605244307876, -0.666258291039483,
-0.313815007782107, -1.03475620370191, -0.79960552793955, -0.851103345905764,
-0.812133000199301, -0.578616352201258, -0.385818372743474, -0.32687256135012,
-0.548110251889547, -0.752374136897279, -1.02738580935594, -0.43192705046391,
-0.464318407242905, -0.967741935483871, -0.327510917030568, -0.254250176104386,
-0.128620360230212, -0.492710016821291, -0.687129972547463, -1.59742030507428,
-0.594620175648966, -0.507657437831229, -0.602769215888656, -0.23470564822711,
0.0952548714382716, -1.2423195988393, -0.694175265562771, -0.921810174768514,
-0.713541431985938, -0.342719606234092, -0.488340920685264, -0.134330236330879,

```

-0.775193798449612, -0.393283088029764, -0.439475010856266, -0.735370308560916,  
-0.320130314589803, -0.473308339405223, -0.250378313925739, -0.255102022322193,  
-0.640327045674849, -0.458242910523129, -0.430257055115497, -0.521855096079678,  
-0.623335841568804, -0.764285714285714, -0.580237123571166, -0.459191314937191,  
-0.377660919739033, -0.59854665855608, -0.695626108983674, -0.688158456368155,  
-0.494043423913189, -0.585144358196043, -0.00638941348299581,  
-0.483632143188439, -0.410395493058603, -0.203787666135144, -0.294971601120217,  
-0.761929368684899, -0.295641362498887, -0.385013481002378, -0.27955205692842,  
-0.783424086448706, -0.453502930297463, -0.370057772741133, -0.747431923558448,  
-0.318430345434855, -0.266023029564635, -0.409013408218831, -0.557130205652991,  
-1.03748817972675, -0.178169156869949, -0.212440667004588, -0.874249301680174,  
-0.588503332333437, -1.01711004259853, -0.653619508574476, -0.468707515962158,  
-0.593080854719082, -0.509336734650731, -0.396076376334595, -0.264791773597281,  
-0.35186565619566, -0.238296237035525, -0.392127320070985, -0.40087483786338,  
0.167737242111564, -0.405433744203929, -0.607614686911184, -0.328273110886443,  
-0.800883496590289, -0.122882446404732, -0.525023409664375)  
, s=c(0.164303835272551, 0.119473163832737, 0.199631356809023, 0.208462237761915,  
0.148732563883815, 0.275652151020311, 0.410435332645296, 0.476393193589325,  
0.170420280394965, 0.195895301558864, 0.135521528304817, 0.279053376887781,  
0.308174623489146, 0.329260914783547, 0.272872465571115, 0.335579811137393,  
0.350539955099196, 0.272248003837223, 0.289120322036197, 0.35724657714165,  
0.415406079838355, 0.433332549772096, 0.170828510061758, 0.194567879550458,  
0.158675690919416, 0.150685127705698, 0.0976830786104298, 0.106460035145051,  
0.177380566619894, 0.113985308045687, 0.708934116510964, 0.145636890428814,  
0.149832274072948, 0.553900213923314, 0.112764204939312, 0.130904395276373,  
0.612713386378129, 0.47087033185956, 0.481598438025417, 0.116651342936374,  
0.120260464302315, 0.126043063651918, 0.173860871748403, 0.379557827605769,  
0.104949976206657, 0.115768140277263, 0.101786366092748, 0.10667285361621,  
0.205063926128869, 0.1565182958041, 0.129953720979347, 0.15679196845133,  
0.113252302068502, 0.121034175589037, 0.147185051699274, 0.119289611718074,  
0.220562656730598, 0.599742360381231, 0.115927885051776, 0.160789340761631,  
0.278422095963823, 0.248315722984881, 0.326444240610391, 0.149698620154959,  
0.178946951553204, 0.137533628157868, 0.139013182386713, 0.150649675207028,  
0.104258569692281, 0.10800837743558, 0.108168801650678, 0.114196590155669,  
0.100674398355586, 0.0925426238544508, 0.216385553724039, 0.165632100930506,  
0.1389973644513, 0.378562156318883, 0.199815798523331, 0.177256714603352,  
0.118967500698703, 0.135190146262167, 0.35057708368964, 0.170782568970086,  
0.187694504264653, 0.275879757352228, 0.171481570394913, 0.185438991926809,  
0.29148840494776, 0.247168389912314, 0.278309605612755, 0.0933590181061578,  
0.0950763255848033, 0.1275764036451, 0.117952267313158, 0.0915756932087625,  
0.0924945795486918, 0.162353006776145, 0.282699703710523, 0.110617602548502,  
0.0945996234549639, 0.12932222885624, 0.236982290174067, 0.13389633865265,  
0.120110613871636))

**Code for the stochastic search variable selection algorithm**

```

model{
for (i in 1:N){
  prec.c[i]<-1/(se.c[i]*se.c[i])
  prec.t[i]<-1/(se.t[i]*se.t[i])
  se.c[i]<-sdc[i]/sqrt(nc[i])
  se.t[i]<-sdt[i]/sqrt(nt[i])
  pooled.sd[i]<-sqrt(((nc[i]-1)*sdc[i]*sdc[i]+(nt[i]-1)*sdt[i]*sdt[i])/(nc[i]+nt[i]-2))
  var[i]<- (((nt[i]+nc[i])/(nt[i]*nc[i]))+(smd[i]*smd[i])/
(2*(nt[i]+nc[i])))

```

```

smd[i]<- ((yt[i]-yc[i])/pooled.sd[i])

yc[i]~dnorm(phi.c[i],prec.c[i]) # normal likelihood
yt[i]~dnorm(phi.t[i],prec.t[i])

phi.c[i]<-u[i]*pooled.sd[i]
phi.t[i]<-(u[i]+theta1[i])*pooled.sd[i]

theta1[i]<-theta[i]+b[1]*(x1[i]-mean(x1[]))+b[2]*(x2[i]-mean(x2[]))+b[3]*(x3[i]-
mean(x3[]))+b[4]*(x4[i]-mean(x4[]))+b[5]*x5[i]+b[6]*x6[i] # meta-regression model

theta[i]~dnorm(SMD,prec)
u[i]~dnorm(0,.0001) # priors
}
SMD~dnorm(0,.0001)
prec<-1/pow(tau,2)
tau~ dnorm(0,1)I(0,)
for(i in 1:6){
b[i]~dnorm(0,prior.precision[i])
gamma[i]~dbern(0.5)
}
prior.precision[1] <- gamma[1]*10000 + (1-gamma[1])*1000000
prior.precision[2] <- gamma[2]*1000 + (1-gamma[2])*100000
prior.precision[3] <- gamma[3]*10000 + (1-gamma[3])*10000000
prior.precision[4] <- gamma[4]*10000 + (1-gamma[4])*10000000
prior.precision[5] <- gamma[5]*20 + (1-gamma[5])*2000
prior.precision[6] <- gamma[6]*1000 + (1-gamma[6])*100000
}

```

### data for the stochastic search variable selection algorithm

```

list(N=78,
yt=c(-7.1816,-12.3000,-13.5708,46.4000,-10.3000,-8.1000,-15.7000,-17.6907,34.7750,38.0000,
32.0644,37.8062,27.2392,-10.4893,-5.7000,-31.5000,-11.3000,-12.1078,-15.1600,-17.0000,
-17.2108,-26.5437,-26.2000,-17.7598,-8.7500,-9.3044,-15.0000,-28.4000,-13.5596,-19.6020,
-20.2626,-10.1000,-20.6800,-10.7000,-10.0528,-17.1780,-13.0400,-14.0000,-19.7000,-19.1200,
-14.6931,-18.0316,37.7481,41.6480,-19.7000,-12.4261,-12.0253,-18.0000,-21.0000,-20.5235,
-25.4351,-10.5415,-13.8220,-14.0106,-13.4500,-13.1000,-20.3300,41.2000,-14.6000,-10.6200,
-10.4259,-8.9719,-14.9000,-17.0000,-8.2400,-14.7000,-22.9000,16.7700,37.9706,-23.9545,
-21.4774,-13.4000,-16.6000,-13.2187,-21.6712,-8.7800,-16.8293,-24.9000)
,
sdt=c(14.7702,21.8000,15.1889,4.5000,16.4590,16.0000,14.9000,29.5340,8.5923,15.9000,
14.9793,10.3124,10.3752,18.1845,15.0000,19.5300,18.3200,19.1694,21.4585,19.2800,
21.0119,23.5549,23.3600,19.1947,17.4500,17.9614,26.0200,23.8600,24.2469,20.5289,
17.6467,13.1000,24.2500,20.4000,20.1459,19.5360,24.5400,19.9000,19.3000,35.0000,
21.0981,24.6103,15.5881,16.3489,25.5000,19.7985,24.4909,25.3000,19.5000,25.9221,
19.9180,20.5123,28.3168,23.3325,15.7243,25.8353,19.1000,10.1000,14.6400,21.1700,
21.5487,14.4853,16.7700,20.1900,14.8400,20.2200,16.9200,11.2300,10.9125,20.6567,
18.0626,14.9000,21.4585,20.1973,16.4458,6.4600,19.5269,19.7000)
,
nt=c( 154, 49, 195, 9, 106, 53, 116, 43, 30, 17,
57, 37, 25, 103, 51, 93, 94, 427, 433, 51,

```

249, 237, 91, 311, 12, 180, 70, 458, 298, 502,  
326, 51, 62, 252, 127, 327, 200, 95, 151, 34,  
289, 114, 54, 40, 96, 207, 158, 90, 362, 357,  
362, 229, 295, 519, 66, 108, 157, 15, 76, 101,  
224, 268, 61, 45, 22, 71, 81, 27, 51, 563,  
455, 75, 124, 351, 156, 30, 140, 198)

,  
yc=c(1.7100,2.8000,-3.1000,50.5000,-0.6000,-2.1000,-5.3000,4.6000,41.7500,47.2000,  
37.4800,41.1800,32.9200,-2.9000,1.8000,-12.6000,-5.3000,-7.1000,-12.4000,-6.0000,  
-2.8000,-12.5800,-14.4000,-13.2000,5.0000,3.8000,-11.7000,-18.8000,-2.9000,-4.1000,  
-14.6000,-4.1000,-14.6000,-5.6000,3.3000,-8.0000,-2.3300,-4.2000,-7.7000,7.6300,  
-5.0000,-8.5000,47.6000,51.9300,-4.6000,-12.3000,-0.4000,-7.8000,-17.0000,-12.9000,  
-10.3000,-4.1000,-3.5000,-7.6000,-1.1000,-1.4000,-12.6100,48.9000,-9.9000,-5.0000,  
-1.2000,-0.9000,-11.9000,-12.7000,4.8200,-2.7000,-6.4000,25.3900,43.0000,-13.3000,  
-14.3000,-7.4000,-7.9000,-0.9500,-16.2000,-0.9900,-14.4000,-14.5000)

,  
sdc=c(14.7100,20.6000,17.5000,6.4000,16.6500,16.9000,16.3000,17.7000,8.5800,15.9000,  
10.3406,10.3406,10.3406,16.3000,17.1000,19.5300,18.3200,21.2300,21.4585,23.8500,  
20.8900,23.2000,23.1300,20.1000,23.0300,18.8800,22.8400,26.5000,24.2800,23.1600,  
17.8000,12.2000,24.3000,18.6000,22.2000,21.5000,25.5400,17.6000,19.2000,35.0000,  
21.1400,26.4000,10.3406,8.9500,26.4000,19.5500,23.1100,24.4000,20.0000,25.6000,  
19.7000,24.1000,23.6000,21.5000,15.8400,25.7300,24.0000,10.5000,15.0000,21.0300,  
24.5600,14.5000,16.8900,20.2700,14.9900,20.5600,15.1300,15.1800,10.3406,21.8900,  
18.3000,15.0300,21.4585,20.1800,17.0100,11.1400,20.1300,20.0000)

,  
nc=c( 51, 49, 62, 10, 54, 53, 114, 22, 14, 17,  
18, 18, 12, 53, 58, 85, 85, 140, 111, 91,  
120, 61, 93, 106, 8, 138, 63, 115, 102, 126,  
122, 47, 122, 78, 64, 105, 107, 96, 144, 62,  
103, 60, 25, 13, 49, 71, 80, 90, 124, 114,  
120, 117, 152, 152, 35, 57, 79, 15, 38, 47,  
106, 71, 79, 78, 41, 71, 55, 23, 25, 148,  
149, 80, 253, 174, 99, 53, 93, 112)

,  
x1=c(1997,1996,1996,1991,1992,1996,2008,1993,1970,1970,  
1971,1972,1975,2000,2000,2004,2006,2008,2010,1999,  
2005,2009,2012,2009,1984,2007,2008,2007,2002,2007,  
2010,1998,2011,2008,1994,2004,2007,2004,2007,2007,  
2003,2007,1976,1972,2010,2010,1998,2010,2010,2010,  
2010,2008,2008,2008,2002,2002,1996,1969,2008,1996,  
1995,1997,2014,2013,2014,2014,2012,1992,1975,2014,  
2015,2015,2014,2015,2015,2016,2016,2016) #year

,  
x2=c(2.0000,2.8000,-5.0000,-5.0000,-1.0000,-3.0000,-5.3000,4.6000,5.0000,-2.1000,  
-8.0000,-2.0000,-9.0000,-4.0000,2.0000,-12.6000,-5.3000,-7.1000,-12.4000,-6.0000,  
-2.8000,-12.5800,-14.4000,-13.2000,7.0000,3.8000,-11.7000,-18.8000,-2.9000,-4.1000,  
-14.6000,-5.0000,-14.6000,-5.6000,3.3000,-8.0000,-2.3300,-4.2000,-7.7000,7.6300,  
-5.0000,-8.5000,-7.0000,17.0000,-4.6000,-12.3000,-0.4000,-7.8000,-17.0000,-12.9000,  
-10.3000,-4.1000,-3.5000,-7.6000,-1.1000,-1.4000,-12.6100,5.0000,-9.9000,-5.0000,  
-1.2000,0.7000,-11.9000,-12.7000,4.8200,-2.7000,-18.4000,-5.0000,-25.0000,-13.3000,  
-14.3000,-7.4000,-7.9000,-0.9500,-16.2000,0.9900,-14.4000,-14.5000) #changePLA

,  
x3=c(630.8, 300, 712.5, 800, 840, 245.6, 600, 900, 559.5, 600, 664.6667,  
811.455, 895, 507, 482, 450, 200, 675, 520, 600, 450.15, 600,  
680, 411.25, 1200, 350.1, 400.2, 440.8, 525, 453.485, 426.25,  
450, 450, 533.6, 900, 450.15, 348.4, 600, 600, 450, 550, 425,



814, 1200, 497.5, 488.4375, 675, 500, 499.375, 474.375, 612.9688,  
 637.5, 578.8125, 626.375, 900, 600, 591, 539, 560.28, 483.3,  
 780, 599.4, 450, 450, 450, 450, 450, 480, 1000, 400, 200, 400,  
 400, 377.095, 350, 600, 300, 608.75) #meanDOSE

,  
 x4=c( 208, 100, 270, 19, 160, 109, 239, 65, 44, 34,  
 86, 55, 43, 159, 121, 180, 182, 606, 565, 196,  
 376, 307, 184, 417, 23, 321, 135, 588, 414, 630,  
 458, 95, 184, 351, 196, 444, 314, 196, 303, 97,  
 404, 182, 87, 57, 149, 285, 246, 180, 500, 478,  
 488, 375, 463, 706, 103, 188, 246, 30, 114, 153,  
 348, 354, 142, 130, 63, 155, 194, 65, 82, 729,  
 617, 167, 438, 532, 262, 86, 235, 311) #Ntotal

,  
 x5=c( 1, 1, 1, 0, 1, 1, 0, 1, 1, 0,  
 0, 1, 1, 1, 1, 0, 1, 1, 1, 1,  
 1, 0, 0, 1, 0, 1, 1, 1, 1, 1,  
 1, 1, 0, 1, 1, 1, 1, 0, 0, 0,  
 1, 1, 0, 0, 1, 1, 1, 1, 1, 1,  
 1, 1, 1, 1, 1, 1, 1, 0, 1, 1,  
 1, 1, 0, 0, 0, 0, 0, 0, 1, 1,  
 1, 0, 0, 1, 1, 0, 1, 1) #sponsor

,  
 x6=c( 1, 1, 1, 1, 1, 1, 1, 1, 1, 0, 0,  
 0, 0, 0, 0, 0, 1, 1, 1, 1, 1,  
 1, 1, 1, 1, 0, 0, 1, 1, 1, 1,  
 1, 1, 1, 1, 1, 1, 1, 1, 1, 1,  
 1, 1, 0, 0, 1, 1, 1, 1, 1, 1,  
 1, 1, 1, 1, 1, 1, 1, 0, 1, 1,  
 1, 1, 1, 1, 1, 1, 1, 0, 0, 1,  
 1, 1, 0, 1, 1, 1, 1, 1, 1) #MinSevCrityesno)

## References

1. Agid O, Siu CO, Potkin SG, et al. Meta-regression analysis of placebo response in antipsychotic trials, 1970-2010. *Am J Psychiatry* 2013; **170**(11): 1335-44.
2. Rutherford BR, Pott E, Tandler JM, Wall MM, Roose SP, Lieberman JA. Placebo response in antipsychotic clinical trials: a meta-analysis. *JAMA psychiatry* 2014; **71**(12): 1409-21.
3. Copas JB. What works? Selectivity models and meta-analysis. *Journal of the Royal Statistical Society* 1999; **162**: 95-109.
4. Mavridis D, Sutton A, Cipriani A, Salanti G. A fully Bayesian application of the Copas selection model for publication bias extended to network meta-analysis. *Stat Med* 2013; **32**(1): 51-66.
5. Lunn D, Spiegelhalter D, Thomas A, Best N. The BUGS project: Evolution, critique and future directions. *Statistics in Medicine* 2009; **28**(25): 3049-67.
6. Duval S, Tweedie R. Trim and fill: A simple funnel-plot-based method of testing and adjusting for publication bias in meta-analysis. *Biometrics* 2000; **56**(2): 455-63.
7. Schwarzer G, Carpenter J, Rücker G. Empirical evidence suggests Copas selection model preferable to trim-and-fill method for selection bias in meta-analysis. *Journal of Clinical Epidemiology* 2010; **63**: 282-8.
8. George EI, McCulloch RE. Variable selection via Gibbs sampling. *Journal of the American Statistical Association* 1993; **88**(423): 881-9.

## **Supplementary Table S3**

### **Description of the search strategy**

**ALL ELECTRONIC SEARCHES HAVE BEEN UPDATED IN OCTOBER 2016. THE SEARCH TERMS WERE THE SAME AS THOSE IN AN INITIAL SEARCH IN JUNE 2014**

**1. Search in June 2014**

**Database: Ovid MEDLINE(R) <1946 to May Week 4 2014>**

**Search Strategy:**

-----

1 (Acepromazine or Acetophenazine or Amisulpride or Aripiprazole or Asenapine or Benperidol or Blonanserin or Bromperidol or Butaperazine or Carpipramine or Chlorproethazine or Chlorpromazine or Chlorprothixene or Clozapine or Clozapine or Cyamemazine or Cyamemazine or Dixyrazine or Droperidol or Fluanisone or Flupehenazine or Flupenthixol or Flupentixol or Fluphenazine or Fluspirilen or Fluspirilene or Haloperidol or Iloperidone or Levomepromazine or Levosulpiride or Lithium or Loxapine or Loxapinsuccinate or Lurasidone or Melperone or Mepazine or Mesoridazine or Methotrimeprazine or Molindone or Moperone or Mosapramine or Olanzapine or Oxypertine or Paliperidone or Penfluridol or Perazine or Periciazine or Pericyazine or Perospirone or Perphenazine or Pimozide or Pipamperone or Pipothiazine or Pipotiazine or Prochlorperazine or Promazine or Promethazine or Prothipendyl or Quetiapine or Remoxipiride or Reserpine or Risperone or Risperdal or Risperidone or Seroquel or Sertindole or Stelazine or Sulpiride or Sultopride or Thiopropazate or Thioproperazine or Thioridazine or Tiospirone or Thiothixene or Tiapride or Tiotixene or Trifluoperazine or Trifluoperidol or trifluoperidol or Triflupromazine or trifluperazine or Veralipride or Ziprasidone or Zotepine or Zuclopenthixol).mp. (124527)

2 (Antipsychoti\$ or Anti-psychotic\$ or Neurolepic\$ or Neurolept\$).mp. (60102)

3 Antipsychotic Agents/ (41474)

4 or/1-3 (153726)

5 exp Placebos/ (32622)

6 placebo.tw. (150333)

7 or/5-6 (163940)

8 exp schizophrenia/ (85058)

9 exp Paranoid Disorders/ (3708)

10 schizo\$.mp. (125268)

11 hebephreni\$.mp. (263)

12 oligophreni\$.mp. (1009)

13 psychotic\$.mp. (47123)  
14 psychosis.mp. (22339)  
15 psychoses.mp. (18152)  
16 or/8-15 (168577)  
17 exp clinical trial/ (767995)  
18 exp randomized controlled trials/ (94410)  
19 exp double-blind method/ (126086)  
20 exp single-blind method/ (19151)  
21 exp cross-over studies/ (34260)  
22 randomized controlled trial.pt. (374960)  
23 clinical trial.pt. (487713)  
24 controlled clinical trial.pt. (88427)  
25 (clinic\$ adj2 trial).mp. (578941)  
26 (random\$ adj5 control\$ adj5 trial\$).mp. (488092)  
27 (crossover or cross-over).mp. (63590)  
28 ((singl\$ or double\$ or trebl\$ or tripl\$) adj (blind\$ or mask\$)).mp. (173169)  
29 randomi\$.mp. (561477)  
30 (random\$ adj5 (assign\$ or allocat\$ or assort\$ or reciev\$)).mp. (162626)  
31 or/17-30 (1058069)  
32 4 and 7 and 16 and 31 (2206)  
33 limit 32 to ed=20080101-20140606 (664)

**Database: PsycINFO <1806 to June Week 1 2014>**

**Search Strategy:**

-----  
1 (Acepromazine or Acetophenazine or Amisulpride or Aripiprazole or Asenapine or Benperidol or Blonanserin or Bromperidol or Butaperazine or Carpipramine or Chlorproethazine or Chlorpromazine or Chlorprothixene or Clocapramine or Clopenthixol or Clopentixol or Clothiapine or Clotiapine or Clozapine or Cyamemazine or Cyamepromazine or Dixyrazine or Droperidol or Fluanisone or Flupehenazine or Flupenthixol or Flupentixol or Fluphenazine or Fluspirilen or Fluspirilene or Haloperidol or Iloperidone or Levomepromazine or Levosulpiride or Lithium or Loxapine or Loxapinsuccinate or Lurasidone or Melperone or Mepazine or Mesoridazine or Methotrimeprazine or Molindone or Moperone or Mosapramine or Olanzapine or Oxypertine or Paliperidone or Penfluridol or Perazine or Periciazine or Pericyazine or Perospirone or Perphenazine or Pimozide or Pipamperone or Pipothiazine or Pipotiazine or Prochlorperazine or Promazine or Promethazine or Prothipendyl or Quetiapine or Remoxipiride or Reserpine or Riospirone or Risperdal or Risperidone or Seroquel or Sertindole or

Stelazine or Sulpiride or Sultopride or Thiopropazate or Thioproperazine or Thioridazine or Tiospirone or Thiothixene or Tiapride or Tiotixene or Trifluoperazine or Trifluperidol or trifluoperidol or Triflupromazine or trifluperazine or Veralipride or Ziprasidone or Zotepine or Zuclopenthixol).mp. (37053)

2 (Antipsychoti\$ or Anti-psychotic\$ or Neurolepic\$ or Neurolept\$).mp. (33227)

3 neuroleptic drugs/ (17095)

4 or/1-3 (54135)

5 exp Placebo/ (3789)

6 placebo.tw. (30796)

7 or/5-6 (30862)

8 exp Schizophrenia/ (71992)

9 exp psychosis/ (91562)

10 schizo\$.mp. (107980)

11 hebephreni\$.mp. (530)

12 oligophreni\$.mp. (517)

13 psychotic\$.mp. (37181)

14 psychosis.mp. (41536)

15 psychoses.mp. (14369)

16 or/8-15 (150168)

17 ((singl\$ or doubl\$ or trebl\$ or tripl\$) adj (blind\$ or mask\$)).mp. (19669)

18 (random\$ adj5 (assign\$ or allocat\$)).mp. (30325)

19 randomi\$.mp. (48490)

20 crossover.mp. (5171)

21 or/17-20 (83740)

22 7 and 16 and 21 (2094)

23 limit 22 to up=20080101-20140606 (922)

**Database: Embase <1974 to 2014 June 05>**

**Search Strategy:**

-----

1 (Acepromazine or Acetophenazine or Amisulpride or Aripiprazole or Asenapine or Benperidol or Blonanserin or Bromperidol or Butaperazine or Carpipramine or Chlorproethazine or Chlorpromazine or Chlorprothixene or Clozapamine or Clopenthixol or Clopentixol or Clothiapine or Clotiapine or Clozapine or Cyamemazine or Cyamepromazine or Dixyrazine or Droperidol or Fluanisone or Flupehenazine or Flupenthixol or Flupentixol or Fluphenazine or Fluspirilen or Fluspirilene or Haloperidol or Iloperidone or Levomepromazine or Levosulpiride or Lithium or Loxapine or Loxapinsuccinate or Lurasidone or Melperone or Mepazine or Mesoridazine or Methotrimeprazine or Molindone or Moperone or Mosapramine or Olanzapine or Oxypertine or Paliperidone or Penfluridol or Perazine or Periciazine or Pericyazine or Perospirone or Perphenazine or Pimozide or

Pipamperone or Pipothiazine or Pipotiazine or Prochlorperazine or Promazine or Promethazine or Prothipendyl or  
 Quetiapine or Remoxipiride or Reserpine or Risperone or Risperdal or Risperidone or Seroquel or Sertindole or  
 Stelazine or Sulpiride or Sultopride or Thiopropazate or Thioproperazine or Thioridazine or Tiospirone or  
 Thiothixene or Tiapride or Tiotixene or Trifluoperazine or Trifluperidol or trifluoperidol or Triflupromazine  
 or trifluperazine or Veralipride or Ziprasidone or Zotepine or Zuclopenthixol).mp. (253265)  
 2 (Antipsychoti\$ or Anti-psychotic\$ or Neurolepic\$ or Neurolept\$).mp. (96478)  
 3 neuroleptic agent/ (59264)  
 4 or/1-3 (292544)  
 5 exp placebo/ (252940)  
 6 placebo.tw. (201157)  
 7 or/5-6 (329462)  
 8 exp schizophrenia/ (139848)  
 9 exp psychosis/ (215368)  
 10 schizo\$.mp. (173747)  
 11 hebephreni\$.mp. (837)  
 12 oligophreni\$.mp. (1650)  
 13 psychotic\$.mp. (37139)  
 14 psychosis.mp. (96238)  
 15 psychoses.mp. (14607)  
 16 or/8-15 (265465)  
 17 (clin\$ adj2 trial).mp. (993618)  
 18 ((singl\$ or doubl\$ or trebl\$ or tripl\$) adj (blind\$ or mask\$)).mp. (207858)  
 19 (random\$ adj5 (assign\$ or allocat\$)).mp. (114281)  
 20 randomi\$.mp. (692773)  
 21 crossover.mp. (65244)  
 22 exp randomized-controlled-trial/ (345386)  
 23 exp double-blind-procedure/ (115986)  
 24 exp crossover-procedure/ (39104)  
 25 exp single-blind-procedure/ (18341)  
 26 exp randomization/ (62272)  
 27 or/17-26 (1394279)  
 28 4 and 7 and 16 and 27 (5205)  
 29 ("2008??" or "2009??" or "2010??" or "2011??" or "2012??" or "2013??" or "2014??" ).em. (7563542)  
 30 28 and 29 (2593)

## BIOSIS Citation IndexSM

- # 16 **440** #15 AND #14 AND #13 AND #10 AND #1  
*Indexes=BCI Timespan=2008-2014*
- # 15 **36,402** **TOPIC:** ((schizo\* or hebephreni\* or oligophreni\* or psychotic\* or psychosis or psychoses)) **OR TITLE:** ((schizo\* or hebephreni\* or oligophreni\* or psychotic\* or psychosis or psychoses))  
*Indexes=BCI Timespan=2008-2014*
- # 14 **29,564** **TOPIC:** (Placebo\*) **OR TITLE:** (Placebo\*)  
*Indexes=BCI Timespan=2008-2014*
- # 13 **31,966** #12 OR #11  
*Indexes=BCI Timespan=2008-2014*
- # 12 **22,586** **TOPIC:** (Antipsychoti\* or Anti-psychotic\* or Neurolepic\* or Neurolept\*) **OR TITLE:** (Antipsychoti\* or Anti-psychotic\* or Neurolepic\* or Neurolept\*)  
*Indexes=BCI Timespan=2008-2014*
- # 11 **18,913** **TOPIC:** (Acepromazine or Acetophenazine or Amisulpride or Aripiprazole or Asenapine or Benperidol or Blonanserin or Bromperidol or Butaperazine or Carpipramine or Chlorproethazine or Chlorpromazine or Chlorprothixene or Clocapramine or Clopenthixol or Clopentixol or Clothiapine or Clotiapine or Clozapine or Cyamemazine or Cyamepromazine or Dixyrazine or Droperidol or Fluanisone or Flupehenazine or Flupenthixol or Flupentixol or Fluphenazine or Fluspirilen or Fluspirilene or Haloperidol or Iloperidone or Levomepromazine or Levosulpiride or Lithium or Loxapine or Loxapinsuccinate or Lurasidone or Melperone or Mepazine or Mesoridazine or Methotrimeprazine or Molindone or Moperone or Mosapramine or Olanzapine or Oxyperline or Paliperidone or Penfluridol or Perazine or Periciazine or Pericyazine or Perospirone or Perphenazine or Pimozide or Pipamperone or Pipothiazine or Pipotiazine or Prochlorperazine or Promazine or Promethazine or Prothipendyl or Quetiapine or Remoxipiride or Reserpine or Risperone or Risperdal or Risperidone or Seroquel or Sertindole or Stelazine or Sulpiride or Sultopride or Thiopropazate or Thioproperazine or Thioridazine or Tiospirone or Thiothixene or Tiapride or Tiotixene or Trifluoperazine or Trifluoperidol or trifluoperidol or Triflupromazine or trifluperazine or Veralipride or Ziprasidone or Zotepine or Zuclopenthixol) **OR TITLE:** (Acepromazine or Acetophenazine or Amisulpride or Aripiprazole or Asenapine or Benperidol or Blonanserin or Bromperidol or Butaperazine or Carpipramine or Chlorproethazine or Chlorpromazine or Chlorprothixene or Clocapramine or Clopenthixol or Clopentixol or Clothiapine or Clotiapine or Clozapine or Cyamemazine or Cyamepromazine or Dixyrazine or Droperidol or Fluanisone or Flupehenazine or Flupenthixol or Flupentixol or Fluphenazine or Fluspirilen or Fluspirilene or Haloperidol or Iloperidone or Levomepromazine or Levosulpiride or Lithium or Loxapine or Loxapinsuccinate or Lurasidone or Melperone or Mepazine or Mesoridazine or Methotrimeprazine or Molindone or Moperone or Mosapramine or Olanzapine or Oxyperline or Paliperidone or Penfluridol or Perazine or Periciazine or Pericyazine or Perospirone or Perphenazine or Pimozide or Pipamperone or

Pipothiazine or Pipotiazine or Prochlorperazine or Promazine or Promethazine or Prothipendyl or Quetiapine or Remoxipiride or Reserpine or Risperone or Risperdal or Risperidone or Seroquel or Sertindole or Stelazine or Sulpiride or Sultopride or Thiopropazate or Thioproperazine or Thioridazine or Tiospirone or Thiothixene or Tiapride or Tiotixene or Trifluoperazine or Trifluoperidol or trifluoperidol or Triflupromazine or trifluperazine or Veralipride or Ziprasidone or Zotepine or Zuclopenthixol)

*Indexes=BCI Timespan=2008-2014*

- # 10 **100,084** #9 OR #8 OR #7 OR #6 OR #3 OR #2  
*Indexes=BCI Timespan=2008-2014*
- # 9 **8,718** TS=crossover\* OR TI=crossover\*  
*Indexes=BCI Timespan=2008-2014*
- # 8 **118** TS=(randomi\* Near/1 assign\*) or TI=(randomi\* Near/1 assign\*)  
*Indexes=BCI Timespan=2008-2014*
- # 7 **22** TS=(randomi\* Near/1 allocate\*) or TI=(randomi\* Near/1 allocate\*)  
*Indexes=BCI Timespan=2008-2014*
- # 6 **24,582** #5 AND #4  
*Indexes=BCI Timespan=2008-2014*
- # 5 **48,336** TS=(mask\* OR blind\*) OR TI=(mask\* OR blind\*)  
*Indexes=BCI Timespan=2008-2014*
- # 4 **535,073** TS=(singl\* OR Doubl\* OR Tripl\* OR Trebl\*) OR TI=(singl\* OR Doubl\* OR Tripl\* OR Trebl\*)  
*Indexes=BCI Timespan=2008-2014*
- # 3 **88,783** TI=(randomi\*) OR TS=(randomi\*)  
*Indexes=BCI Timespan=2008-2014*
- # 2 **55,789** TS=(Randomized clinical trial\*) OR TI=(Randomized clinical trial\*)  
*Indexes=BCI Timespan=2008-2014*
- # 1 **1,990,883** TA=(Hominidae)  
*Indexes=BCI Timespan=2008-2014*

### Search phrases Clinicaltrials.gov 09-06-14

schizophrenia and placebo and random | Interventional Studies | received from 01/01/2008 to 06/12/2014 = 471

psychosis and placebo and random and antipsychotic | Interventional Studies | received from 01/01/2008 to 06/12/2014 = 384



psychosis and placebo and random and Acepromazine | Interventional Studies | received from 01/01/2008 to 06/12/2014 = 0

psychosis and placebo and random and Acetophenazine | Interventional Studies | received from 01/01/2008 to 06/12/2014 = 0

psychosis and placebo and random and Amisulpride | Interventional Studies | received from 01/01/2008 to 06/12/2014 = 10

psychosis and placebo and random and Aripiprazole | Interventional Studies | received from 01/01/2008 to 06/12/2014 = 45

psychosis and placebo and random and Asenapine | Interventional Studies | received from 01/01/2008 to 06/12/2014 = 7

psychosis and placebo and random and Benperidol | Interventional Studies | received from 01/01/2008 to 06/12/2014 = 1

psychosis and placebo and random and Blonanserin | Interventional Studies | received from 01/01/2008 to 06/12/2014 = 0

psychosis and placebo and random and Bromperidol | Interventional Studies | received from 01/01/2008 to 06/12/2014 = 0

psychosis and placebo and random and Butaperazine | Interventional Studies | received from 01/01/2008 to 06/12/2014 = 0

psychosis and placebo and random and Carpipramine | Interventional Studies | received from 01/01/2008 to 06/12/2014 = 0

psychosis and placebo and random and Chlorproethazine | Interventional Studies | received from 01/01/2008 to 06/12/2014 = 0

psychosis and placebo and random and Chlorpromazine | Interventional Studies | received from 01/01/2008 to 06/12/2014 = 4

psychosis and placebo and random and Chlorprothixene | Interventional Studies | received from 01/01/2008 to 06/12/2014 = 0

psychosis and placebo and random and Clocapramine | Interventional Studies | received from 01/01/2008 to 06/12/2014 = 0

psychosis and placebo and random and Clopenthixol | Interventional Studies | received from 01/01/2008 to 06/12/2014 = 1

psychosis and placebo and random and Clopentixol | Interventional Studies | received from 01/01/2008 to 06/12/2014 = 0

psychosis and placebo and random and Clothiapine | Interventional Studies | received from 01/01/2008 to 06/12/2014 = 1

psychosis and placebo and random and Clotiapine | Interventional Studies | received from 01/01/2008 to 06/12/2014 = 1

psychosis and placebo and random and Clozapine | Interventional Studies | received from 01/01/2008 to 06/12/2014 = 26

psychosis and placebo and random and Cyamemazine | Interventional Studies | received from 01/01/2008 to 06/12/2014 = 1  
psychosis and placebo and random and Cyamepromazine | Interventional Studies | received from 01/01/2008 to 06/12/2014 = 1  
psychosis and placebo and random and Dixyrazine | Interventional Studies | received from 01/01/2008 to 06/12/2014 = 0  
psychosis and placebo and random and Droperidol | Interventional Studies | received from 01/01/2008 to 06/12/2014 = 0  
psychosis and placebo and random and Fluanisone | Interventional Studies | received from 01/01/2008 to 06/12/2014 = 0  
psychosis and placebo and random and Flupehenazine | Interventional Studies | received from 01/01/2008 to 06/12/2014 = 0  
psychosis and placebo and random and Flupenthixol | Interventional Studies | received from 01/01/2008 to 06/12/2014 = 1  
psychosis and placebo and random and Flupentixol | Interventional Studies | received from 01/01/2008 to 06/12/2014 = 1  
psychosis and placebo and random and Fluphenazine | Interventional Studies | received from 01/01/2008 to 06/12/2014 = 2  
psychosis and placebo and random and Fluspirilen | Interventional Studies | received from 01/01/2008 to 06/12/2014 = 0  
psychosis and placebo and random and Fluspirilene | Interventional Studies | received from 01/01/2008 to 06/12/2014 = 0  
psychosis and placebo and random and Haloperidol | Interventional Studies | received from 01/01/2008 to 06/12/2014 = 14  
psychosis and placebo and random and Iloperidone | Interventional Studies | received from 01/01/2008 to 06/12/2014 = 3  
psychosis and placebo and random and Levomepromazine | Interventional Studies | received from 01/01/2008 to 06/12/2014 = 1  
psychosis and placebo and random and Levosulpiride | Interventional Studies | received from 01/01/2008 to 06/12/2014 = 0  
psychosis and placebo and random and Lithium | Interventional Studies | received from 01/01/2008 to 06/12/2014 = 31  
psychosis and placebo and random and Loxapine | Interventional Studies | received from 01/01/2008 to 06/12/2014 = 1  
psychosis and placebo and random and Loxapinsuccinate | Interventional Studies | received from 01/01/2008 to 06/12/2014 = 1  
psychosis and placebo and random and Lurasidone | Interventional Studies | received from 01/01/2008 to 06/12/2014 = 16  
psychosis and placebo and random and Melperone | Interventional Studies | received from 01/01/2008 to 06/12/2014 = 1  
psychosis and placebo and random and Mepazine | Interventional Studies | received from 01/01/2008 to 06/12/2014 = 0

psychosis and placebo and random and Mesoridazine | Interventional Studies | received from 01/01/2008 to 06/12/2014 = 0

psychosis and placebo and random and Methotrimeprazine | Interventional Studies | received from 01/01/2008 to 06/12/2014 = 1

psychosis and placebo and random and Molindone | Interventional Studies | received from 01/01/2008 to 06/12/2014 = 1

psychosis and placebo and random and Moperone | Interventional Studies | received from 01/01/2008 to 06/12/2014 = 0

psychosis and placebo and random and Mosapramine | Interventional Studies | received from 01/01/2008 to 06/12/2014 = 0

psychosis and placebo and random and Olanzapine | Interventional Studies | received from 01/01/2008 to 06/12/2014 = 48

psychosis and placebo and random and Oxypertine | Interventional Studies | received from 01/01/2008 to 06/12/2014 = 0

psychosis and placebo and random and Paliperidone | Interventional Studies | received from 01/01/2008 to 06/12/2014 = 25

psychosis and placebo and random and Penfluridol | Interventional Studies | received from 01/01/2008 to 06/12/2014 = 0

psychosis and placebo and random and Perazine | Interventional Studies | received from 01/01/2008 to 06/12/2014 = 0

psychosis and placebo and random and Periciazine | Interventional Studies | received from 01/01/2008 to 06/12/2014 = 0

psychosis and placebo and random and Pericyazine | Interventional Studies | received from 01/01/2008 to 06/12/2014 = 0

psychosis and placebo and random and Perospirone | Interventional Studies | received from 01/01/2008 to 06/12/2014 = 0

psychosis and placebo and random and Perphenazine | Interventional Studies | received from 01/01/2008 to 06/12/2014 = 1

psychosis and placebo and random and Pimozide | Interventional Studies | received from 01/01/2008 to 06/12/2014 = 0

psychosis and placebo and random and Pipamperone | Interventional Studies | received from 01/01/2008 to 06/12/2014 = 3

psychosis and placebo and random and Pipothiazine | Interventional Studies | received from 01/01/2008 to 06/12/2014 = 0

psychosis and placebo and random and Pipotiazine | Interventional Studies | received from 01/01/2008 to 06/12/2014 = 0

psychosis and placebo and random and Prochlorperazine | Interventional Studies | received from 01/01/2008 to 06/12/2014 = 0

psychosis and placebo and random and Promazine | Interventional Studies | received from 01/01/2008 to 06/12/2014 = 0

psychosis and placebo and random and Promethazine | Interventional Studies | received from 01/01/2008 to 06/12/2014 = 12

psychosis and placebo and random and Prothipendyl | Interventional Studies | received from 01/01/2008 to 06/12/2014 = 0

psychosis and placebo and random and Quetiapine | Interventional Studies | received from 01/01/2008 to 06/12/2014 = 50

psychosis and placebo and random and Remoxipiride | Interventional Studies | received from 01/01/2008 to 06/12/2014 = 0

psychosis and placebo and random and Reserpine | Interventional Studies | received from 01/01/2008 to 06/12/2014 = 0

psychosis and placebo and random and Risperone | Interventional Studies | received from 01/01/2008 to 06/12/2014 = 0

psychosis and placebo and random and Risperdal | Interventional Studies | received from 01/01/2008 to 06/12/2014 = 69

psychosis and placebo and random and Risperidone | Interventional Studies | received from 01/01/2008 to 06/12/2014 = 69

psychosis and placebo and random and Seroquel | Interventional Studies | received from 01/01/2008 to 06/12/2014 = 50

psychosis and placebo and random and Sertindole | Interventional Studies | received from 01/01/2008 to 06/12/2014 = 0

psychosis and placebo and random and Stelazine | Interventional Studies | received from 01/01/2008 to 06/12/2014 = 0

psychosis and placebo and random and Sulpiride | Interventional Studies | received from 01/01/2008 to 06/12/2014 = 6

psychosis and placebo and random and Sultopride | Interventional Studies | received from 01/01/2008 to 06/12/2014 = 10

psychosis and placebo and random and Thiopropazate | Interventional Studies | received from 01/01/2008 to 06/12/2014 = 0

psychosis and placebo and random and Thioproperazine | Interventional Studies | received from 01/01/2008 to 06/12/2014 = 0

psychosis and placebo and random and Thioridazine | Interventional Studies | received from 01/01/2008 to 06/12/2014 = 0

psychosis and placebo and random and Tiospirone | Interventional Studies | received from 01/01/2008 to 06/12/2014 = 0

psychosis and placebo and random and Thiothixene | Interventional Studies | received from 01/01/2008 to 06/12/2014 = 0

psychosis and placebo and random and Tiapride | Interventional Studies | received from 01/01/2008 to 06/12/2014 = 1

psychosis and placebo and random and Tiotixene | Interventional Studies | received from 01/01/2008 to 06/12/2014 = 0

psychosis and placebo and random and Trifluoperazine | Interventional Studies | received from 01/01/2008 to 06/12/2014 = 0

psychosis and placebo and random and Trifluoperidol | Interventional Studies | received from 01/01/2008 to 06/12/2014 = 0

psychosis and placebo and random and trifluoperidol | Interventional Studies | received from 01/01/2008 to 06/12/2014 = 0

psychosis and placebo and random and Triflupromazine | Interventional Studies | received from 01/01/2008 to 06/12/2014 = 0

psychosis and placebo and random and trifluperazine | Interventional Studies | received from 01/01/2008 to 06/12/2014 = 0

psychosis and placebo and random and Veralipride | Interventional Studies | received from 01/01/2008 to 06/12/2014 = 0

psychosis and placebo and random and Ziprasidone | Interventional Studies | received from 01/01/2008 to 06/12/2014 = 15

psychosis and placebo and random and Zotepine | Interventional Studies | received from 01/01/2008 to 06/12/2014 = 0

psychosis and placebo and random and Zuclophenthixol | Interventional Studies | received from 01/01/2008 to 06/12/2014 = 1

**Search phrases Platform of the World Health Organisation (<http://apps.who.int/trialsearch/>). 09-06-14**

237 trials found for: schizo\* and placebo and random\* limited to 2008-2014

116 trials found for: psycho\* and placebo and random\* limited to 2008-2014

## **2. Search in the register of controlled trials of the Cochrane Schizophrenia Group.**

This register was only available to us in its version August 2009. To avoid missing articles that had come up only in 2009, we included the year 2008 in the search of the databases above.

The search term was “placebo” in the fields, title, abstract, index field or keyword

The Cochrane schizophrenia group regularly searches of more than 15 databases, clinical trial registers, hand searches and conference proceedings. The detailed search strategy can be found at the homepage of the Cochrane schizophrenia group (<http://szg.cochrane.org/cszg-specialised-register>). To search this register was particularly important for identifying old schizophrenia studies.

## **3. Search of included studies in other reviews**

We searched the following previous reviews, for which extensive searches had also be undertaken. In particular the reviews of our group had also searched the documents that pharmaceutical companies had sent to the FDA for the approval of their compounds

- 1.) Klein DF, Davis JM. Diagnosis and drug treatment of psychiatric disorders. Baltimore: Williams and Wilkins; 1969
- 2.) Agid O, Siu CO, Potkin SG, et al. Meta-regression analysis of placebo response in antipsychotic trials, 1970-2010. *Am J Psychiatry* 2013;170:1335-44.
- 3.) Leucht S, Arbter D, Engel RR, Kissling W, Davis JM. How effective are second-generation antipsychotic drugs? A meta-analysis of placebo-controlled trials. *Mol Psychiatry* 2009a;14:429-47
- 4.) Adams CE, Awad G, Rathbone J. Chlorpromazine versus placebo for schizophrenia. *Cochrane Database of Systematic Reviews* 2007
- 5.) Joy CB, Adams CE, Lawrie SM. Haloperidol versus placebo for schizophrenia. *Cochrane Database Syst Rev* 2006:CD003082
- 6.) Shen X, Xia J, Adams CE. Flupenthixol versus placebo for schizophrenia. *Cochrane Database Syst Rev* 2012;11:CD009777

- 7.) Matar HE, Almerie MQ. Oral fluphenazine versus placebo for schizophrenia. Cochrane Database Syst Rev 2007:CD006352
- 8.) Hartung B, Wada M, Laux G, Leucht S. Perphenazine for schizophrenia. Cochrane Database of Systematic Reviews 2005:CD003443
- 9.) Omori IM, Wang J. Sulpiride versus placebo for schizophrenia. Cochrane Database Syst Rev 2009:CD007811
- 10.) Fenton M, Rathbone J, Reilly J, Sultana A. Thioridazine for schizophrenia. Cochrane Database Syst Rev 2007:CD001944

## **Supplementary Figure S1**

**Description of the search process (PRISMA diagram)**



**Supplementary Figure S1** PRISMA diagram of the search process

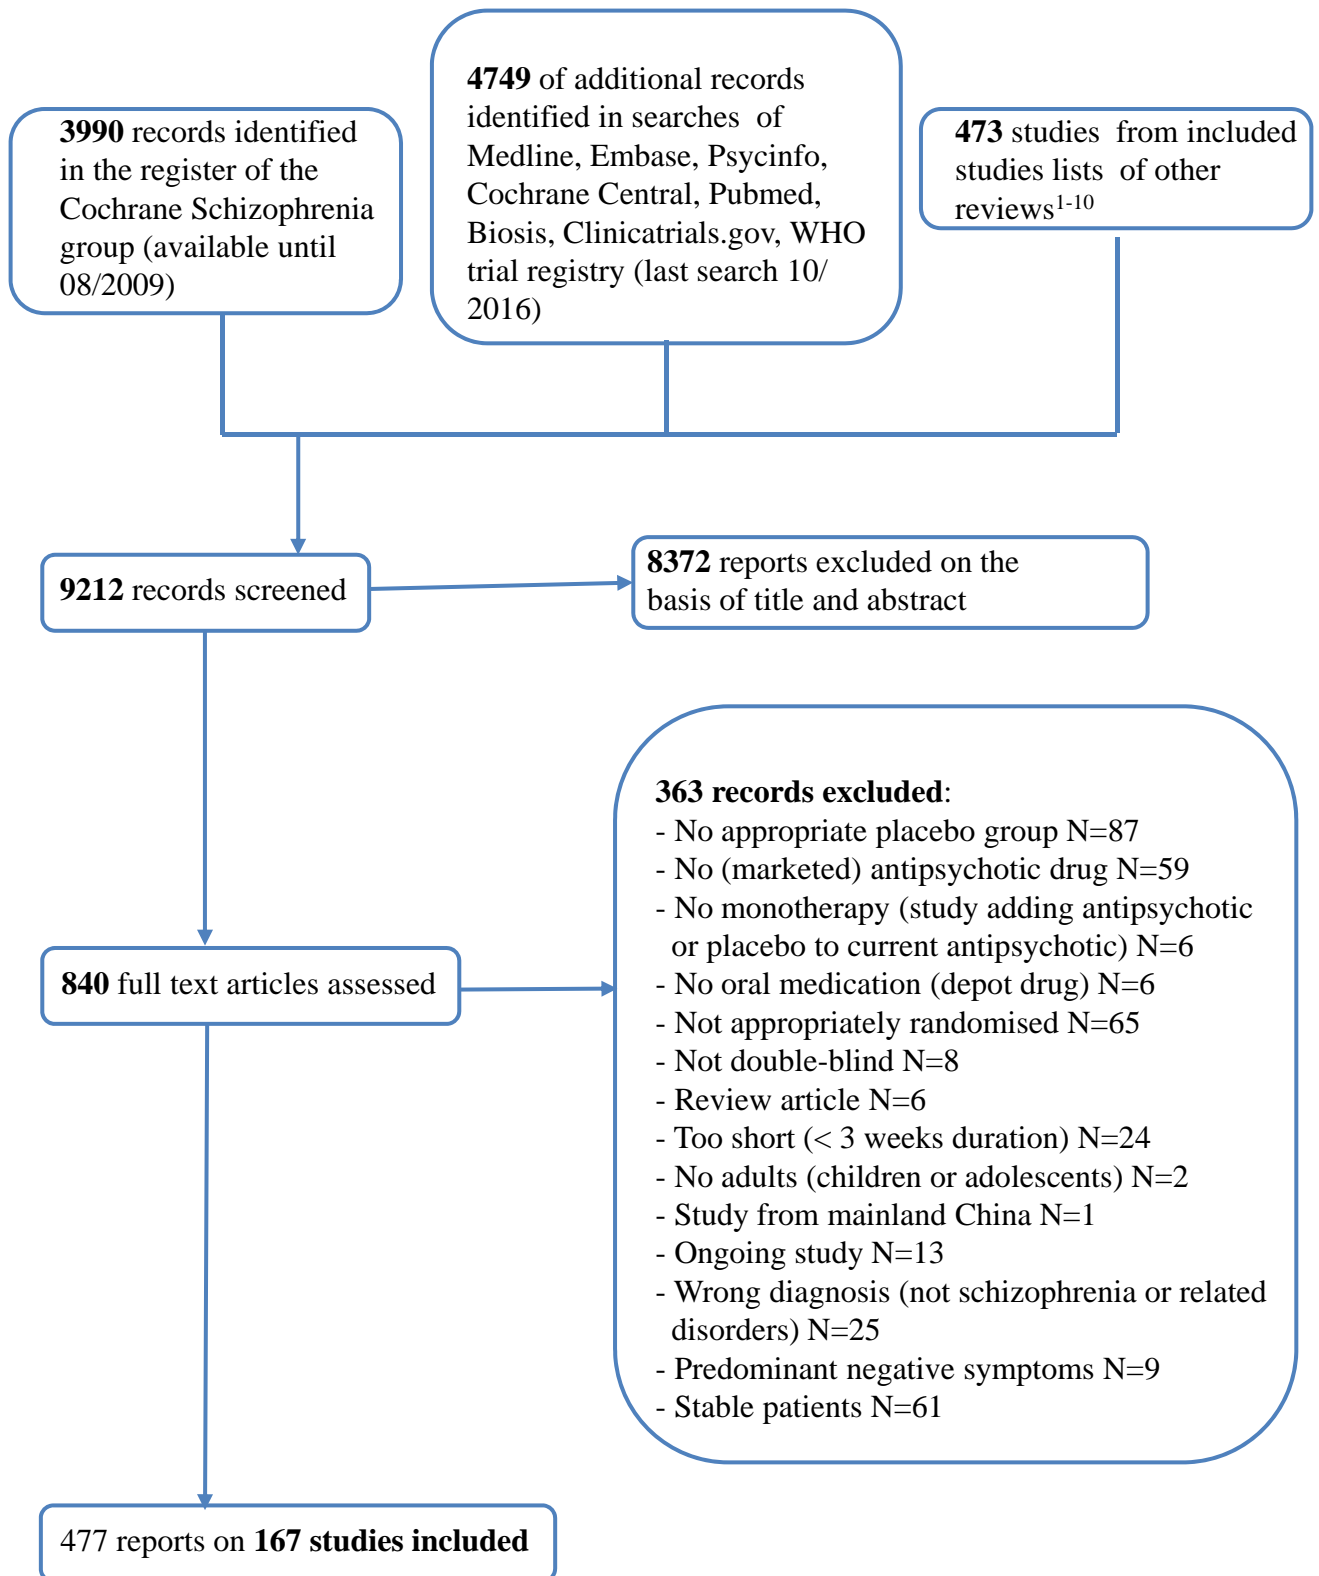

## References:

- 1.) Klein DF, Davis JM. Diagnosis and drug treatment of psychiatric disorders. Baltimore: Williams and Wilkins; 1969
- 2.) Agid O, Siu CO, Potkin SG, et al. Meta-regression analysis of placebo response in antipsychotic trials, 1970-2010. *Am J Psychiatry* 2013;170:1335-44.
- 3.) Leucht S, Arbter D, Engel RR, Kissling W, Davis JM. How effective are second-generation antipsychotic drugs? A meta-analysis of placebo-controlled trials. *Mol Psychiatry* 2009a;14:429-47
- 4.) Adams CE, Awad G, Rathbone J. Chlorpromazine versus placebo for schizophrenia. *Cochrane Database of Systematic Reviews* 2007
- 5.) Joy CB, Adams CE, Lawrie SM. Haloperidol versus placebo for schizophrenia. *Cochrane Database Syst Rev* 2006:CD003082
- 6.) Shen X, Xia J, Adams CE. Flupenthixol versus placebo for schizophrenia. *Cochrane Database Syst Rev* 2012;11:CD009777
- 7.) Matar HE, Almerie MQ. Oral fluphenazine versus placebo for schizophrenia. *Cochrane Database Syst Rev* 2007:CD006352
- 8.) Hartung B, Wada M, Laux G, Leucht S. Perphenazine for schizophrenia. *Cochrane Database of Systematic Reviews* 2005:CD003443
- 9.) Omori IM, Wang J. Sulpiride versus placebo for schizophrenia. *Cochrane Database Syst Rev* 2009:CD007811
- 10.) Fenton M, Rathbone J, Reilly J, Sultana A. Thioridazine for schizophrenia. *Cochrane Database Syst Rev* 2007:CD001944

## **Supplementary Table S4**

### **Description of included studies**

**Table S4: Description of included studies**

*Numbers in squared brackets refer to doses that have not been analysed, neither in the primary analysis nor in a sensitivity analysis. The number of references is lower than the number of included studies, because some publications reported on two or more studies*

| Study                              | Antipsychotics and daily dose in mg, on flexible dosage mean value (range)          | N                                  | Duration in weeks | Mean duration of illness in years | Diagnosis                                                                 |
|------------------------------------|-------------------------------------------------------------------------------------|------------------------------------|-------------------|-----------------------------------|---------------------------------------------------------------------------|
| Adelson 1962 <sup>1</sup>          | CPZ 1800 (-3000)<br>PERP 181 (-750)<br>PROC 338 (-450)<br>TRIFLUP 621 (-240)<br>PBO | 48<br>48<br>48<br>48<br>48         | 17                | n.i.                              | Chronic schizophrenia (clinical diagnosis)                                |
| Ahmed et al. 2007 <sup>2</sup>     | OLA 15<br>PBO<br>[Bifeprunox 20; 30]                                                | 150<br>150<br>[154; 150]           | 6                 | n.i.                              | Schizophrenia in acute exacerbation (DSM-IV-TR)                           |
| Arvanitis et al. 1997 <sup>3</sup> | QUE 300; 600; 750<br>[75; 150]<br>HAL 12<br>PBO                                     | 52; 51; 54<br>[50; 48]<br>52<br>51 | 6                 | 15                                | Acute exacerbation of (sub-) chronic schizophrenia (DSM-III-R)            |
| Augustin 1996 <sup>4</sup>         | HAL n.i.<br>PBO                                                                     | 18<br>18                           | 6                 | n.i.                              | Schizophrenia (n.i.)                                                      |
| Baker 1959 <sup>5</sup>            | CPZ 270 (300)<br>PBO<br>[Ethylcrotonylurea 1200]                                    | 7<br>8<br>10                       | 5                 | n.i.                              | Schizophrenia (clinical diagnosis)                                        |
| Ban et al. 1975e <sup>6</sup>      | CPZ n.i. (200-800)<br>PBO<br>THIOT n.i. (10-40)                                     | 10<br>10<br>10                     | 12                | n.i.                              | Schizophrenia (clinical diagnosis)                                        |
| Barbato et al. 2007c <sup>7</sup>  | OLA 15<br>PBO<br>[Bifeprunox 20; 30]                                                | 150<br>145<br>[149; 146]           | 6                 | n.i.                              | Schizophrenia in acute exacerbation (DSM-IV)                              |
| Barbato et al. 2007d <sup>7</sup>  | HAL 10<br>PBO<br>[Bifeprunox 1; 10]                                                 | 52<br>51<br>[59; 46]               | 6                 | n.i.                              | Schizophrenia in acute exacerbation (DSM-IV)                              |
| Barron 1963 <sup>8</sup>           | CARP n.i. (75-150)<br>PBO                                                           | 10<br>10                           | n.i.              | n.i.                              | Schizophrenic reaction (1 chronic brain syndrome with psychotic reaction) |
| Beasley et al. 1996a <sup>9</sup>  | OLA 10<br>[1]<br>PBO                                                                | 50<br>[52]<br>50                   | 6                 | 16                                | Schizophrenia with an acute exacerbation (DSM-III-R)                      |
| Beasley et al. 1996b <sup>10</sup> | OLA 10±2.5; 15±2.5<br>[5±2.5]<br>HAL 14.0<br>PBO                                    | 64; 69<br>[65]<br>69<br>68         | 6                 | 14                                | Acute exacerbation of schizophrenia (DSM-III-R)                           |
| Bechelli et al. 1983 <sup>11</sup> | HAL 11.5 (10-20)<br>PIP 21.4 (20-40)<br>PBO                                         | 30<br>29<br>31                     | 4                 | n.i.                              | Acute schizophrenia (ICD-9)                                               |

|                                                            |                                                                       |                               |    |       |                                                                |
|------------------------------------------------------------|-----------------------------------------------------------------------|-------------------------------|----|-------|----------------------------------------------------------------|
| Bishop 1964 <sup>12</sup>                                  | BUTA n.i. (0-200)<br>TRIFLUP n.i. (0-40)<br>PBO                       | 14<br>14<br>14                | 10 | 12.5  | Chronic schizophrenia (clinical diagnosis)                     |
| Bishop and Gallant 1963c <sup>13</sup>                     | CPZ n.i. (≤800)<br>PBO<br>[Benzquinamide]                             | 10<br>10<br>[10]              | 10 | n.i.  | Chronic schizophrenia (clinical diagnosis)                     |
| Borison et al. 1989 <sup>14</sup>                          | HAL n.i. (15-75)<br>PBO<br>TIOS n.i. (45-225)<br>THIOR n.i. (150-750) | 8<br>8<br>[8]<br>[8]          | 6  | n.i.  | Schizophrenia (DSM-III), acutely exacerbated                   |
| Borison et al. 1991a <sup>15</sup>                         | CPZ 800 (400-1600)<br>PBO                                             | 9<br>10                       | 4  | n.i.  | Schizophrenia (DSM-III) in acute exacerbation                  |
| Borison et al. 1992 <sup>16</sup>                          | RIS 7.8 (2-10)<br>HAL 15.0 (4-20)<br>PBO                              | 53<br>53<br>54                | 6  | 15    | Schizophrenia (DSM-III-R)                                      |
| Borison et al. 1996 <sup>17</sup>                          | QUE 307 (75-750)<br>PBO                                               | 54<br>55                      | 6  | 15    | Acute exacerbation of (sub-) chronic schizophrenia (DSM-III-R) |
| Bugarski-Kirola 2014 <sup>18</sup>                         | OLA 15<br>PBO<br>[Bitopterin 10; 30]                                  | 63<br>80<br>[80;77]           | 4  | 13.3  | Acute exacerbation of schizophrenia (DSM-IV)                   |
| Canuso et al. 2010 <sup>19</sup><br>(Johnson NCT00397033)  | PAL 7.5 (6; 9)<br>PBO                                                 | 209 (109; 100)<br>107         | 6  | 4.8   | Acute episode of schizoaffective disorder (DSM-IV)             |
| Canuso et al. 2010a <sup>20</sup><br>(Johnson NCT00412373) | PAL n.i. (3-12)<br>PBO                                                | 216<br>95                     | 6  | n.i.  | Acute episode of schizoaffective disorder (DSM-IV)             |
| Casey 1960 <sup>21</sup>                                   | CPZ 400<br>PBO                                                        | 170<br>178                    | 10 | n.i.  | Schizophrenic reaction (clinical diagnosis)                    |
| Casey et al. 2008 <sup>22</sup>                            | RIS 6<br>PBO<br>[Bifeprunox 5; 10; 20]                                | 120<br>119<br>[115; 120; 115] | 6  | n.i.  | Acute exacerbation of schizophrenia (DSM-IV-TR)                |
| Charalampous 1974 <sup>23</sup>                            | LOX 147.5 (50-150)<br>THIOT 51.9 (20-60)<br>PBO                       | 20<br>21<br>19                | 4  | 2.5   | Schizophrenia (clinical diagnosis)                             |
| Chouinard 1975 <sup>24</sup>                               | PERP 20<br>PBO                                                        | 24<br>24                      | 12 | 11.1  | Schizophrenia (RDC)                                            |
| Chouinard 1990 <sup>25</sup>                               | CPZ 555 (300-1200)<br>PBO<br>[Remoxipride]                            | 21<br>21<br>[20]              | 4  | 13.95 | Schizophrenia (DSM-III)                                        |
| Chouinard et al. 1993 <sup>26</sup>                        | RIS 6<br>[2;10;16]<br>HAL 20<br>PBO                                   | 22<br>[24;22;24]<br>21<br>22  | 8  | 16    | Chronic Schizophrenia (DSM-III-R)                              |
| Clark 1968 (01383) <sup>27</sup>                           | CPZ 663(258-835)<br>TRIFLUP 6.7 (5.1-8.3)<br>PBO<br>No drug           | 18<br>18<br>18<br>18          | 14 | 15.2  | Chronic schizophrenia (clinical diagnosis)                     |

|                                                         |                                                                             |                                 |    |       |                                                                                    |
|---------------------------------------------------------|-----------------------------------------------------------------------------|---------------------------------|----|-------|------------------------------------------------------------------------------------|
| Clark 1968 <sup>28</sup>                                | CPZ 842.3 [<1000]<br>BUTA 81.1 [<100]<br>PBO                                | 23<br>23<br>23                  | 16 | 19    | Chronic schizophrenia (clinical diagnosis)                                         |
| Clark 1969 <sup>29</sup>                                | CPZ n.i. (200-1600)<br>HAL (3-15)<br>PBO                                    | 14<br>14<br>16                  | 12 | n.i.  | Chronic schizophrenia (criteria n.i.)                                              |
| Clark 1975 <sup>30</sup>                                | Loxapine 71 (-100)<br>TRIFLU 36<br>(-50)<br>Placebo                         | 15<br>15<br>13                  | 4  | 8.98  | Chronic schizophrenia (clinical diagnosis)                                         |
| Clark 1977 <sup>31</sup>                                | LOX 47.2 (-50)<br>LOX 93.1 (-100)<br>PBO                                    | 13<br>12<br>13                  | 12 | 17.5  | Chronic schizophrenia (DSM-II)                                                     |
| Clark et al. 1970a <sup>32</sup>                        | CPZ 684 (200-1000)<br>PBO<br>MOL                                            | 15<br>14<br>15                  | 12 | n.i.  | Chronic schizophrenia (clinical diagnosis), inpatients                             |
| Clark et al. 1970b <sup>33</sup>                        | CPZ 459 (300; 600)<br>[150]<br>PBO                                          | Unclear<br>[unclear]<br>unclear | 12 | 16.6  | Chronic schizophrenia (clinical diagnosis)                                         |
| Clark et al. 1971a <sup>34</sup>                        | CPZ 718 (-1000)<br>PBO<br>FLUPH 7.3 (-10)<br>THIOR 760 (-1000)              | 23<br>21                        | 4  | n.i.  | Chronic schizophrenia (clinical diagnosis), newly admitted and acutely exacerbated |
| Clark et al. 1972 <sup>35</sup>                         | CPZ 817 (-1000)<br>PBO<br>Loxapine 80.6 (-100)                              | 19<br>18<br>[18]                | 13 | n.i.  | Chronic schizophrenia (clinical diagnosis)                                         |
| Clark et al. 1977a <sup>36</sup>                        | CPZ n.i. (100-1000)<br>BUTA<br>PBO                                          | 9<br>9<br>9                     | 12 | 21.78 | Chronic schizophrenia (clinical diagnosis)                                         |
| Cockburn 1959 <sup>37</sup>                             | RES 4<br>PBO<br>Extract of Alstonia Constricta                              | 10<br>10<br>10                  | 4  | n.i.  | Schizophrenia (clinical diagnosis)                                                 |
| Cole 1964 <sup>38</sup>                                 | CPZ 654.8 (200-1600)<br>FLUPH 6.4 (2-16)<br>THIOR 700 (200-1600)<br>PBO     | 112<br>115<br>111<br>125        | 6  | 2.7   | Acute schizophrenia (clinical diagnosis)                                           |
| Cooper et al. 2000a <sup>39</sup>                       | ZOT 241 (300, reduceable to 150)<br>CPZ 532 (600, reduceable to 300)<br>PBO | 53<br>53<br>53                  | 8  | 11    | Acute exacerbation of (sub-) chronic schizophrenia (DSM-III-R)                     |
| Cooper et al. 2000b <sup>40</sup>                       | ZOT n.i. (150-300)<br>PBO                                                   | 63<br>58                        | 26 | 14    | Chronic schizophrenia (DSM-III-R)                                                  |
| Coppola et al. 2011 <sup>41</sup> (Johnson NCT00524043) | PAL 6<br>[1.5]<br>PBO                                                       | 70<br>[66]<br>65                | 6  | n.i.  | Acute episode of schizophrenia (DSM-IV)                                            |
| Correll et al. 2015 <sup>42</sup>                       | BRE 0.25;2;4<br>PBO                                                         | 90;182;180<br>184               | 6  | 12.7  | Schizophrenia (DSM-IV-TR)                                                          |
| Corrigan et al. 2004 <sup>43</sup>                      | OLA 15<br>PBO                                                               | 93<br>87                        | 6  | 13    | Schizophrenia (DSM-IV)                                                             |

|                                       |                                                      |                                |    |       |                                                                                           |
|---------------------------------------|------------------------------------------------------|--------------------------------|----|-------|-------------------------------------------------------------------------------------------|
| Cutler et al. 2006 <sup>44</sup>      | ARI 10<br>[2; 5]<br>PBO                              | 94<br>[93; 92]<br>88           | 6  | n.i.  | Hospitalized patients in acute relapse of schizophrenia (DSM-IV)                          |
| Cutler et al. 2008 <sup>45</sup>      | ILO 24<br>PBO<br>ZIP 160                             | 303<br>152<br>151              | 4  | n.i.  | Schizophrenia (DSM-IV)                                                                    |
| Cutler et al. 2010 <sup>46</sup>      | QUE XR400; XR600;<br>XR800; IR800<br>PBO             | 114;<br>105;113;<br>116<br>117 | 6  | 17.7  | Acute exacerbation of schizophrenia (DSM-IV)                                              |
| Daniel et al. 1999 <sup>47</sup>      | ZIP 80; 160<br>PBO                                   | 106; 104<br>92                 | 6  | 14    | Acute exacerbation of (sub-)chronic schizophrenia or schizoaffective disorder (DSM-III-R) |
| Davidson et al. 2007 <sup>48</sup>    | OLA 10<br>PAL 9 [3;15]<br>PBO                        | 128<br>125<br>[127;115]<br>123 | 6  | 11.9  | Acute episode of schizophrenia (DSM-IV)                                                   |
| Downing 2014 <sup>49</sup>            | RIS 4<br>[LY 40; 80]<br>PBO                          | 142<br>[292;280]<br>295        | 6  | 14.7  | Schizophrenia (DSM-IV)                                                                    |
| Durgam et al. 2014 <sup>50</sup>      | CAR 1.5;3;4.5<br>RIS 4<br>PBO                        | 145;146;147<br>140<br>151      | 6  | 11.6  | Schizophrenia (DSM-IV-TR), all subtypes                                                   |
| Egan 2013 <sup>51</sup>               | OLA 15<br>PBO<br>[(MK-8998) 16 ]                     | 47<br>83<br>86                 | 4  | 10.88 | Schizophrenia (DSM-IV-TR)                                                                 |
| Engelhardt 1969 <sup>52</sup>         | CPZ 180 (50-800)<br>[Promazine 180 (50-800) ]<br>PBO | 103<br>[109]<br>99             | 12 | n.i.  | Chronic schizophrenia (clinical diagnosis)                                                |
| Evans 1972 <sup>53</sup>              | THIOR 400<br>PBO                                     | 27<br>27                       | 3  | n.i.  | Schizophrenia (newly hospitalised, clinical diagnosis)                                    |
| Fabre 1995 <sup>54</sup>              | QUE 113(25-250)<br>PBO                               | 8<br>4                         | 3  | 12    | (Sub-)chronic schizophrenia (DSM-III-R)                                                   |
| Finkle 1965 <sup>55</sup>             | CPZ n.i. (300-600)<br>PBO                            | 48<br>49                       | 4  | n.i.  | Chronic schizophrenia (clinical diagnosis)                                                |
| Fleming et al. 1959 <sup>56</sup>     | CPZ 112.5 (n.i.)<br>PBO<br>[Promazine 203]           | 12<br>12<br>[12]               | 4  | 16.7  | Chronic schizophrenia (clinical diagnosis)                                                |
| Gallant 1963 <sup>57</sup>            | CPZ n.i. (-800)<br>PBO                               | n.i.                           | 12 | n.i.  | Chronic schizophrenia (clinical diagnosis)                                                |
| Garcia et al. 2009 <sup>58</sup>      | HAL 10<br>PBO<br>[BLO 2.5; 5; 10]                    | 60<br>64<br>[61; 58;<br>64]    | 6  | n.i.  | Schizophrenia (acute exacerbation) (DSM-IV-TR)                                            |
| Garry and Leonard 1962b <sup>59</sup> | HAL 4.2 (slowly increased)<br>PBO                    | 26<br>26                       | 12 | 14.5  | Chronic schizophrenia (paranoid, catatonic, hebephrenic, simple) (clinical diagnosis)     |
| Geffen et al. 2012 <sup>60</sup>      | RIS n.i. (2-8)<br>PBO<br>[BL-1020 (10;20-30)]        | 91<br>93<br>[179]              | 6  | 8.6   | Chronic Schizophrenia (DSM-IV-TR) with acute exacerbation within 30 days                  |
| Goldberg 1972 <sup>61</sup>           | CPZ 680 (200-1600)<br>ACE 146 (40-320)<br>PBO        | n.i.                           | 5  | n.i.  | Acute schizophrenia (clinical diagnosis)                                                  |
| Hall et al. 1955 <sup>62</sup>        | CPZ n.i. ( $\leq$ 750)<br>PBO                        | 87<br>88                       | 9  | n.i.  | Chronic schizophrenia (clinical diagnosis)                                                |

|                                       |                                                     |                                |    |      |                                                                       |
|---------------------------------------|-----------------------------------------------------|--------------------------------|----|------|-----------------------------------------------------------------------|
| Hamilton 1960 <sup>63</sup>           | CPZ 300<br>PBO<br>[Thiopropazate 30]                | 18<br>18<br>[18]               | 8  | n.i. | Chronic schizophrenia (clinical diagnosis)                            |
| Hamilton 1963 <sup>64</sup>           | TRIFLU n.i.<br>PROC n.i.<br>PBO n.i.                | 21<br>21<br>21                 | 17 | n.i. | Schizophrenia (clinical diagnosis)                                    |
| Harnryd 1989 <sup>65</sup>            | MEL 275 (200-300)<br>PBO                            | 10<br>10                       | 4  | 5.12 | Schizophrenia (RDC criteria)                                          |
| Hera 041-021 <sup>66</sup>            | ASE 10; 20<br>OLA 15<br>PBO                         | 106; 102<br>103<br>106         | 6  | n.i. | Schizophrenia (DSM-IV)                                                |
| Hera 041-022 <sup>67</sup>            | ASE 15 (10-20)<br>OLA (10-20)<br>PBO                | 91<br>93<br>93                 | 6  | n.i. | Schizophrenia in acute exacerbation (DSM-IV)                          |
| Herrera 1990 <sup>68</sup>            | THIOR 700 (400-1000)<br>PBO                         | 9<br>5                         | 4  | 9.62 | Acute schizophrenia (DSM-III)                                         |
| Hickerson 1956 <sup>69</sup>          | RES n.i. (2-8)<br>PBO<br>[ECT]                      | 24<br>26                       | 13 | n.i. | Acute schizophrenia (clinical diagnosis)                              |
| Hine 1958 <sup>70</sup>               | CPZ n.i. (-750)<br>PBO                              | 11<br>11                       | 20 | n.i. | Chronic schizophrenia (clinical diagnosis)                            |
| Hirayasu et al. 71 (Janssen CR012625) | OLA 10<br>PAL 6<br>PBO                              | 47<br>136<br>138               | 6  | n.i. | Schizophrenia (DSM-IV)                                                |
| Honigfeld et al. 1984a <sup>72</sup>  | CPZ 1183 (-1800)<br>[CLO 608 (-900)]<br>PBO         | 15<br>[16]<br>8                | 4  | n.i. | Acute exacerbation of schizophrenia (clinical diagnosis)              |
| Howard 1974 <sup>73</sup>             | HAL n.i. (600-8000)<br>THIOT n.i. (600-8000)<br>PBO | 17<br>16<br>16                 | 12 | 20.5 | Treatment resistant and chronic schizophrenia (clinical diagnosis)    |
| Jann et al. 1997 <sup>74</sup>        | HAL 29.0 (15-75)<br>PBO                             | 18<br>18                       | 6  | n.i. | Schizophrenia (DSM-III-R-criteria)                                    |
| Johnstone 1978 <sup>75</sup>          | FLUPE 8.4 (6-9)<br>PBO                              | 15<br>15                       | 4  | n.i. | Schizophrenia (PSE-criteria)                                          |
| Judd 1973 <sup>76</sup>               | THIOR 400<br>PBO                                    | 12<br>12                       | 3  | n.i. | Schizophrenia (newly hospitalised, clinical diagnosis)                |
| Kahn et al. 2007 <sup>77</sup>        | QUE IR400; XR400;<br>XR600; XR800<br>PBO            | 123; 113;<br>113; 121<br>118   | 6  | 8.3  | Acute schizophrenia (DSM-IV)                                          |
| Kane et al. 2002 <sup>78</sup>        | ARI 15; 30<br>HAL 10<br>PBO                         | 102; 102<br>104<br>106         | 4  | 16.3 | Schizophrenia or schizoaffective disorder with acute relapse (DSM-IV) |
| Kane et al. 2007b <sup>79</sup>       | OLA 10<br>PAL 6; 9; 12<br>PBO                       | 128<br>123; 122;<br>130<br>127 | 6  | 10.1 | Acute episode of schizophrenia (DSM-IV)                               |
| Kane et al. 2010a <sup>80</sup>       | ASE 10; 20<br>HAL 8<br>PBO                          | 114;106<br>115<br>123          | 6  | n.i. | Schizophrenia and acute exacerbation (DSM-IV-TR)                      |
| Kane et al. 2015 <sup>81</sup>        | BRE 1;2;4<br>PBO                                    | 120;186;<br>184<br>184         | 6  | 12.9 | Schizophrenia (DSM-IV-TR)                                             |



|                                       |                                                                                                                                                                                 |                                                  |    |      |                                                                             |
|---------------------------------------|---------------------------------------------------------------------------------------------------------------------------------------------------------------------------------|--------------------------------------------------|----|------|-----------------------------------------------------------------------------|
| Karn 1961 <sup>82</sup>               | CHLOR 300<br>PBO                                                                                                                                                                | 52<br>51                                         | 6  | n.i. | Chronic schizophrenia (clinical diagnosis)                                  |
| Keck et al. 1998 <sup>83</sup>        | ZIP 120 [40]<br>PBO                                                                                                                                                             | 47 [44]<br>48                                    | 4  | 16   | Acute exacerbation of schizophrenia or schizoaffective disorder (DSM-III-R) |
| King 1959 <sup>84</sup>               | CPZ 400<br>PROC 100<br>PBO                                                                                                                                                      | 24<br>24<br>24                                   | 10 | n.i. | Schizophrenia (clinical diagnosis)                                          |
| Kinon et al. 2011 <sup>85</sup>       | OLA 15<br>[LY2140023 (5; 20;<br>40; 80)]<br>PBO                                                                                                                                 | [121; 122;<br>120; 122]<br>62<br>122             | 4  | n.i. | Schizophrenia (DSM-IV)                                                      |
| Klein 1973 <sup>86</sup>              | CPZ 900 (300-1200)<br>PBO                                                                                                                                                       | 46<br>42                                         | 6  | n.i. | Schizophrenia (clinical diagnosis)                                          |
| Klieser 1989 <sup>87</sup>            | HAL 20<br>PBO<br>[Trazodone 400]<br>[Amitriptyline 150]                                                                                                                         | 22<br>16<br>17<br>20                             | 3  | n.i. | Acute schizophrenia DSM-III                                                 |
| Kurland et al. 1961 <sup>88</sup>     | CPZ 401.4 (300-1200.)<br>[Promazine 439 (300-1600) ]<br>[Mepazine 135.5 (75-450)]<br>TRIFLUPR 110.5 (75-300)<br>PROC 45.4 (30-125)<br>PERPH 8 (24-96)<br>[Phenobarbital]<br>PBO | 33<br>[32]<br>[34]<br>32<br>36<br>36<br>37<br>37 | 6  | n.i. | Predominantly schizophrenic patients (clinical diagnosis), newly admitted   |
| Lemmer 1993 <sup>89</sup>             | HAL n.i.<br>PBO                                                                                                                                                                 | n.i.                                             | 4  | n.i. | Acute schizophrenia (n.i.)                                                  |
| Levita 1961 <sup>90</sup>             | CPZ n.i. (50-400)<br>PBO                                                                                                                                                        | n.i.                                             | 13 | n.i. | Schizophrenia (clinical diagnosis)                                          |
| Lieberman et al. 2016 <sup>91</sup>   | RIS 4<br>[ITT 0074 60; 120]<br>PBO                                                                                                                                              | 82<br>84; 83<br>85                               | 4  | 16   | Schizophrenia (SCID-CT)                                                     |
| Lindenmayer et al. 2008 <sup>92</sup> | QUE 518 (SR 300, 600; 800; IR 300, 600)<br>PBO                                                                                                                                  | 448 (91; 92; 89; 90 ; 86)<br>84                  | 6  | 15.2 | Acute exacerbation of schizophrenia (DSM-IV)                                |
| Litman et al. 2016 <sup>93</sup>      | RIS 4<br>[AZD8529 40]<br>PBO                                                                                                                                                    | 31<br>[58]<br>58                                 | 4  | n.i. | Schizophrenia (DSM-IV)                                                      |
| Litmann 2014 <sup>94</sup>            | OLA 15<br>PBO<br>[(AZD2624) 40]                                                                                                                                                 | 22<br>41<br>43                                   | 4  | n.i. | Schizophrenia (DSM-IV)                                                      |
| Little 1958 <sup>95</sup>             | CPZ 150<br>PBO                                                                                                                                                                  | n.i.                                             | 3  | n.i. | Schizophrenia, paraphrenia (clinical diagnosis)                             |
| Loebel 2013 <sup>96</sup> (Study 233) | LURA 80; 160<br>PBO<br>QUE 600                                                                                                                                                  | 125; 121<br>122<br>120                           | 6  | 11.7 | Schizophrenia (DSM-IV)                                                      |
| Loebel et al. 2016 <sup>97</sup>      | LUR [20]; 96<br>PBO                                                                                                                                                             | [101]; 199<br>112                                | 6  | 14.2 | Schizophrenia (DSM-IV-TR)                                                   |
| Mahal 1976 <sup>98</sup>              | CPZ 250<br>PBO                                                                                                                                                                  | 27<br>27                                         | 9  | 0.5  | Schizophrenia (clinical diagnosis)                                          |

|                                                     |                                                                                                                                  |                                  |    |      |                                                 |
|-----------------------------------------------------|----------------------------------------------------------------------------------------------------------------------------------|----------------------------------|----|------|-------------------------------------------------|
| Marder et al. 1994 <sup>99</sup>                    | RIS 6<br>[2;10;16]<br>HAL 20<br>PBO                                                                                              | 64<br>[63;65;64]<br>66<br>66     | 8  | 16   | Chronic schizophrenia (DSM-III-R)               |
| Marder et al. 2007c <sup>100</sup>                  | OLA 10<br>PAL 6; 12<br>PBO                                                                                                       | 110<br>111; 111<br>110           | 6  | 16.4 | Acute episode of schizophrenia (DSM-IV)         |
| McDonald 1956 <sup>101</sup>                        | RES 3 (3-8)<br>PBO                                                                                                               | 13<br>14                         | 10 | n.i. | Chronic schizophrenia (clinical diagnosis)      |
| McEvoy et al. 2007b <sup>102</sup>                  | ARI 10; 15; 20<br>PBO                                                                                                            | 106; 106;<br>100<br>108          | 6  | n.i. | Schizophrenia with acute relapse (DSM-IV)       |
| McIness 1978 <sup>103</sup>                         | PIM n.i.<br>PBO                                                                                                                  | n.i.                             | 13 | n.i. | Chronic schizophrenia                           |
| Meltzer 2004 <sup>104</sup>                         | HAL 10<br>PBO<br>[5-HT <sub>2a/2c</sub> -Ant.]<br>[NK <sub>3</sub> -Ant.]<br>[CB <sub>1</sub> -Ant.]<br>[NTS <sub>1</sub> -Ant.] | 98<br>98<br>74<br>70<br>72<br>69 | 6  | n.i. | Acute schizophrenia (DSM-IV)                    |
| Meltzer et al. 2007a <sup>105</sup>                 | RIS 6<br>PBO<br>[Bifeprunox 30; 40]                                                                                              | 154<br>149<br>[140 ; 141]        | 6  | n.i. | Acute exacerbation of schizophrenia (DSM-IV-TR) |
| Meltzer et al. 2011 <sup>106</sup><br>(Study 231)   | LURA 40; 120<br>OLA 15<br>PBO                                                                                                    | 120; 119<br>123<br>116           | 6  | 13.4 | Schizophrenia (DSM-IV)                          |
| Montgomery 1992 <sup>107</sup>                      | THIOR 400<br>[Desenkephalin 10]<br>PBO                                                                                           | 32<br>31<br>33                   | 4  | n.i. | Acute exacerbation of schizophrenia (DSM-III)   |
| Nakamura et al. 2009 <sup>108</sup><br>(Study 196)  | LURA 80<br>PBO                                                                                                                   | 90<br>90                         | 6  | n.i. | Schizophrenia (DSM-IV)                          |
| Nasrallah 2013 <sup>109</sup><br>(Study 229)        | LUR 40; 80;120<br>PBO                                                                                                            | 125; 123;<br>124<br>128          | 6  | 14.2 | Schizophrenia (DSM-IV)                          |
| NCT00905307<br>Correll et al. 2016 <sup>110</sup>   | BRE [0.25];1±0.5;<br>2.5±0.5;5±0.5<br>ARI 15<br>PBO                                                                              | [42];89;90;<br>93<br>50<br>95    | 6  | n.i. | Schizophrenia (DSM-IV-TR)                       |
| NCT01098110<br>Kinoshita et al. 2016 <sup>111</sup> | ASE [5];10<br>PBO                                                                                                                | [176]<br>182<br>174              | 6  | n.i. | Schizophrenia (DSM-IV-TR)                       |
| NCT01104766<br>Durgam et al. 2015 <sup>112</sup>    | CAR 3;6<br>ARI 15<br>PBO                                                                                                         | 155;157<br>152<br>153            | 6  | 12.5 | Schizophrenia (DSM-IV-TR), acute exacerbation   |
| NCT01490086<br>Cantillon 2014 <sup>113</sup>        | ARI 15<br>[RP5063 15;30;50]<br>PBO                                                                                               | 20<br>[58;59;58]<br>39           | 6  | n.i. | Schizophrenia (DSM-IV-TR)                       |
| NCT016171 <sup>114</sup>                            | ASE [5];10<br>OLA 15<br>PBO                                                                                                      | [98];113<br>46<br>103            | 6  | n.i. | Schizophrenia (DSM-IV-TR)                       |
| Nistico 1974 <sup>115</sup>                         | PEN 40 (30-50)<br>PBO                                                                                                            | 10<br>10                         | 6  | n.i. | Chronic schizophrenia (clinical diagnosis)      |
| Ogasa et al. 2012 <sup>116</sup><br>(Study 006)     | LURA 40; 120<br>PBO                                                                                                              | 50; 49<br>50                     | 6  | n.i. | Schizophrenia (DSM-IV)                          |

|                                      |                                                                   |                         |      |      |                                                                                                                             |
|--------------------------------------|-------------------------------------------------------------------|-------------------------|------|------|-----------------------------------------------------------------------------------------------------------------------------|
| Paredes 1966 <sup>117</sup>          | CPZ n.i.<br>PBO                                                   | n.i.                    | 24   | n.i. | Schizophrenia (clinical diagnosis)                                                                                          |
| Pathiraja 1995 <sup>118</sup>        | HAL 12.5 (5-20)<br>RIS 9 (2-16)<br>PBO                            | n.i.                    | n.i. | n.i. | Schizophrenia (DSM-III-R)                                                                                                   |
| Patil et al. 2007 <sup>119</sup>     | OLA 15<br>PBO<br>[LY2140023]                                      | 34<br>63<br>[98]        | 4    | n.i. | Schizophrenia (DSM-IV-TR)                                                                                                   |
| Payne 1960 <sup>120</sup>            | CPZ 237.5 (75-300)<br>TRIFLUPR 237.5 (75-300)<br>PBO              | 7<br>7<br>7             | 6    | n.i. | Chronic schizophrenia (clinical diagnosis)                                                                                  |
| Peet 1981 <sup>121</sup>             | CPZ 225 (50-400)<br>PBO<br>[Propranolol (40-640)]                 | 16<br>18<br>19          | 4    | 24   | Chronic schizophrenia (Feighner criteria)                                                                                   |
| Pfizer 2008 <sup>122</sup>           | ARI 15<br>[pf-00217830 (2;15)]<br>PBO                             | n.i.                    | 3    | n.i. | Acute exacerbation of schizophrenia (DSM-IV)                                                                                |
| Pi 1990 <sup>123</sup>               | THIO 500 (200-800)<br>PBO<br>[HAL (0.3 mg/kg)<br>open conditions] | 7<br>5<br>5             | 4    | 8.41 | Acute exacerbation of chronic schizophrenia (DSM-III)                                                                       |
| Potkin 2001 <sup>124</sup>           | HAL 10<br>[M100907 (10; 20)]<br>PBO                               | 56<br>[124; 123]<br>110 | 6    | n.i. | Schizophrenia or schizoaffective disorder (DSM-IV)                                                                          |
| Potkin et al. 2003 <sup>125</sup>    | ARI 20; 30<br>PBO<br>RIS 6                                        | 101; 101<br>103<br>99   | 4    | n.i. | Schizophrenia or schizoaffective disorder with acute relapse (DSM-IV)                                                       |
| Potkin et al. 2007c <sup>126</sup>   | ASE 10<br>RIS 6<br>PBO                                            | 60<br>60<br>62          | 6    | n.i. | Acute schizophrenia (DSM-IV)                                                                                                |
| Prien and Cole 1968a <sup>127</sup>  | CPZ 300 [2000]<br>PBO                                             | 208 [210]<br>212        | 8    | 17.4 | Chronic schizophrenia (clinical diagnosis)                                                                                  |
| Ramu 1999 <sup>128</sup>             | CPZ 250 (-300)<br>PBO<br>[Tagara (Ayurveda)<br>Brahmadiyoga]      | 27<br>27<br>27<br>27    | 8    | n.i. | Acute schizophrenia (clinical diagnosis)                                                                                    |
| Ramu 1999a <sup>129</sup>            | CPZ 375 (-450)<br>PBO<br>[Brahmadiyoga]                           | 22<br>20<br>15          | 8    | 4.65 | Chronic schizophrenia (clinical diagnosis)                                                                                  |
| Rappaport et al. 1978 <sup>130</sup> | CPZ n.i. (300-900)<br>PBO                                         | 39<br>41                | 6    | n.i. | Acute schizophrenia (clinical diagnosis)                                                                                    |
| Sakalis 1977 <sup>131</sup>          | CPZ 1000<br>PBO                                                   | 33<br>17                | 4    | n.i. | Acute schizophrenia(RDC criteria)                                                                                           |
| Sandison 1960 <sup>132</sup>         | THIOR 300<br>PBO                                                  | 8<br>7                  | 12   | 5.5  | Schizophrenia (relapsing, clinical diagnosis)                                                                               |
| Saretsky 1966 <sup>133</sup>         | CPZ 100<br>PBO                                                    | 20<br>20                | 13   | n.i. | Schizophrenic reaction (clinical diagnosis)                                                                                 |
| Scanlan 1963 <sup>134</sup>          | CHLOR 300<br>PBO                                                  | n.i.                    | 12   | n.i. | Chronic schizophrenia (clinical diagnosis)                                                                                  |
| Schmidt 2012 <sup>135</sup>          | OLA 15<br>PBO                                                     | 93<br>101               | 12   | 10.8 | Acute schizophrenia (DSM-IV)                                                                                                |
| Selman et al. 1976 <sup>136</sup>    | HAL 8.8 (4-12)<br>PBO<br>LOX 110 (50-150)                         | 29<br>29<br>29          | 12   | n.i. | Acute schizophrenia, acute exacerbation of chronic schizophrenia (clinical diagnosis made independently by 2 psychiatrists) |

|                                                   |                                                                      |                                 |    |          |                                                                                      |
|---------------------------------------------------|----------------------------------------------------------------------|---------------------------------|----|----------|--------------------------------------------------------------------------------------|
| Serafetinides et al. 1972 <sup>137</sup>          | CPZ 830 (-1000)<br>HAL 12.3 (-15)<br>PBO<br>Clopenthixol 205(50-250) | 14<br>14<br>14<br>15            | 12 | 14.7     | Chronic schizophrenia (clinical diagnosis)                                           |
| Shen 2014 <sup>138</sup>                          | OLA 15<br>PBO                                                        | 77<br>78                        | 6  | n.i.     | Acute schizophrenia (DSM-IV-TR)                                                      |
| Shepherd 1956 <sup>139</sup>                      | CPZ 300<br>PBO                                                       | 8<br>16                         | 6  | n.i.     | Severe schizophrenia (clinical diagnosis)                                            |
| Simpson 1974 <sup>140</sup>                       | HAL (6;30)<br>PBO                                                    | 16<br>8                         | 14 | 12       | Chronic schizophrenia (clinical diagnosis)                                           |
| Sittampalan 1962 <sup>141</sup>                   | PROC 150<br>PBO                                                      | 9<br>9                          | 12 | n.i.     | Chronic schizophrenia (clinical diagnosis)                                           |
| Small et al. 1997 <sup>142</sup>                  | QUE 360 (250-750)<br>[<250]<br>PBO                                   | 96<br>[94]<br>96                | 6  | 15       | Acute exacerbation of (sub-) chronic schizophrenia (DSM-III-R)                       |
| Somerville 1960 <sup>143</sup>                    | CPZ 472 (200-800)<br>THIOR 472 (200-800)<br>PBO                      | 15<br>15<br>30                  | 6  | 9.32     | Schizophrenia or Paraphrenia (clinical diagnosis)                                    |
| Spohn et al. 1977 <sup>144</sup>                  | CPZ n.i. ( $\geq 200$ )<br>PBO                                       | 20<br>20                        | 8  | $\geq 2$ | Chronic schizophrenia (clinical diagnosis)                                           |
| Study 049 <sup>145</sup>                          | LURA 40; 80<br>[20]<br>HAL 10<br>PBO                                 | 69; 71<br>[71]<br>73<br>72      | 6  | n.i.     | Schizophrenia (DSM-IV)                                                               |
| Study 115 2000 <sup>146</sup>                     | ZIP 120; 200<br>[40]<br>HAL 15<br>PBO                                | 78; 86<br>[87]<br>85<br>83      | 6  | n.i.     | Acute exacerbation of schizophrenia or schizoaffective disorder (DSM-III-R)          |
| Study 3000 <sup>147</sup> (Potkin 2008a)          | ILO 12 [4; 8]<br>HAL 15<br>PBO                                       | 124<br>[121; 125]<br>124<br>127 | 6  | 15.6     | Acute or subacute exacerbation of schizophrenia or schizoaffective disorder (DSM-IV) |
| Study 3004 <sup>147</sup> (Potkin 2008b)          | ILO (10-16) [4-8]<br>RIS 7.0 (4-8)<br>PBO                            | 154 [153]<br>153<br>156         | 6  | n.i.     | Acute or subacute exacerbation of schizophrenia or schizoaffective disorder (DSM-IV) |
| Study 3005 <sup>147</sup> (Potkin 2008c)          | ILO 12-16; 20-24<br>RIS 7.1 (6-8)<br>PBO                             | 244; 145<br>157<br>160          | 6  | n.i.     | Acute or subacute exacerbation of schizophrenia or schizoaffective disorder (DSM-IV) |
| Study 93202 <sup>148</sup>                        | ARI 30 (5-30)<br>HAL 20 (5-20)<br>PBO                                | 34<br>34<br>35                  | 4  | n.i.     | Schizophrenia with acute relapse (DSM-III-R)                                         |
| Study 94202 <sup>149</sup>                        | ARI 10; 30<br>[2]<br>HAL 10<br>PBO                                   | 61; 60<br>[59]<br>63<br>64      | 4  | n.i.     | Schizophrenia with acute relapse (DSM-IV)                                            |
| Study RGH-MD-03 Durgam et al. 2016 <sup>150</sup> | CAR 1.5-4.5; [6-12]<br>PBO                                           | 128; [134]<br>130               | 6  | 17.5     | Schizophrenia (DSM-IV-TR)                                                            |
| Study RGH-MD-05 Kane et al. 2015 <sup>151</sup>   | CAR 3-6; [6-9]<br>PBO                                                | 151[148]<br>147                 | 6  | 11.5     | Schizophrenia (DSM-IV-TR)                                                            |

|                                       |                                                    |                                    |    |      |                                                                                            |
|---------------------------------------|----------------------------------------------------|------------------------------------|----|------|--------------------------------------------------------------------------------------------|
| Study RIS-USA-72 1996 <sup>152</sup>  | RIS 4; 8<br>PBO                                    | 85; 78<br>83                       | 4  | n.i. | Chronic or subchronic schizophrenia (DSM-III-R)                                            |
| Swanson 2005 <sup>153</sup>           | OLA 15<br>[SB-773812 60]<br>PBO                    | n.i.                               | 12 | n.i. | Acute schizophrenia (n.i.)                                                                 |
| Tetreault 1969 <sup>154</sup>         | FLUPH 22 (10-30)<br>PBO                            | 11<br>11                           | 12 | n.i. | Chronic schizophrenia (clinical diagnosis)                                                 |
| Tetreault et al. 1969a <sup>155</sup> | CPZ 539 (fixed titration schedule)<br>PBO [TPS-23] | 15<br>15<br>[15]                   | 12 | n.i. | Chronic schizophrenia (clinical diagnosis)                                                 |
| Tzimos et al. 2008 <sup>156</sup>     | PAL 8.4 (3-12)<br>PBO                              | 76<br>38                           | 6  | 34.3 | Acute episode of schizophrenia (DSM-IV)                                                    |
| Van der Felde 1975 <sup>157</sup>     | LOX 103 (100-150)<br>THIOT 50 (40-60)<br>PBO       | 26<br>28<br>28                     | 6  |      | Acute exacerbation of schizophrenia (clinical diagnosis)                                   |
| Van Kammen 1996 <sup>158</sup>        | SER 12; 20<br>[8]<br>PBO                           | 51; 54<br>[52]<br>48               | 6  | 14   | Schizophrenia, history of a previous response to antipsychotic drugs (DSM-III-R)           |
| Vichaiya 1971 <sup>159</sup>          | HAL 4.5 (n.i.)<br>PBO                              | 15<br>15                           | 6  | n.i. | Chronic schizophrenia (clinical diagnosis)                                                 |
| Walsh 1959 <sup>160</sup>             | CPZ 255 (-300)<br>TRIFLUPR (-300)<br>PBO           | 22<br>22<br>22                     | 8  | n.i. | Chronic schizophrenia (clinical diagnosis)                                                 |
| Wolpert 1968 <sup>161</sup>           | THIOT 10 (-60)<br>THIOR 200 (-1200)<br>PBO         | 35<br>29<br>28                     | 31 | n.i. | Chronic schizophrenia (clinical diagnosis)                                                 |
| Wyeth 2005 <sup>162</sup>             | OLA 15<br>[SCA-136 (200;400) ]<br>PBO              | n.i.                               | 6  | n.i. | Schizophrenia (n.i.)                                                                       |
| Zborowski et al. 1995 <sup>163</sup>  | SER 20<br>[SER 24]<br>HAL 16<br>PBO                | 117 [113]<br>115<br>116            | 8  | 15   | Schizophrenia (DSM-III-R or DSM-IV)                                                        |
| Zimbroff et al. 1997 <sup>164</sup>   | SER 12; 20<br>[SER 24]<br>HAL 4; 8; 16<br>PBO      | 76; 68<br>[72]<br>71; 67; 70<br>73 | 8  | 16   | Schizophrenia, history of a previous response to antipsychotic drugs (DSM-III-R or DSM-IV) |

n= number of patients, AMI = Amisulpride, ARI = Aripiprazole, ASE = Asenapine, BLO = Blonanserin, BRE = Brexpiprazol, BUTA = Butaperazine, CAR = Cariprazine, CARP = Carphenazine, CLO = Clozapine, CLOP = Clopenthixol, CPZ = Chlorpromazine, FLUPH = Fluphenazine, HAL = Haloperidol, ILO = Iloperidone, LEV= Levomepromazine, LOX = Loxapine, LUR = Lurasidone, MEL = Melperone, MOL = Molindone, OLA = Olanzapine, PAL = Paliperidone, PERPH = Perphenazine, PIP = pipothiazine, PROC = Prochlorpromazine, QUE = Quetiapine, RES = Reserpine, RIS = Risperidone, SER = Sertindole, TIOS = Tiospirone, THIOR = thioridazine, THIOT = Thiothixene, TRIFLU = Trifluperazine, TRIFLUP = Trifluperidol, TRIFLUPR=Triflupromazine, ZIP = Ziprasidone, ZOT=Zotepine, PBO= Placebo, ICD 9/10 = International Classification of Diseases, 9th/10th Revision, DSM-III, -III-R, -IV = different versions of the Diagnostic and Statistical Manual of Mental Disorders, n.i. = not indicated, IR= immediate release, XR= extended release

[drug groups or numbers in squared brackets were not used in any analysis, neither the primary one nor in a sensitivity analysis]

## References:

*The number of references is lower than the number of included studies, because some publications reported on two or more studies*

1. Adelson D, Epstein LJ. A study of phenothiazines with male and female chronically ill schizophrenic patients. *J Nerv Ment Dis* 1962; **134**: 543-54.
2. Ahmed S, Casey D, Yeung P, Barbato L, Heisterberg J, Shapira NA. Lipid profile among patients with schizophrenia randomized to bifeprunox, placebo, or olanzapine: a comparison of results. *11th International Congress on Schizophrenia Research; 2007 Mar 28-Apr 1, Colorado Springs, Colorado, USA* 2007.
3. Arvanitis LA, Miller BG, group Sts. Multiple fixed doses of "Seroquel" (quetiapine) in patients with acute exacerbation of schizophrenia: a comparison with haloperidol and placebo. *Biol Psychiatry* 1997; **42**: 233-46.
4. Augustin BG, Jann MW, Crabtree BL, Pitts WM, Carter JG. Plasma alpha-one acid glycoprotein (AAG) and haloperidol (H) concentrations in schizophrenic patients. 20th Collegium Internationale Neuro-Psychopharmacologicum Congress; 1996 Jun 23-27; Melbourne, Australia; 1996.
5. Baker JP. A controlled trial of ethylcrotonylurea. *Journal of Mental Science*; 1959. p. 852-62.
6. Ban TA, Lehmann HE, Sterlin C, Climan M. Comprehensive clinical studies with thiothixene. *Dis Nerv Syst* 1975; **36**(9): 473-7.
7. Barbato L, Newcomer J, Heisterberg J, Yeung P, Shapira N. Efficacy and metabolic profile of bifeprunox in patients with schizophrenia. *11th International Congress on Schizophrenia Research; 2007 Mar 28-Apr 1, Colorado Springs, Colorado, USA* 2007.
8. Barron A, Rudy LH, Smith JA. Comparison of a psychoactive drug and an anabolic steroid in chronically ill mental patients. *American Journal of Psychiatry*; 1963. p. 1172-3.
9. Beasley CM, Sanger T, Satterlee W. Olanzapine versus placebo: results of a double-blind fixed dose olanzapine trial. *Psychopharmacology* 1996; **124**: 159-67.
10. Beasley CM, Tollefson GD, Tran P, et al. Olanzapine versus haloperidol and placebo. Acute phase results of the american double-blind olanzapine trial. *Neuropsychopharmacology* 1996; **14**: 111-23.
11. Bechelli LP, Ruffino-Netto A, Hetem G. A double-blind controlled trial of pipotiazine, haloperidol and placebo in recently-hospitalized acute schizophrenic patients. *Braz J Med Biol Res* 1983; **16**(4): 305-11.
12. Bishop MP, Gallant DM, Nesselhof W, Sprehe DJ. A controlled evaluation of butaperazine in chronic schizophrenic patients. *Diseases of the Nervous System*; 1964. p. 674-83.
13. Bishop MP, Gallant DM. Behavioral toxicity associated with benzquinamide (quantril) therapy in schizophrenic patients. *Am J Psychiatry* 1963; **120**: 180-1.
14. Borison RL, Sinha D, Haverstock S, McLarnon MC, Diamond BI. Efficacy and safety of tiospirone vs. haloperidol and thioridazine in a double-blind, placebo-controlled trial. *Psychopharmacol Bull* 1989; **25**(2): 190-3.
15. Borison RL, Diamond BI, Dren AT. Does sigma receptor antagonism predict clinical antipsychotic efficacy? *Psychopharmacology Bulletin* 1991; **27**(2): 103-6.
16. Borison RL, Pathiraja AP, Diamond BI, Meibach RC. Risperidone - Clinical Safety and Efficacy in Schizophrenia. *Psychopharmacol Bull* 1992; **28**(2): 213-8.

17. Borison RL, Arvanitis LA, Miller BG. ICI 204,636 an atypical antipsychotic efficacy and safety in a multicenter placebo-controlled trial in patients with schizophrenia. *JClinPsychopharmacol* 1996; **16**(2): 158-69.
18. Bugarski-Kirola D, Wang A, Abi-Saab D, Blattler T. A phase II/III trial of bitopertin monotherapy compared with placebo in patients with an acute exacerbation of schizophrenia - results from the CandleLyte study. *European neuropsychopharmacology : the journal of the European College of Neuropsychopharmacology* 2014; **24**(7): 1024-36.
19. Canuso CM, Lindenmayer JP, Kosik-Gonzalez C, et al. A randomized, double-blind, placebo-controlled study of 2 dose ranges of paliperidone extended-release in the treatment of subjects with schizoaffective disorder. *JClinPsychiatry* 2010; **71**(5): 587-98.
20. Canuso CM, Schooler N, Carothers J, et al. Paliperidone extended-release in schizoaffective disorder: a randomized, controlled study comparing a flexible dose with placebo in patients treated with and without antidepressants and/or mood stabilizers. *J Clin Psychopharmacol* 2010; **30**(5): 487-95.
21. Casey JF, F. BI, J. LC, E. HL, H. GM, N. SN. Drug therapy in schizophrenia. A controlled study of the relative effectiveness of chlorpromazine, promazine, phenobarbital, and placebo. *Archives of General Psychiatry*; 1960. p. 210-20.
22. Casey DE, Sands EE, Heisterberg J, Yang HM. Efficacy and safety of bifeprunox in patients with an acute exacerbation of schizophrenia: results from a randomized, double-blind, placebo-controlled, multicenter, dose-finding study. *Psychopharmacology (Berl)* 2008; **200**(3): 317-31.
23. Charalampous KD, Freemesser GF, Malev J, Ford K. Loxapine succinate: a controlled double blind study in schizophrenia. *Current Therapeutic Research*; 1974. p. 829-37.
24. Chouinard G, Annable L, Serrano M, Albert JM, Charette R. Amitriptyline-perphenazine interaction in ambulatory schizophrenic patients. A controlled study of drug interaction. *Archives of General Psychiatry*; 1975. p. 1295-307.
25. Chouinard G. A placebo-controlled clinical trial of remoxipride and chlorpromazine in newly admitted schizophrenic patients with acute exacerbation. *Acta PsychiatrScandSuppl* 1990; **358**: 111-9.
26. Chouinard G, Jones B, Remington G. Canadian placebo-controlled study of fixed doses of risperidone and haloperidol in the treatment of chronic schizophrenic patients. *JClinPsychopharmacol* 1993; **13**: 25-40.
27. Clark ML, K. HW, Kyriakopoulos AA, Ray TS, Colmore JP, Ramsey HR. Evaluation of trifluoperidol in chronic schizophrenia. *Psychopharmacology*; 1968. p. 193-203.
28. Clark ML, Ray TS, Huber WK, Willis D, Ramsey HR. Evaluation of butaperazine in chronic schizophrenia. *Clinical Pharmacology and Therapeutics*; 1968. p. 757-64.
29. Clark ML. Haloperidol versus chlorpromazine. *PsychopharmacolBull* 1969; **5**(3): 57-9.
30. Clark ML, Paredes A, Costiloe JP, Wood F, Barrett A. Loxapine in newly admitted chronic schizophrenic patients. *Journal of Clinical Pharmacology*; 1975. p. 286-94.
31. Clark ML, Paredes A, Costiloe JP, Fulkerson FG, Wood F. Evaluation of two dose levels of loxapine succinate in chronic schizophrenia. *Diseases of the Nervous System*; 1977. p. 7-10.
32. Clark ML, Huber WK, Sakata K, Fowles DC, Serafetinides EA. Molindone in chronic schizophrenia. *ClinPharmacolTher* 1970; **11**(5): 680-8.
33. Clark ML, Ramsey HR, Ragland RE, Rahhal DK, Serafetinides EA, Costiloe JP. Chlorpromazine in chronic schizophrenia: behavioral dose-response relationships. *Psychopharmacologia* 1970; **18**(3): 260-70.

34. Clark ML, Huber WK, Charalampous KD, Serafetinides EA, Trousdale W, Colmore JP. Drug treatment in newly admitted schizophrenic patients. *ArchGenPsychiatry* 1971; **25**(5): 404-9.
35. Clark ML, Huber WK, Sullivan J, Wood F, Costiloe JP. Evaluation of loxapine succinate in chronic schizophrenia. *DisNervSyst* 1972; **33**(12): 783-91.
36. Clark ML, Paredes A, Costiloe JP, Wood F. Evaluation of butaclamol in chronic schizophrenic patients. *JClinPharmacol* 1977; **17**(8-9): 529-36.
37. Cockburn AS, Miller GD. A note on a controlled experiment using reserpine, an extract of alstonia constricta and placebo. *Medical Journal of Australia*; 1959. p. 662-4.
38. Cole JO, Goldberg SC, Klerman GL. Phenothiazine treatment in acute schizophrenia. *Archives of general psychiatry*; 1964. p. 246-61.
39. Cooper SJ, Tweed J, Raniwalla J, Butler A, Welch C. A placebo controlled comparison of zotepine versus chlorpromazine in patients with acute exacerbation of schizophrenia. *Acta PsychiatrScand* 2000; **101**: 218-25.
40. Cooper SJ, Butler A, Tweed J, Welch C, Raniwalla J. Zotepine in the prevention of recurrence: a randomised, double-blind, placebo-controlled study for chronic schizophrenia. *Psychopharmacology* 2000; **150**(3): 237-43.
41. Coppola D, Melkote R, Lannie C, et al. Efficacy and safety of paliperidone extended release 1.5 mg/day - a double-blind, placebo- and active-controlled, study in the treatment of patients with schizophrenia. *PsychopharmacolBull* 2011; **44**: 1-19.
42. Correll CU, Skuban A, Ouyang J, et al. Efficacy and Safety of Brexpiprazole for the Treatment of Acute Schizophrenia: A 6-Week Randomized, Double-Blind, Placebo-Controlled Trial. *The American journal of psychiatry* 2015; **172**(9): 870-80.
43. Corrigan MH, Gallen CC, Bonura ML, Merchant KM. Effectiveness of the selective D-4 antagonist sonepiprazole in schizophrenia: A placebo-controlled trial. *BiolPsychiatry* 2004; **55**(5): 445-51.
44. Cutler AJ, Marcus RN, Hardy SA, O'Donnell A, Carson WH, McQuade RD. The efficacy and safety of lower doses of aripiprazole for the treatment of patients with acute exacerbation of schizophrenia. *CNSSpectr* 2006; **11**(9): 691-702.
45. Cutler AJ, Kalali AH, Weiden PJ, Hamilton J, Wolfgang CD. Four-week, double-blind, placebo- and ziprasidone-controlled trial of iloperidone in patients with acute exacerbations of schizophrenia. *JClinPsychopharmacol* 2008; **28**(2 Suppl 1): S20-S8.
46. Cutler AJ, Tran-Johnson T, Kalali A, Astrom M, Brecher M, Meulien D. A failed 6-week, randomized, double-blind, placebo-controlled study of once-daily extended release quetiapine fumarate in patients with acute schizophrenia: lessons learned. *Psychopharmacol Bull* 2010; **43**(4): 37-69.
47. Daniel DG, Zimbroff DL, Potkin SG, Reeves KR, Harrigan EP, Lakshminarayanan M. Ziprasidone 80 mg/day and 160 mg/day in the acute exacerbation of schizophrenia and schizoaffective disorder: A 6-week placebo-controlled trial. *Neuropsychopharmacology* 1999; **20**(5): 491-505.
48. Davidson M, Emsley R, Kramer M, et al. Efficacy, safety and early response of paliperidone extended-release tablets (paliperidone ER): results of a 6-week, randomized, placebo-controlled study. *SchizophrRes* 2007; **93**(1-3): 117-30.
49. Downing AM, Kinon BJ, Millen BA, et al. A double-blind, placebo-controlled comparator study of LY2140023 monohydrate in patients with schizophrenia. *BMC psychiatry* 2014; **14**: 351.



50. Durgam S, Starace A, Li D, et al. An evaluation of the safety and efficacy of cariprazine in patients with acute exacerbation of schizophrenia: a phase II, randomized clinical trial. *Schizophr Res* 2014; **152**(2-3): 450-7.
51. Egan MF, Zhao X, Smith A, et al. Randomized controlled study of the T-type calcium channel antagonist MK-8998 for the treatment of acute psychosis in patients with schizophrenia. *Hum Psychopharmacol* 2013; **28**(2): 124-33.
52. Engelhardt DM, Margolis RA, Rudorfer L, Paley HM. Physician bias and the double-blind. *Archives of general psychiatry*; 1969. p. 315-20.
53. Evans JR, Rodnick EH, Goldstein MJ, Judd LL. Premorbid adjustment, phenothiazine treatment, and remission in acute schizophrenics. *Archives of General Psychiatry*; 1972. p. 486-90.
54. Fabre LF, Arvanitis L, Pultz J, Jones VM, Malick JB, Slotnick VB. ICI 204,636, a Novel, atypical antipsychotic - early indication of safety and efficacy in patients with chronic and subchronic schizophrenia. *Clinical therapeutics*; 1995. p. 366-78.
55. Finkle LP, Johnson CC. Psychiatric and Behavioral Effects of Chlorprothixene Concentrate Suspension in Chronic Hospitalized Schizophrenics. *Dis Nerv Syst* 1965; **26**: 225-8.
56. Fleming BG, Spencer AM, Whitelaw EM. A controlled comparative investigation of the effects of promazine, chlorpromazine, and a placebo in chronic psychosis. *J Ment Sci* 1959; **105**(439): 349-58.
57. Gallant DM, Bishop MP, Steele CA, D. NC. The relationship between serotonin antagonism and tranquilizing activity. *American Journal of Psychiatry*; 1963. p. 882.
58. Garcia E, Robert M, Peris F, Nakamura H, Sato N, Terazawa Y. The efficacy and safety of blonanserin compared with haloperidol in acute-phase schizophrenia: a randomized, double-blind, placebo-controlled, multicentre study. *CNS Drugs* 2009; **23**(7): 615-25.
59. Garry JW, Leonard TJ. Haloperidol: a controlled trial in chronic schizophrenia. *J Ment Sci* 1962; **108**: 105-7.
60. Geffen YK, Rabinowitz J, Anand R, Davidson M. BL-1020, a new  $\gamma$ -aminobutyric acid-enhanced antipsychotic: results of 6-week, randomized, double-blind, controlled, efficacy and safety study. *J Clin Psychiatry* 2012; **73**: 1168-74.
61. Goldberg SC, Frosch WA, Drossman A. K., R. SN, F. JG. Prediction of response to phenothiazines in schizophrenia. A crossvalidation study. *Archives of General Psychiatry*; 1972. p. 367-73.
62. Hall RA, Dunlap DJ. A study of chlorpromazine: methodology and results with chronic semi-disturbed schizophrenics. *J Nerv Ment Dis* 1955; **122**(4): 301-14.
63. Hamilton M, Smith ALG, Lapidus HR, Cadogan EP. A controlled trial of thiopropazate dihydrochloride (dartalan), chlorpromazine and occupational therapy in chronic schizophrenics. *Journal of Mental Science*; 1960. p. 40-55.
64. Hamilton M, Hordern A, Waldrop FN, Lofft J. A controlled trial on the value of prochlorperazine, trifluoperazine and intensive group treatment. *British Journal of Psychiatry*; 1963. p. 510-22.
65. Harnryd C, Bjerkenstedt L, Gullberg B. A clinical comparison of melperone and placebo in schizophrenic women on a milieu therapeutic ward. *Acta Psychiatrica Scandinavica Supplementum*; 1989. p. 40-7.
66. 041-021 SH. A multicenter, randomized, double-blind, fixed-dose, 6-week trial of the efficacy and safety of asenapine compared with placebo using olanzapine positive control in subjects with an acute exacerbation of schizophrenia. *Center for drug evaluation and research Application number 22-117 Medical review(s)* <http://www.fda.gov> 2009.

67. 041-022 SH. A multicenter, randomized, double-blind, flexible-dose, 6-week trial of the efficacy and safety of asenapine compared with placebo using olanzapine positive control in subjects with an acute exacerbation of schizophrenia. *Center for drug evaluation and research Application number 22-117 Medical review(s)* <http://www.fda.gov> 2009.
68. Herrera J, Costa J, Sramek J, Heh C. The efficacy of sustained release thioridazine in the treatment of schizophrenic inpatients. *Current Therapeutic Research*; 1990. p. 1006-11.
69. Hickerson GXJ, M. SJ, Tempey FW. Reserpine in acute psychotic states. *Journal of Nervous and Mental Disease*; 1956. p. 614-7.
70. Hine FR. Chlorpromazine in schizophrenic withdrawal and in the withdrawn schizophrenic. *Journal of Nervous and Mental Disease*; 1958. p. 220-7.
71. Hirayasu Y, Tomioka M, Iizumi M, Kikuchi H. A double-blind, placebo-controlled, comparative study of paliperidone extended release (ER) tablets in patients with schizophrenia. *Jpn J Clin Psychopharmacol* 2010; **13**: 2077-103.
72. Honigfeld G. Clozapine: antipsychotic activity in treatment-resistant schizophrenics. *Adv Ther* 1984; **1**: 77-97.
73. Howard JS. Haloperidol for chronically hospitalized psychotics: a double blind comparison with thiothixene and placebo: a follow up open evaluation. *Diseases of the Nervous System*; 1974. p. 458-63.
74. Jann MW, Crabtree BL, Pitts WM, Lam YW, Carter JG. Plasma alpha-one acid glycoprotein and haloperidol concentrations in schizophrenic patients. *Neuropsychobiology* 1997; **36**(1): 32-6.
75. Johnstone EC, Crow TJ, Frith CD, Carney MW, Price JS. Mechanism of the antipsychotic effect in the treatment of acute schizophrenia. *Lancet*; 1978. p. 848-51.
76. Judd LL, Goldstein MJ, Rodnick EH, Jackson NL. Phenothiazine effects in good premorbid schizophrenics divided into paranoid-nonparanoid status. *Archives of General Psychiatry*; 1973. p. 207-21.
77. Kahn RS, Schulz SC, Palazov VD, et al. Efficacy and tolerability of once-daily extended release quetiapine fumarate in acute schizophrenia: a randomized, double-blind, placebo-controlled study. *J Clin Psychiatry* 2007; **68**(6): 832-42.
78. Kane JM, Carson WH, Saha AR, et al. Efficacy and safety of aripiprazole and haloperidol versus placebo in patients with schizophrenia and schizoaffective disorder. *J Clin Psychiatry* 2002; **63**(9): 763-71.
79. Kane J, Canas F, Kramer M, et al. Treatment of schizophrenia with paliperidone extended-release tablets: a 6-week placebo-controlled trial. *Schizophr Res* 2007; **90**(1-3): 147-61.
80. Kane JM, Cohen M, Zhao J, Alphs L, Panagides J. Efficacy and safety of asenapine in a placebo- and haloperidol-controlled trial in patients with acute exacerbation of schizophrenia. *J Clin Psychopharmacol* 2010; **30**(2): 106-15.
81. Kane JM, Skuban A, Ouyang J, et al. A multicenter, randomized, double-blind, controlled phase 3 trial of fixed-dose brexpiprazole for the treatment of adults with acute schizophrenia. *Schizophrenia research* 2015; **164**(1-3): 127-35.
82. Karn WN, Jr., Mead BT, Fishman JJ. Double-blind study of chlorprothixene (Taractan) a panpsychotropic agent. *The Journal of obstetrics and gynaecology of the British Empire* 1961; **1**: 72-9.
83. Keck P, Buffenstein A, Ferguson J, et al. Ziprasidone 40 and 120 mg/day in the acute exacerbation of schizophrenia and schizoaffective disorder: a 4-week placebo controlled trial. *Psychopharmacology* 1998; **140**(2): 173-84.

84. King PD, Weinberger W. Comparison of prochlorperazine and chlorpromazine in hospitalized chronic schizophrenics. *Am J Psychiatry* 1959; **115**(11): 1026-7.
85. Kinon BJ, Zhang L, Millen BA, et al. A multicenter, inpatient, phase 2, double-blind, placebo-controlled dose-ranging study of LY2140023 monohydrate in patients with DSM-IV schizophrenia. *J Clin Psychopharmacol* 2011; **31**(3): 349-55.
86. Klein DF, Rosen B. Premorbid asocial adjustment and response to phenothiazine treatment among schizophrenic inpatients. *Archives of General Psychiatry*; 1973. p. 480-5.
87. Klieser E, Lehmann E. Experimental examination of trazodone. *Clinical Neuropharmacology*; 1989. p. S18-24.
88. Kurland AA, Hanlon TE, Tatom MH, Ota KY, Simopoulos AM. The comparative effectiveness of six phenothiazine compounds, phenobarbital and inert placebo in the treatment of acutely ill patients: global measures of severity of illness. *J Nerv Ment Dis* 1961; **133**: 1-18.
89. Lemmer W, Klieser E, Klimke A. Experimental comparison of the efficacy of the dopamine autoreceptor agonist pramipexole versus haloperidol and placebo in acute schizophrenics. *Pharmacopsychiatry*; 1993. p. 176.
90. Levita E. Effects of chlorpromazine and promazine on perseveration. *Journal of General Psychology*; 1961. p. 181-7.
91. Lieberman JA, Davis RE, Correll CU, et al. ITI-007 for the Treatment of Schizophrenia: A 4-Week Randomized, Double-Blind, Controlled Trial. *Biological psychiatry* 2016; **79**(12): 952-61.
92. Lindenmayer JP, Brown D, Liu S, Brecher M, Meulien D. The efficacy and tolerability of once-daily extended release quetiapine fumarate in hospitalized patients with acute schizophrenia: a 6-week randomized, double-blind, placebo-controlled study. *Psychopharmacol Bull* 2008; **41**(3): 11-35.
93. Litman RE, Smith MA, Doherty JJ, et al. AZD8529, a positive allosteric modulator at the mGluR2 receptor, does not improve symptoms in schizophrenia: A proof of principle study. *Schizophrenia research* 2016; **172**(1-3): 152-7.
94. Litman RE, Smith MA, Desai DG, Simpson T, Sweitzer D, Kanen SJ. The selective neurokinin 3 antagonist AZD2624 does not improve symptoms or cognition in schizophrenia: a proof-of-principle study. *J Clin Psychopharmacol* 2014; **34**(2): 199-204.
95. Little JC. A double-blind controlled comparison of the effects of chlorpromazine, barbiturate and a placebo in 142 chronic psychotic in-patients. *Journal of Mental Science*; 1958. p. 334-49.
96. Loebel A, Cucchiaro J, Sarma K, et al. Efficacy and safety of lurasidone 80 mg/day and 160 mg/day in the treatment of schizophrenia: a randomized, double-blind, placebo- and active-controlled trial. *Schizophr Res* 2013; **145**(1-3): 101-9.
97. Loebel A, Silva R, Goldman R, et al. Lurasidone Dose Escalation in Early Nonresponding Patients With Schizophrenia: A Randomized, Placebo-Controlled Study. *The Journal of clinical psychiatry* 2016.
98. Mahal AS, Malik SC, Srinivasamurthy U. Evaluation of loxapine succinate as an anxiolytic in comparison with chlordiazepoxide. *Curr Ther Res Clin Exp* 1976; **20**(1): 84-93.
99. Marder SR, Meibach RC. Risperidone in the treatment of schizophrenia. *Am J Psychiatry* 1994; **151**: 825-35.
100. Marder SR, Kramer M, Ford L, et al. Efficacy and safety of paliperidone extended-release tablets: results of a 6-week, randomized, placebo-controlled study. *Biol Psychiatry* 2007; **62**(12): 1363-70.

101. McDonald RE, Ellsworth RB, Eniss J. Behavioral changes of chronic schizophrenics in response to reserpine. *Archives of Neurology and Psychiatry*; 1956. p. 575-8.
102. McEvoy JP, Daniel DG, Carson WH, Jr., McQuade RD, Marcus RN. A randomized, double-blind, placebo-controlled, study of the efficacy and safety of aripiprazole 10, 15 or 20 mg/day for the treatment of patients with acute exacerbations of schizophrenia. *J Psychiatr Res* 2007; **41**(11): 895-905.
103. McInnes EJ, Walker F, Snelling E. The observer interaction variable in evaluation of socialising properties of pimozide (Orap). *New Zealand Medical Journal*; 1978. p. 170-2.
104. Meltzer HY, Arvanitis L, Bauer D, Rein W, Group M-TS. Placebo-controlled evaluation of four novel compounds for the treatment of schizophrenia and schizoaffective disorder. *American Journal of Psychiatry*. United States of America; 2004. p. 975-84.
105. Meltzer H, Barbato LM, Heisterberg J, Yeung PP, Shapira NA. A randomized, double-blind, placebo-controlled efficacy and safety study of bifeprunox as treatment for patients with acutely exacerbated schizophrenia. *Schizophrenia Bulletin* 2007; **33**(2): 446-.
106. Meltzer HY, Cucchiari J, Silva R, et al. Lurasidone in the treatment of schizophrenia: a randomized, double-blind, placebo- and olanzapine-controlled study. *Am J Psychiatry* 2011; **168**(9): 957-67.
107. Montgomery SA, Green M, Rimon R, et al. Inadequate Treatment Response to Des-Enkephalin-Gamma-Endorphin Compared with Thioridazine and Placebo in Schizophrenia. *Acta Psychiatrica Scandinavica* 1992; **86**(2): 97-103.
108. Nakamura M, Ogasa M, Guarino J, et al. Lurasidone in the treatment of acute schizophrenia: a double-blind, placebo-controlled trial. *J Clin Psychiatry* 2009; **70**(6): 829-36.
109. Nasrallah HA, Silva R, Phillips D, et al. Lurasidone for the treatment of acutely psychotic patients with schizophrenia: a 6-week, randomized, placebo-controlled study. *J Psychiatr Res* 2013; **47**(5): 670-7.
110. Correll CU, Skuban A, Hobart M, et al. Efficacy of brexpiprazole in patients with acute schizophrenia: Review of three randomized, double-blind, placebo-controlled studies. *Schizophrenia research* 2016; **174**(1-3): 82-92.
111. Kinoshita T, Bai YM, Kim JH, Miyake M, Oshima N. Efficacy and safety of asenapine in Asian patients with an acute exacerbation of schizophrenia: a multicentre, randomized, double-blind, 6-week, placebo-controlled study. *Psychopharmacology* 2016; **233**(14): 2663-74.
112. Durgam S, Cutler AJ, Lu K, et al. Cariprazine in acute exacerbation of schizophrenia: a fixed-dose, phase 3, randomized, double-blind, placebo- and active-controlled trial. *The Journal of clinical psychiatry* 2015; **76**(12): e1574-82.
113. Cantillon M. Efficacy and safety of novel dopamine stabilizer RP 5063 in acute schizophrenia and schizoaffective disorder. *Schizophrenia research* 2014; **153** (Suppl 1): S1-S384.
114. Corp MSaD. NCT01617187: A study of the efficacy and safety of asenapine in participants with an acute exacerbation of schizophrenia (P05688). *Clinicaltrials.gov* 2016.
115. Nistico G, Ragozzino D, Marano V. A comparative study of penfluridol and flupentixol in the treatment of chronic schizophrenia. *Journal of Clinical Pharmacology*; 1974. p. 476-82.
116. Ogasa M, Kimura T, Nakamura M, Guarino J. Lurasidone in the treatment of schizophrenia: a 6-week, placebo-controlled study. *Psychopharmacology (Berl)* 2012.
117. Paredes A, Baumgold J, Pugh LA, Ragland R. Clinical judgment in the assessment of psychopharmacological effects. *Journal of Nervous and Mental Disease*; 1966. p. 153-60.

118. Pathiraja AP, Diamond BI, Borison RL, Meibech RC, Anand R. Relationship between creatine phosphokinase, psychotic symptoms and novel antipsychotic drugs. *Schizophrenia Research*; 1995. p. 160-1.
119. Patil ST, Zhang L, Martenyi F, et al. Activation of mGlu2/3 receptors as a new approach to treat schizophrenia: a randomized Phase 2 clinical trial. *NatMed* 2007; **13**(9): 1102-7.
120. Payne P. A Comparison of trifluopromazine, chlorpromazine, and a placebo in twenty-one chronic schizophrenic patients. *Manitoba Medical Review*; 1960. p. 196-8.
121. Peet M, Bethell MS, Coates A, et al. Propranolol in schizophrenia. I. Comparison of propranolol, chlorpromazine and placebo. *British Journal of Psychiatry*; 1981. p. 105-11.
122. Pfizer. Dose-response study to evaluate safety, efficacy, and pharmacokinetics of pf-00217830 compared with placebo in acute exacerbation of schizophrenia. <http://www.clinicaltrials.gov>; 2007.
123. Pi E, Sramek J, Johnson T, et al. Subjective neuroleptic response and treatment outcome under open and double-blind conditions - a preliminary report. *Progress in Neuropsychopharmacology and Biological Psychiatry*; 1990. p. 921-8.
124. Potkin SG, Shipley J, Bera RB, et al. Clinical and pet effects of m100907, a selective 5ht-2a receptor antagonist. *Schizophrenia Research*; 2001. p. 242.
125. Potkin SG, Saha AR, Kujawa MJ, et al. Aripiprazole, an antipsychotic with a novel mechanism of action, and risperidone vs placebo in patients with schizophrenia and schizoaffective disorder. *ArchGenPsychiatry* 2003; **60**(7): 681-90.
126. Potkin SG, Cohen M, Panagides J. Efficacy and tolerability of asenapine in acute schizophrenia: a placebo- and risperidone-controlled trial. *JClinPsychiatry* 2007; **68**(10): 1492-500.
127. Prien RF, Cole JO. High dose chlorpromazine therapy in chronic schizophrenia. Report of National Institute of Mental Health - psychopharmacology research branch collaborative study group. *Archives of General Psychiatry* 1968; **18**: 482-95.
128. Ramu MG, Chaturvedi DD, Venkataram BS, et al. A double blind controlled study on the role of Bahmyadiyoga and Tagara in Jirnomada (chronic schizophrenia). Ayurvedic management of unmada (schizophrenia). New Delhi: Central Council for Research in Ayurveda & Siddha; 1999: 77-88.
129. Ramu MG, Chaturvedi DD, Venkataram BS, et al. A double blind controlled study on the role of Bahmyadiyoga and Tagara in Navonmada (acute schizophrenia). Ayurvedic management of unmada (schizophrenia)  
New Delhi: Central Council for Research in Ayurveda & Siddha; 1999: 69-76.
130. Rappaport M, Hopkins HK, Hall K, Belleza T, Silverman J. Are there schizophrenics for whom drugs may be unnecessary or contraindicated? *IntPharmacopsychiatry* 1978; **13**(2): 100-11.
131. Sakalis G, Chan TL, Sathananthan G, Schooler N, Goldberg S, Gershon S. Relationships among clinical response, extrapyramidal syndrome and plasma chlorpromazine and metabolite ratios. *Communications in Psychopharmacology*; 1977. p. 157-66.
132. Sandison RA, Whitelaw E, Currie JDC. Clinical trials with Melleril (TP21) in the treatment of schizophrenia. A two-year study. *Journal of Mental Science*; 1960. p. 732-41.
133. Saretsky T. Effects of chlorpromazine on primary-process thought manifestations. *Journal of Abnormal Psychology*; 1966. p. 247-52.
134. Scanlan EP, May AE. A controlled trial of Taractan in chronic schizophrenia. *British Journal of Psychiatry*; 1963. p. 418-21.

135. Schmidt ME, Kent JM, Daly E, et al. A double-blind, randomized, placebo-controlled study with JNJ-37822681, a novel, highly selective, fast dissociating D(2) receptor antagonist in the treatment of acute exacerbation of schizophrenia. *European neuropsychopharmacology : the journal of the European College of Neuropsychopharmacology* 2012; **22**(10): 721-33.
136. Selman FB, McClure RF, Helwig H. Loxapine succinate: a double-blind comparison with haloperidol and placebo in acute schizophrenics. *CurrTherResClinExp* 1976; **19**(6): 645-52.
137. Serafetinides EA, Collins S, Clark ML. Haloperidol, clopenthixol, and chlorpromazine in chronic schizophrenia. Chemically unrelated antipsychotics as therapeutic alternatives. *JNervMentDis* 1972; **154**(1): 31-42.
138. Shen JH, Zhao Y, Rosenzweig-Lipson S, et al. A 6-week randomized, double-blind, placebo-controlled, comparator referenced trial of vabicaserin in acute schizophrenia. *J Psychiatr Res* 2014; **53**: 14-22.
139. Shepherd M, Watt DC. A controlled clinical study of chlorpromazine and reserpine in chronic schizophrenia. *Journal of Neurology, Neurosurgery and Psychiatry*; 1956. p. 232-5.
140. Simpson GM, Varga E, Reiss M, Cooper TB, Bergner PE, Lee JH. Bioequivalency of generic and brand-named chlorpromazine. *Clinical Pharmacology and Therapeutics*; 1974. p. 631-41.
141. Sittampalan A, Abeywardana AL. A double blind placebo controlled trial of stemetil (prochlorperazine) on chronic hospitalised schizophrenics. *Ceylon MedJ* 1962; **7**: 97-101.
142. Small JG, Hirsch SR, Arvanitis LA, Miller BG, Link CGG, group. Ss. Quetiapine in patients with schizophrenia. A high- and low-dose comparison with placebo. *ArchGenPsychiatry* 1997; **54**: 549-57.
143. Somerville DM, Cohen PH, Graves GD. Phenothiazine side-effects. Comparison of two major tranquilizers. *Journal of Mental Science*; 1960. p. 1417-24.
144. Spohn HE, Lacoursiere RB, Thompson K, Coyne L. Phenothiazine effects on psychological and psychophysiological dysfunction in chronic schizophrenics. *ArchGenPsychiatry* 1977; **34**(6): 633-44.
145. 049 S. A 6-week, double-blind, randomized, fixed dose, parallel-group study of the efficacy and safety of three dose levels of SM-13496 (lurasidone) compared to placebo and haloperidol in patients with schizophrenia who are experiencing an acute exacerbation of symptoms. *Center for drug evaluation and research Application number 200603 Medical review(s)* <http://www.fda.gov> 2010.
146. 2000 S. Center for drug evaluation and research approval package for application number 20-825. Medical review. <http://www.fda.gov> 2000.
147. Potkin SG, Litman RE, Torres R, Wolfgang CD. Efficacy of iloperidone in the treatment of schizophrenia: initial phase 3 studies. *J Clin Psychopharmacol* 2008; **28**(2 Suppl 1): S4-11.
148. 2002 S. Center for drug evaluation and research. Application number 21-436. Medical review(s). <http://www.fda.gov> 2002.
149. 94202 S. Center for drug evaluation and research. Application number 21-436. Medical review(s). [www.fda.gov](http://www.fda.gov) 2002.
150. Durgam S, Litman RE, Papadakis K, Li D, Nemeth G, Laszlovszky I. Cariprazine in the treatment of schizophrenia: a proof-of-concept trial. *International clinical psychopharmacology* 2016; **31**(2): 61-8.
151. Kane JM, Zukin S, Wang Y, et al. Efficacy and Safety of Cariprazine in Acute Exacerbation of Schizophrenia: Results From an International, Phase III Clinical Trial. *Journal of clinical psychopharmacology* 2015; **35**(4): 367-73.

152. 1996 SR-U-. Office of Clinical pharmacology and biopharmacy review. NDA number: 20272. *Janssen-Cilag, data on file* 1996.
153. Swanson C, Canive JM, Krakowski M, Beyer J, Nasarallah H, Miller A. A multi centre, double-blind, double-dummy, placebo-controlled, randomised, adaptive, dose-range study to evaluate the safety and efficacy of SB-773812 administered once daily for 12 weeks in adults with schizophrenia. <http://www.clinicaltrials.gov>; 2005.
154. Tetreault L, Bordeleau JM, Albert JM, Rajotte P. A comparative study of fluphenazine enanthale, fluphenazine bichlorhydrate and placebo on the chronic schizophrenic. *Canadian Psychiatric Association Journal*; 1969. p. 191-8.
155. Tetreault L, Bordeleau JM, Gauthier R, Vulpe M, Lapointe L. Comparative study of TPS-23, chlorpromazine and placebo in chronic schizophrenic patients. *DisNervSyst* 1969; **30**(2): Suppl-84.
156. Tzimos A, Samokhvalov V, Kramer M, et al. Safety and tolerability of oral paliperidone extended-release tablets in elderly patients with schizophrenia: a double-blind, placebo-controlled study with six-month open-label extension. *AmJGeriatrPsychiatry* 2008; **16**(1): 31-43.
157. van der Velde CD, Kiltie H. Effectiveness of loxapine succinate in acute schizophrenia: a comparative study with thiothixene. *Curr Ther Res Clin Exp* 1975; **17**(1): 1-12.
158. van Kammen DP. A randomized, controlled, dose-ranging trial of sertindole in patients with schizophrenia. *Psychopharmacology* 1996; **124**: 168-75.
159. Vichaiya V. Clinical trial of haloperidol in schizophrenia. *Journal of Psychiatric Association of Thailand* 1971; **16**(1): 31-43.
160. Walsh GP, Walton D, Black DA. The relative efficacy of 'vespral' and chlorpromazine in the treatment of a group of chronic schizophrenic patients. *Journal of Mental Science*; 1959. p. 199-209.
161. Wolpert ASCMS. Thiothixene, thioridazine, and placebo in male chronic schizophrenic patients. *Clinical Pharmacology and Therapeutics*; 1968. p. 456-64.
162. Wyeth. A randomized, double-blind, placebo-controlled, olanzapine-referenced, parallel group safety, efficacy, and tolerability study of sca-136 in subjects with acute exacerbations of schizophrenia. <http://www.clinicaltrials.gov>; 2005.
163. Zborowski J, Schmitz P, Staser J, et al. Efficacy and safety of sertindole in a trial of schizophrenic patients. *BiolPsychiatry* 1995; **37**: 661-2.
164. Zimbroff DL, Kane JM, Tamminga CA, et al. Controlled, dose response study of sertindole and haloperidol in the treatment of schizophrenia. *AmJPsychiatry* 1997; **154**(6): 782-91.

## **Supplementary Table S5**

**Assessment with the Cochrane risk of bias tool**



**Table S5a:** Risk of bias summary: judgements about each bias item for each study

|                | Random sequence generation (selection bias) | Allocation concealment (selection bias) | Blinding of participants and personnel (performance bias) | Blinding of outcome assessment (detection bias) | Incomplete outcome data (attrition bias) | Selective reporting (reporting bias) | Other bias |
|----------------|---------------------------------------------|-----------------------------------------|-----------------------------------------------------------|-------------------------------------------------|------------------------------------------|--------------------------------------|------------|
| Adelson 1962   | ?                                           | +                                       | +                                                         | +                                               | ?                                        | -                                    | +          |
| Ahmed 2007     | +                                           | +                                       | ?                                                         | ?                                               | -                                        | ?                                    | ?          |
| Arvanitis 1997 | ?                                           | ?                                       | ?                                                         | ?                                               | -                                        | +                                    | +          |
| Augustin 1996  | ?                                           | ?                                       | ?                                                         | ?                                               | ?                                        | ?                                    | ?          |
| Baker 1959     | ?                                           | +                                       | +                                                         | +                                               | ?                                        | +                                    | +          |
| Ban 1975       | ?                                           | ?                                       | +                                                         | +                                               | -                                        | -                                    | +          |
| Barbato 2007c  | ?                                           | ?                                       | ?                                                         | ?                                               | ?                                        | ?                                    | ?          |
| Barbato 2007d  | ?                                           | ?                                       | ?                                                         | ?                                               | ?                                        | ?                                    | ?          |
| Barron 1963    | ?                                           | ?                                       | +                                                         | +                                               | ?                                        | -                                    | +          |
| Beasley 1996a  | +                                           | +                                       | +                                                         | +                                               | -                                        | +                                    | +          |
| Beasley 1996b  | +                                           | +                                       | +                                                         | +                                               | -                                        | +                                    | ?          |
| Bechelli 1983  | +                                           | ?                                       | ?                                                         | ?                                               | -                                        | -                                    | -          |
| Bishop 1963c   | ?                                           | ?                                       | ?                                                         | ?                                               | ?                                        | ?                                    | ?          |
| Bishop 1964    | ?                                           | ?                                       | +                                                         | +                                               | ?                                        | -                                    | +          |
| Borison 1989   | ?                                           | ?                                       | ?                                                         | ?                                               | -                                        | +                                    | +          |
| Borison 1991   | ?                                           | ?                                       | ?                                                         | ?                                               | ?                                        | -                                    | +          |
| Borison 1992   | ?                                           | ?                                       | +                                                         | +                                               | -                                        | +                                    | -          |

|                      |   |   |   |   |   |   |   |
|----------------------|---|---|---|---|---|---|---|
| Borison 1996         | ? | ? | + | + | - | + | + |
| Bugarski-Kirola 2014 | ? | ? | ? | ? | + | + | + |
| Casey 1960           | ? | + | + | + | - | - | + |
| Casey 2008           | ? | ? | ? | ? | - | + | + |
| Charalampous 1974    | ? | ? | + | + | ? | - | + |
| Chouinard 1975       | ? | ? | + | + | - | + | + |
| Chouinard 1990       | ? | ? | + | + | - | - | - |
| Chouinard 1993       | ? | ? | + | + | + | - | + |
| Clark 1968           | ? | ? | + | + | - | + | + |
| Clark 1969           | ? | ? | ? | ? | ? | - | - |
| Clark 1970a          | ? | ? | + | + | ? | - | + |
| Clark 1970b          | ? | ? | ? | ? | ? | - | + |
| Clark 1971a          | ? | ? | + | + | ? | - | + |
| Clark 1972           | ? | ? | + | + | - | + | + |
| Clark 1975           | + | ? | + | + | + | + | + |
| Clark 1977           | ? | + | + | + | - | + | + |
| Clark 1977a          | ? | ? | + | + | - | - | - |
| Cockburn 1959        | + | ? | ? | ? | ? | - | + |
| Cole 1964            | ? | ? | + | + | - | - | + |
| Cooper 2000a         | ? | ? | + | + | - | + | + |
| Cooper 2000b         | + | ? | ? | ? | - | + | + |
| Correll 2015         | + | ? | ? | ? | + | + | + |
| Corrigan 2004        | + | + | + | + | - | - | + |
| Cutler 2006          | ? | ? | + | + | + | - | + |
| Cutler 2008          | + | + | + | + | - | + | + |
| Cutler 2010          | ? | ? | ? | ? | + | - | + |
| Daniel 1999          | + | ? | ? | ? | - | + | + |
| Davidson 2007        | + | + | + | + | - | - | + |
| Downing 2014         | ? | ? | + | + | + | + | + |
| Durgam 2014          | ? | ? | ? | ? | + | + | + |
| Egan 2013            | + | + | + | + | + | + | + |
| Engelhardt 1969      | ? | ? | + | + | ? | - | + |
| Evans 1972           | ? | ? | + | + | - | - | + |
| Fabre 1995           | ? | ? | ? | ? | - | - | + |

|                           |   |   |   |   |   |   |   |
|---------------------------|---|---|---|---|---|---|---|
| Finkle 1965               | + | ? | ? | ? | - | + | + |
| Fleming 1959              | ? | + | + | + | ? | - | + |
| Gallant 1963              | ? | ? | ? | ? | ? | - | + |
| Garcia 2009               | + | ? | + | + | - | - | + |
| Garry 1962                | + | ? | ? | ? | + | - | + |
| Geffen 2012               | + | + | ? | ? | - | + | + |
| Goldberg 1972             | ? | ? | ? | ? | - | - | + |
| Hall 1955                 | ? | ? | - | - | ? | - | + |
| Hamilton 1960             | ? | ? | + | + | ? | - | + |
| Hamilton 1963             | ? | ? | ? | ? | ? | - | + |
| Hamryd 1989               | ? | ? | + | + | - | - | - |
| Hera 041-021              | ? | ? | + | + | ? | ? | ? |
| Hera 041-022              | ? | ? | + | + | ? | ? | ? |
| Herrera 1990              | ? | ? | + | + | - | ? | + |
| Hickerson 1956            | ? | + | + | + | - | - | + |
| Hine 1958                 | + | + | ? | ? | - | + | + |
| Honigfeld 1984a           | ? | ? | + | + | - | - | - |
| Howard 1974               | ? | ? | + | + | - | + | + |
| Jann 1997                 | ? | ? | + | + | - | - | + |
| Janssen CR012625 Hirayasu | ? | ? | + | + | - | ? | ? |
| Johnson NCT00397033Canuso | ? | ? | ? | ? | + | ? | ? |
| Johnson NCT00412373Canuso | ? | ? | + | + | + | ? | ? |
| Johnson NCT00524043Copola | ? | ? | + | + | + | ? | ? |
| Johnstone 1978            | + | + | + | + | + | + | + |
| Judd 1973                 | ? | ? | ? | ? | ? | - | + |
| Kahn 2007                 | ? | ? | + | + | + | + | + |
| Kane 2002                 | ? | ? | ? | ? | + | + | + |
| Kane 2007b                | + | ? | ? | ? | - | + | + |
| Kane 2010a                | ? | ? | ? | ? | ? | ? | ? |
| Kane 2015                 | + | + | + | + | + | + | + |
| Karn 1961                 | ? | ? | + | + | - | - | + |

|                            |   |   |   |   |   |   |   |
|----------------------------|---|---|---|---|---|---|---|
| Keck 1998                  | + | ? | ? | ? | + | + | - |
| King 1959                  | ? | ? | ? | ? | ? | - | + |
| Kinon 2011                 | + | ? | ? | ? | - | + | ? |
| Klein 1973                 | ? | ? | + | + | ? | - | + |
| Klieser 1989               | + | ? | ? | ? | ? | - | + |
| Kurland 1961               | ? | ? | + | - | - | - | + |
| Lemmer 1993                | ? | ? | ? | ? | ? | - | ? |
| Levita 1961                | ? | ? | + | + | ? | - | + |
| Lieberman 2015             | + | + | + | + | + | + | + |
| Lindenmayer 2008           | + | + | + | + | + | + | + |
| Litman et al. 2016         | + | + | + | + | + | + | + |
| Litmann 2014               | + | + | + | + | ? | + | + |
| Little 1958                | ? | ? | + | + | ? | - | + |
| Mahal 1976                 | ? | ? | ? | ? | - | - | + |
| Marder 1994                | + | ? | ? | ? | - | - | + |
| Marder 2007c               | + | + | ? | ? | + | + | + |
| McDonald 1956              | + | ? | ? | ? | ? | - | + |
| McEvoy 2007b               | ? | ? | ? | ? | + | + | + |
| McInness 1978              | ? | ? | ? | ? | ? | - | + |
| Meltzer 2004               | + | ? | ? | ? | + | + | + |
| Meltzer 2007a              | ? | ? | ? | ? | - | ? | ? |
| Montgomery 1992            | ? | ? | ? | ? | - | ? | ? |
| NCT00905307 Correll 2016   | + | + | + | + | + | + | - |
| NCT01098110 Kinoshita 2016 | + | ? | + | + | - | + | + |
| NCT01104766 Durgam 2016    | ? | ? | ? | ? | + | + | + |
| NCT01490086 Cantillon 2014 | ? | ? | ? | ? | - | ? | ? |
| NCT0161717187              | ? | ? | ? | ? | ? | ? | ? |
| Nistico 1974               | ? | ? | + | + | - | - | + |
| Paredes 1966               | ? | ? | ? | ? | ? | - | + |
| Pathirija 1995             | ? | ? | ? | ? | ? | ? | ? |
| Patil 2007                 | ? | ? | ? | ? | - | - | + |
| Payne 1960                 | ? | + | + | + | ? | - | + |
| Peet 1981                  | ? | ? | - | - | ? | - | + |
| Pfizer 2008                | ? | ? | ? | ? | ? | ? | ? |
| Pi 1990                    | ? | ? | ? | ? | ? | - | + |
| Potkin 2001                | ? | ? | ? | ? | ? | ? | ? |

|                          |   |   |   |   |   |   |   |
|--------------------------|---|---|---|---|---|---|---|
| Potkin 2003              | ? | ? | ? | ? | + | - | + |
| Potkin 2007c             | ? | ? | + | + | + | + | - |
| Prien 1968a              | ? | ? | ? | ? | ? | - | + |
| Ramu 1999                | + | + | ? | ? | - | - | + |
| Ramu 1999a               | + | ? | ? | ? | - | - | + |
| Rappaport 1978           | ? | ? | ? | ? | ? | - | + |
| Sakalis 1977             | ? | ? | + | + | - | + | + |
| Sandison 1960            | ? | + | + | + | ? | - | + |
| Saretsky 1966            | ? | ? | + | + | ? | - | + |
| Scanlan 1963             | ? | + | + | + | - | - | + |
| Schmidt 2014             | + | + | + | + | ? | - | + |
| Selman 1976              | ? | ? | + | + | - | - | + |
| Serafetinides 1972       | ? | ? | + | + | - | - | + |
| Shen 2014                | + | + | + | + | - | - | + |
| Sheperd 1956             | ? | ? | + | + | ? | - | + |
| Simpson 1974             | ? | ? | ? | ? | - | - | + |
| Sittampalan 1962         | ? | + | ? | ? | ? | - | + |
| Small 1997               | + | + | ? | ? | - | + | + |
| Somerville 1960          | ? | + | + | + | ? | - | + |
| Spohn 1977               | ? | + | + | + | - | - | + |
| Study 006 Ogasa 2012     | + | + | + | + | + | + | + |
| Study 049                | + | + | + | + | + | + | + |
| Study 115 2000           | + | ? | ? | ? | - | ? | + |
| Study 196 Nakamura 2009  | + | + | + | + | - | + | + |
| Study 229 Nasrallah 2013 | + | + | + | + | + | + | + |
| Study 231 Meltzer 2011   | + | + | + | + | + | + | + |
| Study 233 Loebel 2013    | + | + | + | + | + | + | + |
| Study 3000 Potkin 2008   | + | + | + | + | + | - | + |
| Study 3004 Potkin 2008   | + | + | + | + | - | - | + |
| Study 3005 Potkin 2008   | + | + | + | + | + | - | + |
| Study 93202 2002         | ? | ? | ? | ? | - | - | + |

|                             |   |   |   |   |   |   |   |
|-----------------------------|---|---|---|---|---|---|---|
| Study 94202 2002            | ? | ? | ? | ? | + | - | + |
| Study RGH-MD-03 Durgam 2016 | ? | ? | ? | ? | + | + | + |
| Study RGH-MD-05 Kane 2015   | ? | ? | ? | ? | + | + | + |
| Study Ris-USA-72 1996       | ? | ? | ? | ? | + | - | + |
| Swanson 2005                | ? | ? | ? | ? | ? | ? | ? |
| Tetreault 1969a             | + | ? | + | + | ? | - | - |
| Tetreault 1969 low          | + | ? | + | + | - | + | + |
| Tzimos 2008                 | + | ? | ? | ? | - | + | + |
| van der Velde 1975          | ? | ? | ? | ? | - | ? | + |
| van Kammen 1996             | + | + | ? | ? | + | + | + |
| Vichaya 1971                | ? | + | - | - | + | - | + |
| Walsh 1959                  | ? | + | + | + | ? | - | + |
| Wolpert 1968                | ? | ? | - | - | ? | - | + |
| Wyeth 2005                  | ? | ? | ? | ? | ? | ? | ? |
| Zborowski 1995              | + | + | ? | ? | ? | ? | ? |
| Zimbroff 1997               | + | + | ? | ? | - | - | + |

**Table S5b:** Risk of bias graph: review authors' judgements (Low, Unclear and High) about each risk of bias item presented as percentages across all included studies.

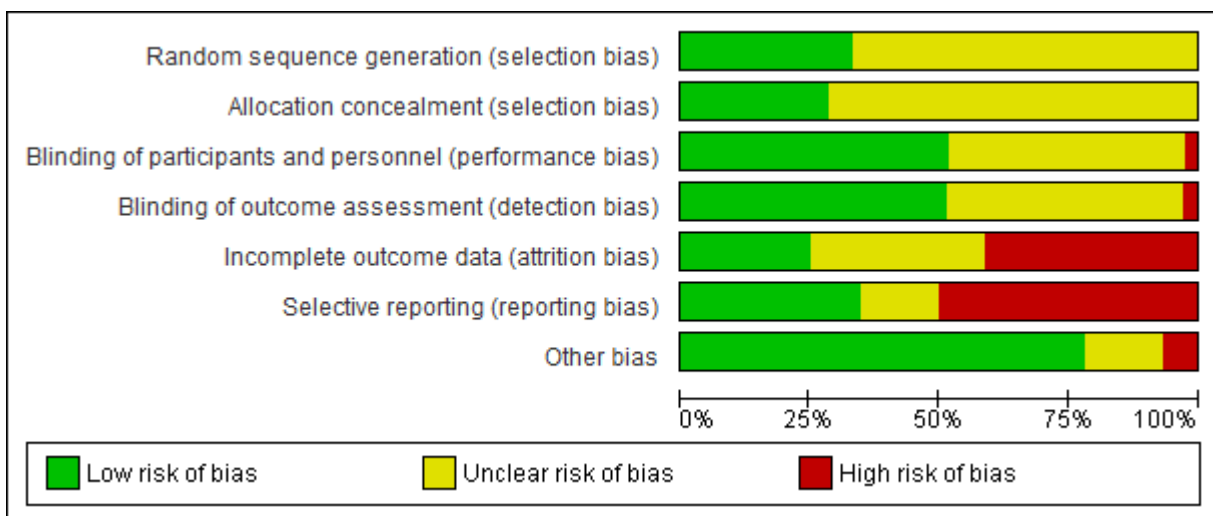

## **Supplementary Table S6**

### **Individual response criteria and Odds Ratios**

**Table S6a: Combined response criteria**

| All studies (preferred criterion $\geq 50\%$ PANSS/BPRS reduction or CGI at least much improved, but authors' criteria were used when not available) |                                              |                                                                                                                              | $\geq 20\%$ PANSS/BPRS reduction or CGI at least minimally better |                                              |                                                                                                                              | $\geq 50\%$ PANSS/BPRS reduction or CGI at least much improved |                                             |                                                                                                                               |
|------------------------------------------------------------------------------------------------------------------------------------------------------|----------------------------------------------|------------------------------------------------------------------------------------------------------------------------------|-------------------------------------------------------------------|----------------------------------------------|------------------------------------------------------------------------------------------------------------------------------|----------------------------------------------------------------|---------------------------------------------|-------------------------------------------------------------------------------------------------------------------------------|
| Drug<br>N<br>n<br>%                                                                                                                                  | PBO<br>N<br>n<br>%                           | RR/OR/RD/NNT (95% CrI), I <sup>2</sup>                                                                                       | Drug<br>N<br>n<br>%                                               | PBO<br>N<br>n<br>%                           | RR/OR/RD/NNT (95% CrI), I <sup>2</sup>                                                                                       | Drug<br>N<br>n<br>%                                            | PBO<br>N<br>n<br>%                          | RR/OR/RD/NNT (95% CrI), I <sup>2</sup>                                                                                        |
| 97<br>13382<br><b>34%</b><br><b>(30%,39%)</b>                                                                                                        | 97<br>6780<br><b>19%</b><br><b>(16%,21%)</b> | OR: 2.79 (2.40,3.31)<br>RR: 1.94 (1.76,2.18)<br>RD: 0.17 (0.14,0.20)<br>NNT: 6 (5,7)<br>I <sup>2</sup> for OR: 69% (55%,80%) | 46<br>5878<br><b>51%</b><br><b>(45%,57%)</b>                      | 46<br>3040<br><b>30%</b><br><b>(27%,34%)</b> | OR: 2.87 (2.43,3.47)<br>RR: 1.75 (1.59,1.97)<br>RD: 0.22 (0.19,0.26)<br>NNT: 5 (4,5)<br>I <sup>2</sup> for OR: 55% (30%,73%) | 38<br>5689<br><b>23%</b><br><b>(17%,31%)</b>                   | 38<br>2714<br><b>13%</b><br><b>(9%,16%)</b> | OR: 2.59 (2.06,3.40)<br>RR: 1.96 (1.65,2.44)<br>RD: 0.13 (0.09,0.17)<br>NNT: 8 (6-11)<br>I <sup>2</sup> for OR: 61% (34%,80%) |

N= number of studies, n=number of total participants, %=percentage of responders, PANSS = Positive and Negative Syndrome Scale<sup>1</sup>, BPRS = Brief Psychiatric Rating Scale<sup>2</sup>, CGI = Clinical Global Impression Scale<sup>3</sup>, RR = relative risk, OR = odds ratio, RD = absolute risk difference, NNT = number needed to treat (NNTs were calculated as the inverse of the risk differences and rounded up as it is the convention<sup>4</sup>)

**Table S6b: Individual response criteria**

| $\geq 20\%$ PANSS/BPRS reduction             |                                              |                                                                                                                             | CGI at least minimally better                |                                              |                                                                                                                              | $\geq 50\%$ PANSS/BPRS reduction             |                                              |                                                                                                                              | CGI at least much better                     |                                             |                                                                                                                               |
|----------------------------------------------|----------------------------------------------|-----------------------------------------------------------------------------------------------------------------------------|----------------------------------------------|----------------------------------------------|------------------------------------------------------------------------------------------------------------------------------|----------------------------------------------|----------------------------------------------|------------------------------------------------------------------------------------------------------------------------------|----------------------------------------------|---------------------------------------------|-------------------------------------------------------------------------------------------------------------------------------|
| Drug<br>N<br>n<br>%                          | PBO<br>N<br>n<br>%                           | RR/OR/RD/NNT (95% CrI), I <sup>2</sup>                                                                                      | Drug<br>N<br>n<br>%                          | PBO<br>N<br>n<br>%                           | RR/OR/RD/NNT (95% CrI), I <sup>2</sup>                                                                                       | Drug<br>N<br>n<br>%                          | PBO<br>N<br>n<br>%                           | RR/OR/RD/NNT (95% CrI), I <sup>2</sup>                                                                                       | Drug<br>N<br>n<br>%                          | PBO<br>N<br>n<br>%                          | RR/OR/RD/NNT (95% CrI), I <sup>2</sup>                                                                                        |
| 23<br>4138<br><b>53%</b><br><b>(48%,59%)</b> | 23<br>2168<br><b>34%</b><br><b>(30%,37%)</b> | OR: 2.44 (2.09,2.89)<br>RR: 1.59 (1.47,1.75)<br>RD: 0.20 (0.17,0.24)<br>NNT: 5 (4-6)<br>I <sup>2</sup> for OR: 41% (5%,71%) | 26<br>2231<br><b>49%</b><br><b>(39%,61%)</b> | 26<br>1126<br><b>27%</b><br><b>(21%,33%)</b> | OR: 3.60 (2.65,5.12)<br>RR: 1.99 (1.64,2.50)<br>RD: 0.24 (0.18,0.31)<br>NNT: 4 (3-5)<br>I <sup>2</sup> for OR: 58% (28%,79%) | 14<br>2960<br><b>23%</b><br><b>(16%,32%)</b> | 14<br>1414<br><b>14%</b><br><b>(10%,19%)</b> | OR: 2.09 (1.69,2.60)<br>RR: 1.71 (1.45,2.13)<br>RD: 0.10 (0.07,0.13)<br>NNT: 10 (8-14)<br>I <sup>2</sup> for OR: 13% (0,64%) | 23<br>2707<br><b>22%</b><br><b>(14%,34%)</b> | 23<br>1280<br><b>11%</b><br><b>(7%,17%)</b> | OR: 3.10 (2.06,5.22)<br>RR: 2.20 (1.62,3.36)<br>RD: 0.14 (0.08,0.20)<br>NNT: 7 (5-13)<br>I <sup>2</sup> for OR: 72% (44%,89%) |

N= number of studies, n=number of total participants, %=percentage of responders, PANSS = Positive and Negative Syndrome Scale, BPRS = Brief Psychiatric Rating Scale, CGI = Clinical Global Impression Scale, RR = relative risk, OR = odds ratio, RD = absolute risk difference, NNT = number needed to treat (NNTs were calculated as the inverse of the risk differences and rounded up as it is the convention)



## References

1. Kay SR, Fiszbein A, Opler LA. The positive and negative syndrome scale (PANSS) for schizophrenia. *SchizophrBull* 1987;13:261-75.
2. Overall JE, Gorham DR. The Brief Psychiatric Rating Scale. *PsycholRep* 1962;10:790-812.
3. Guy W. Clinical Global Impression. In: ECDEU assessment manual for psychopharmacology, revised (DHEW Publ No ADM 76-338). Rockville, MD: National Institute of Mental Health; 1976:218-22.
4. Higgins JPT, Green S. *Cochrane Handbook for Systematic Reviews of Interventions Version 5.1.0* [updated March 2011]. Chichester, UK: Wiley and Sons; 2011.

## **Supplementary Figure S2**

**Results of the individual drugs in the various outcomes**

# Overall efficacy

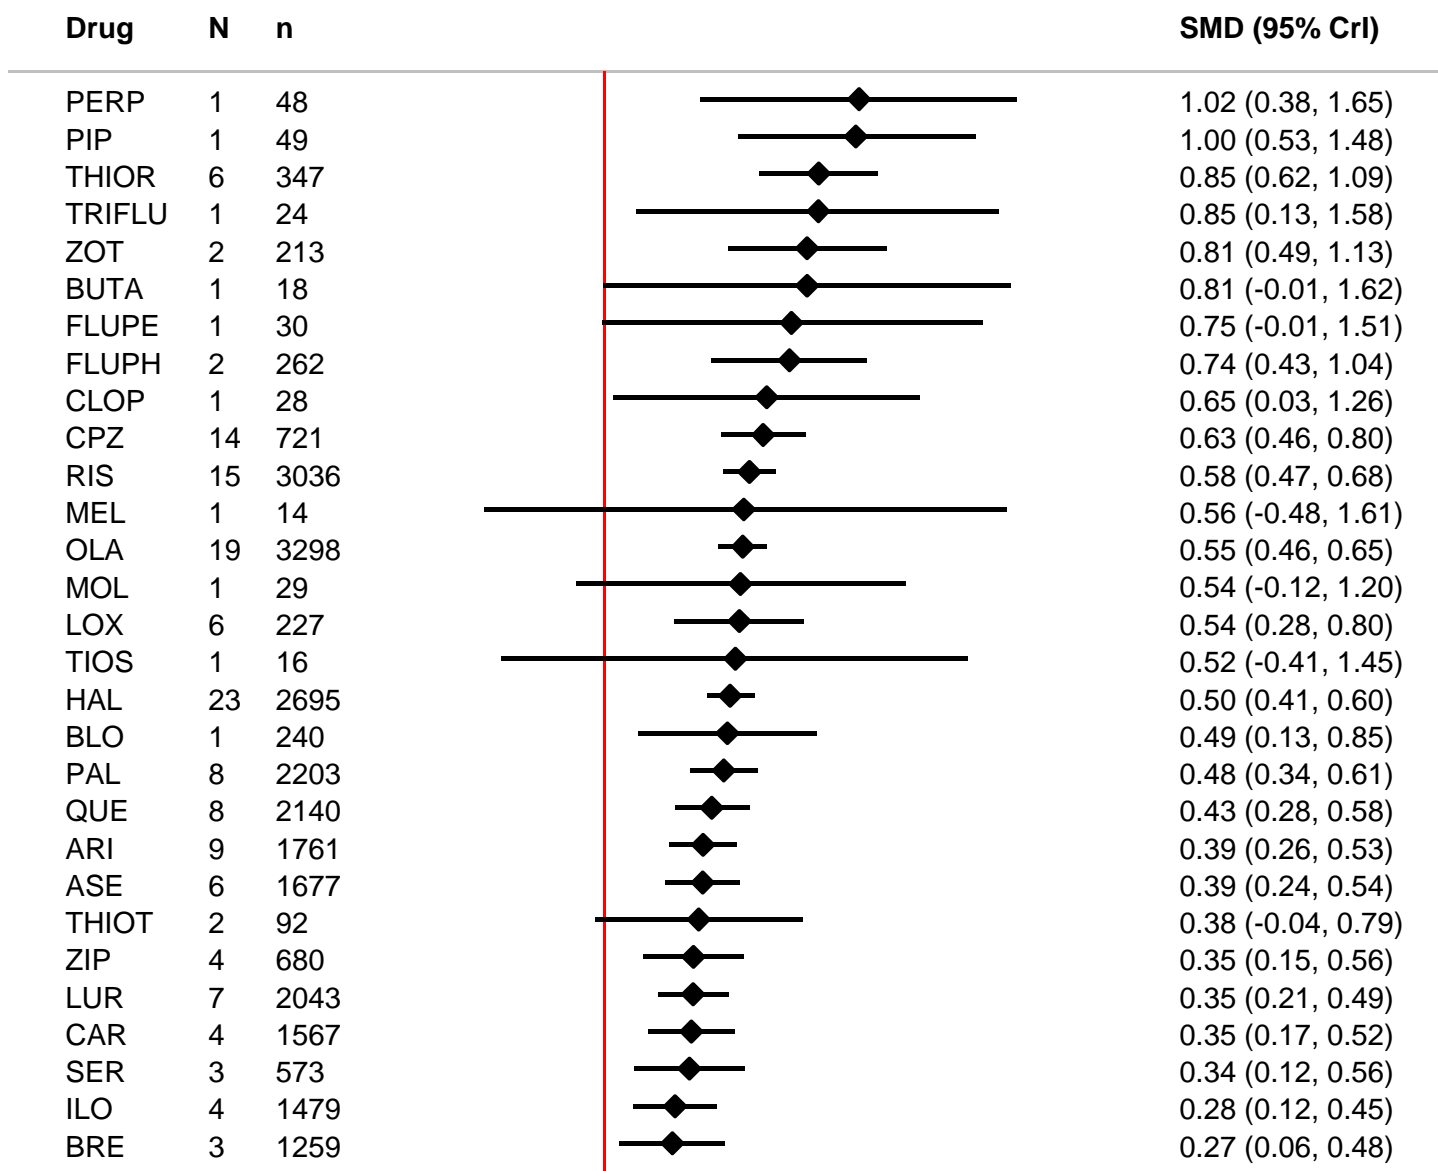

Heterogeneity SD=0.15 (0.11, 0.20)

Favours placebo ← → Favours drug

# Response

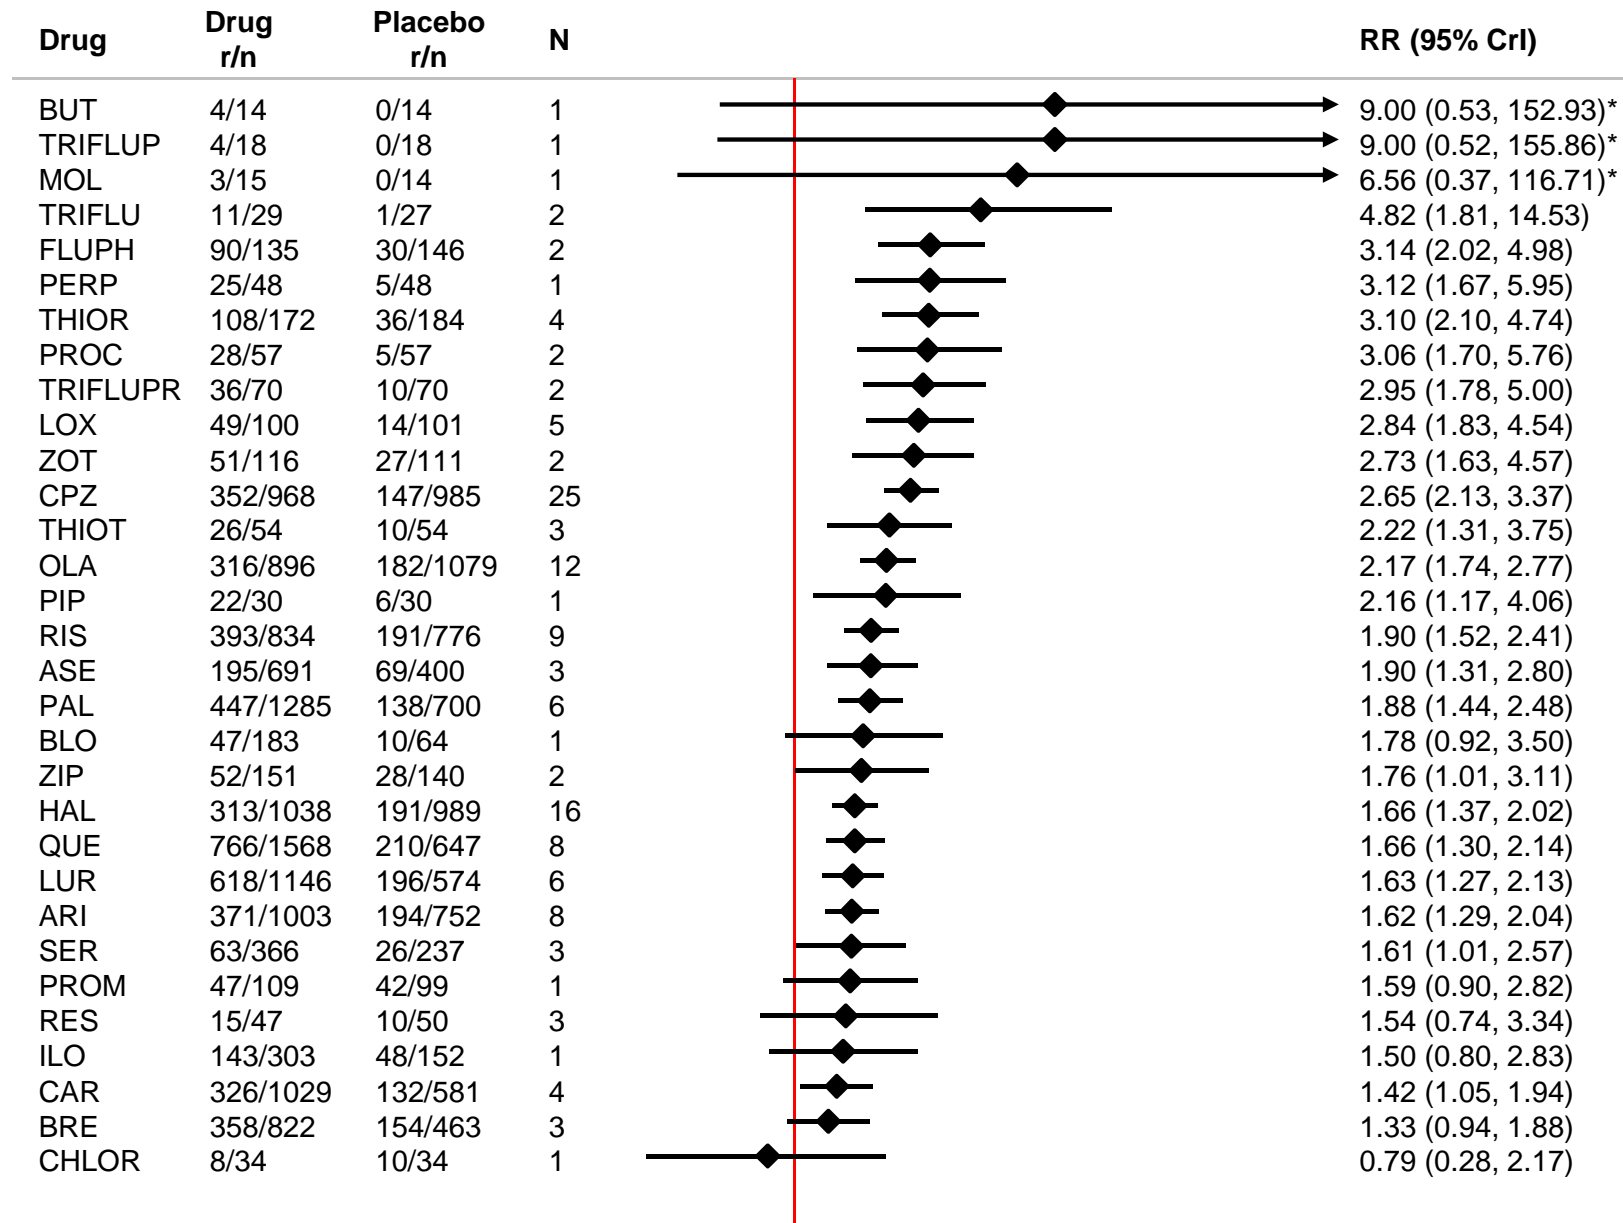

Heterogeneity  $SD=0.28$  (0.20, 0.38)

.2

1

5

25

100

Favours placebo ← → Favours drug

# Drop-outs (any reason)

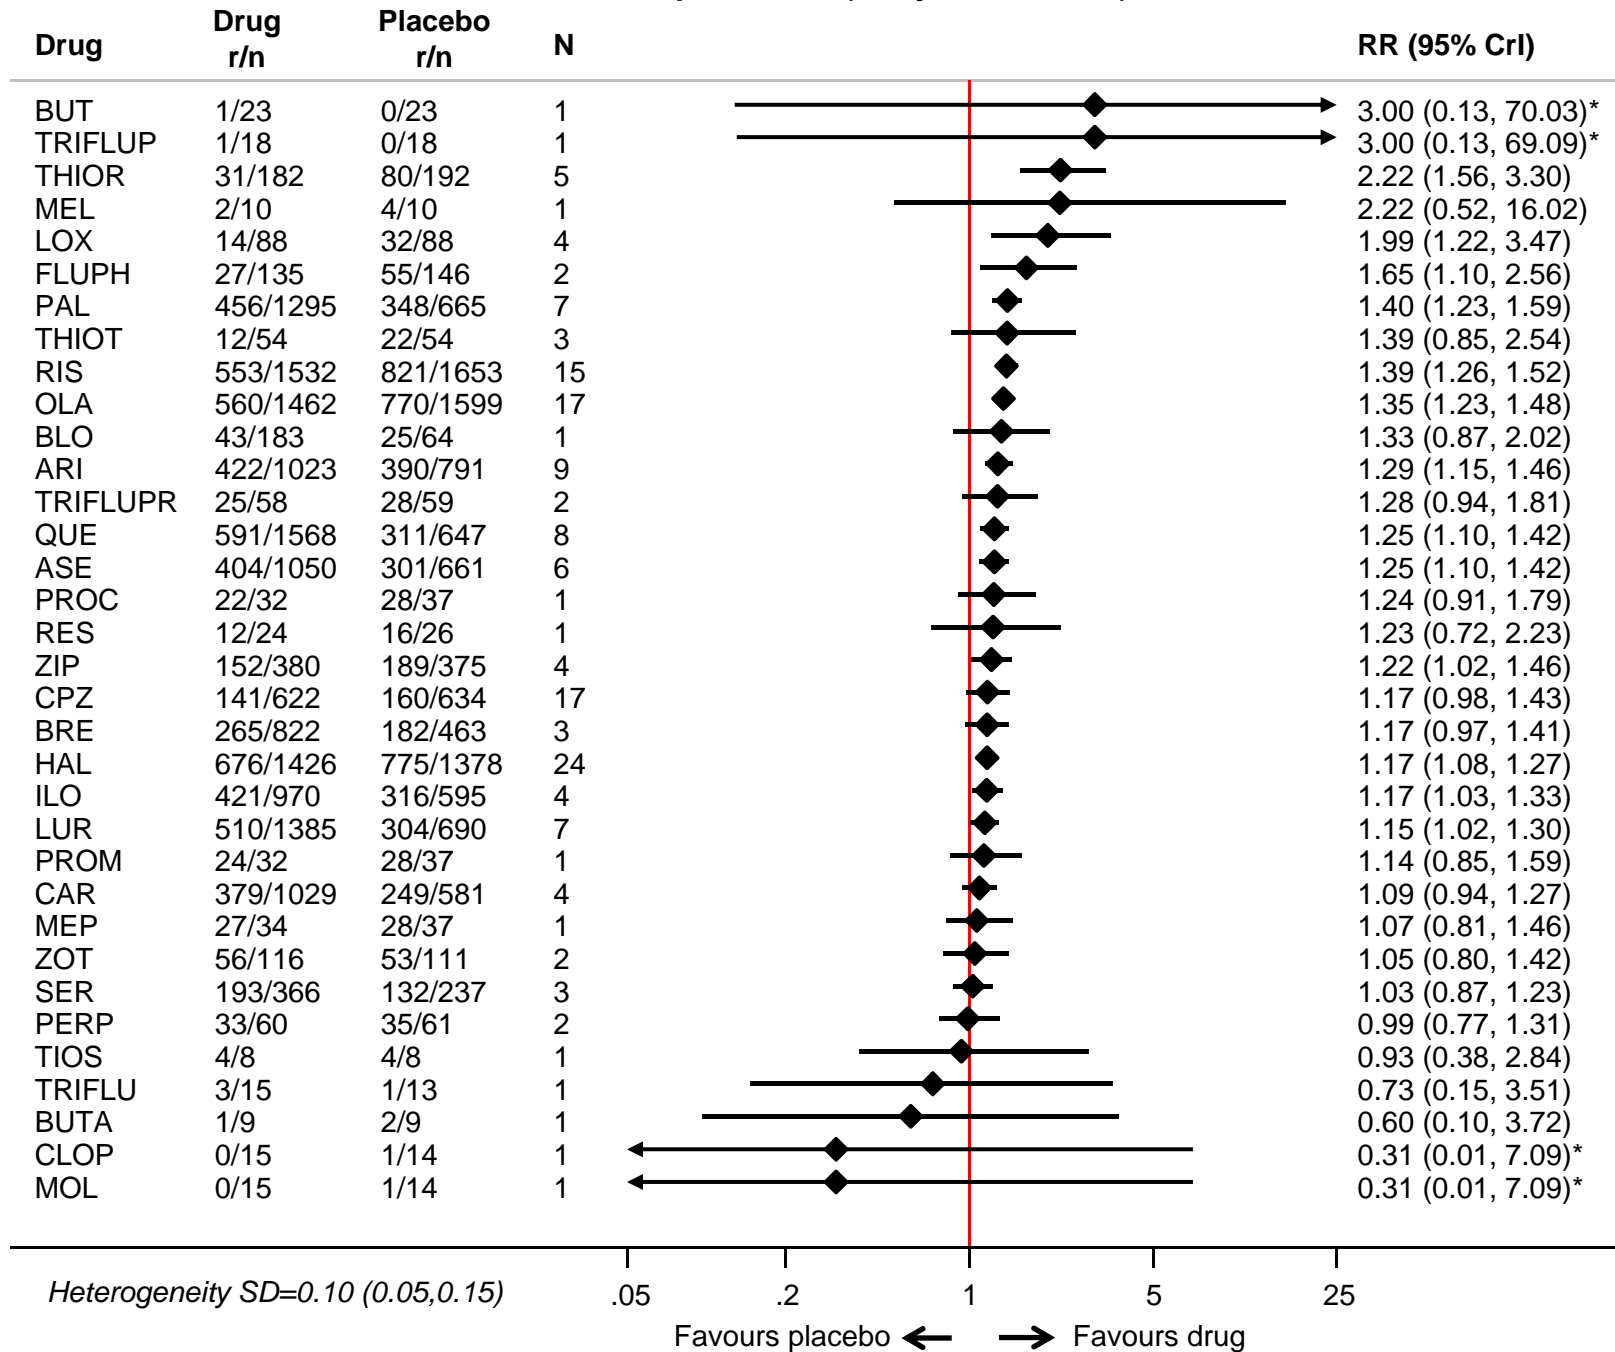

## Drop-outs (inefficacy)

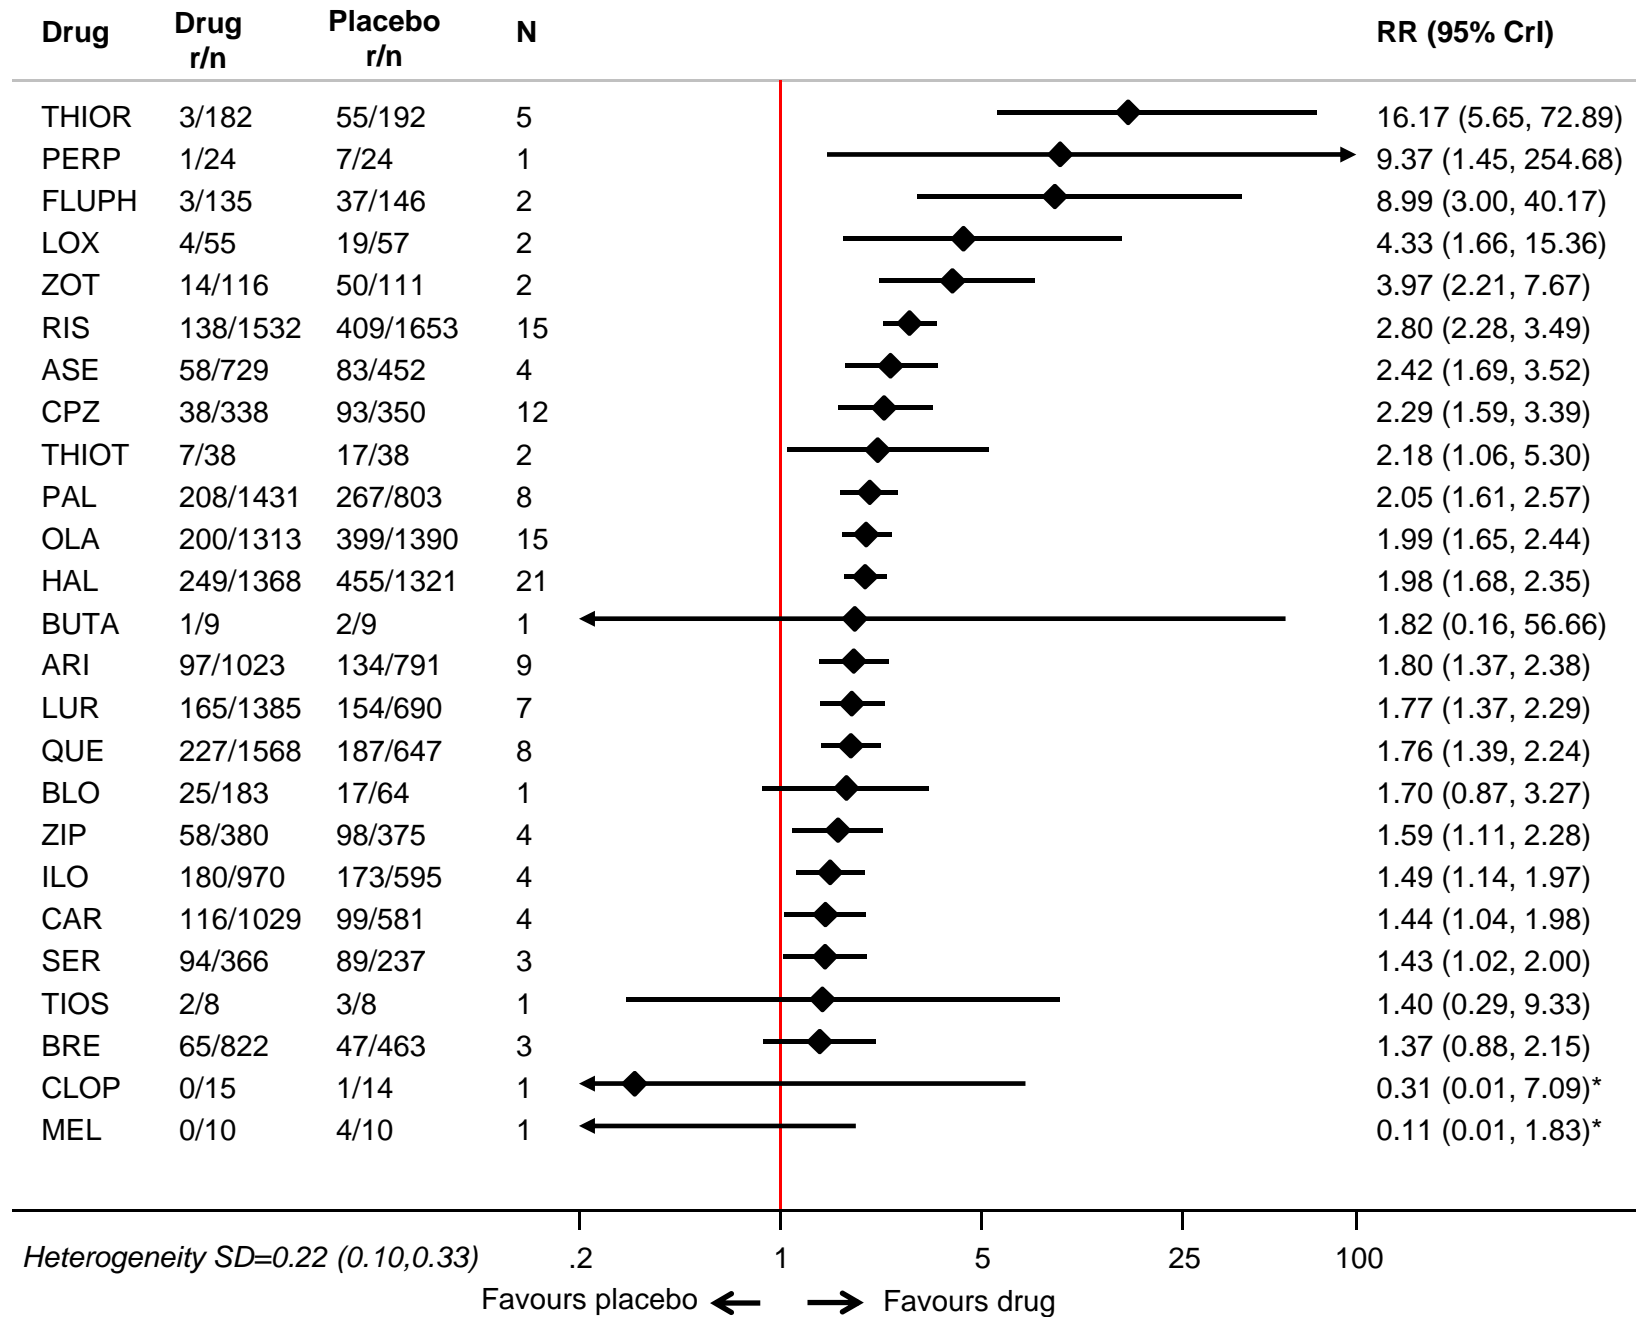

# Depression

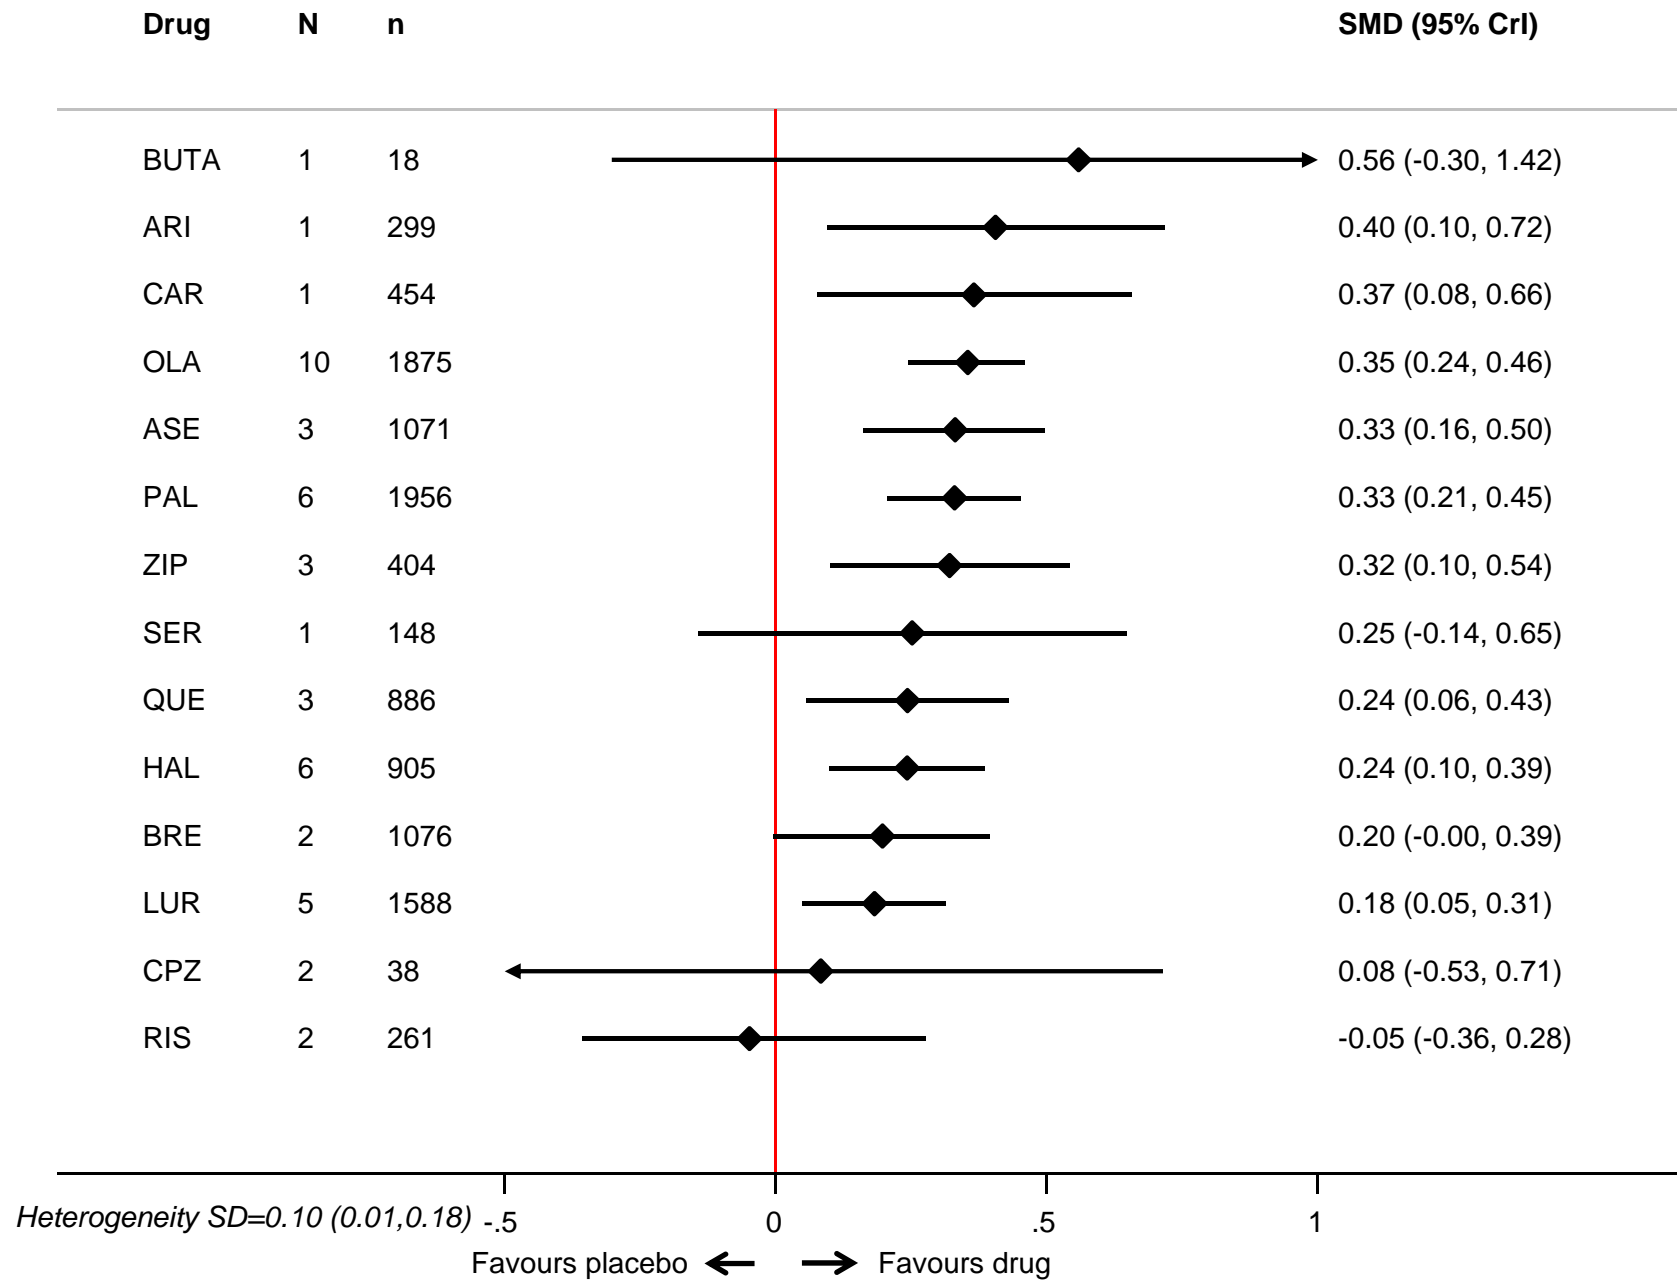

# Quality of life

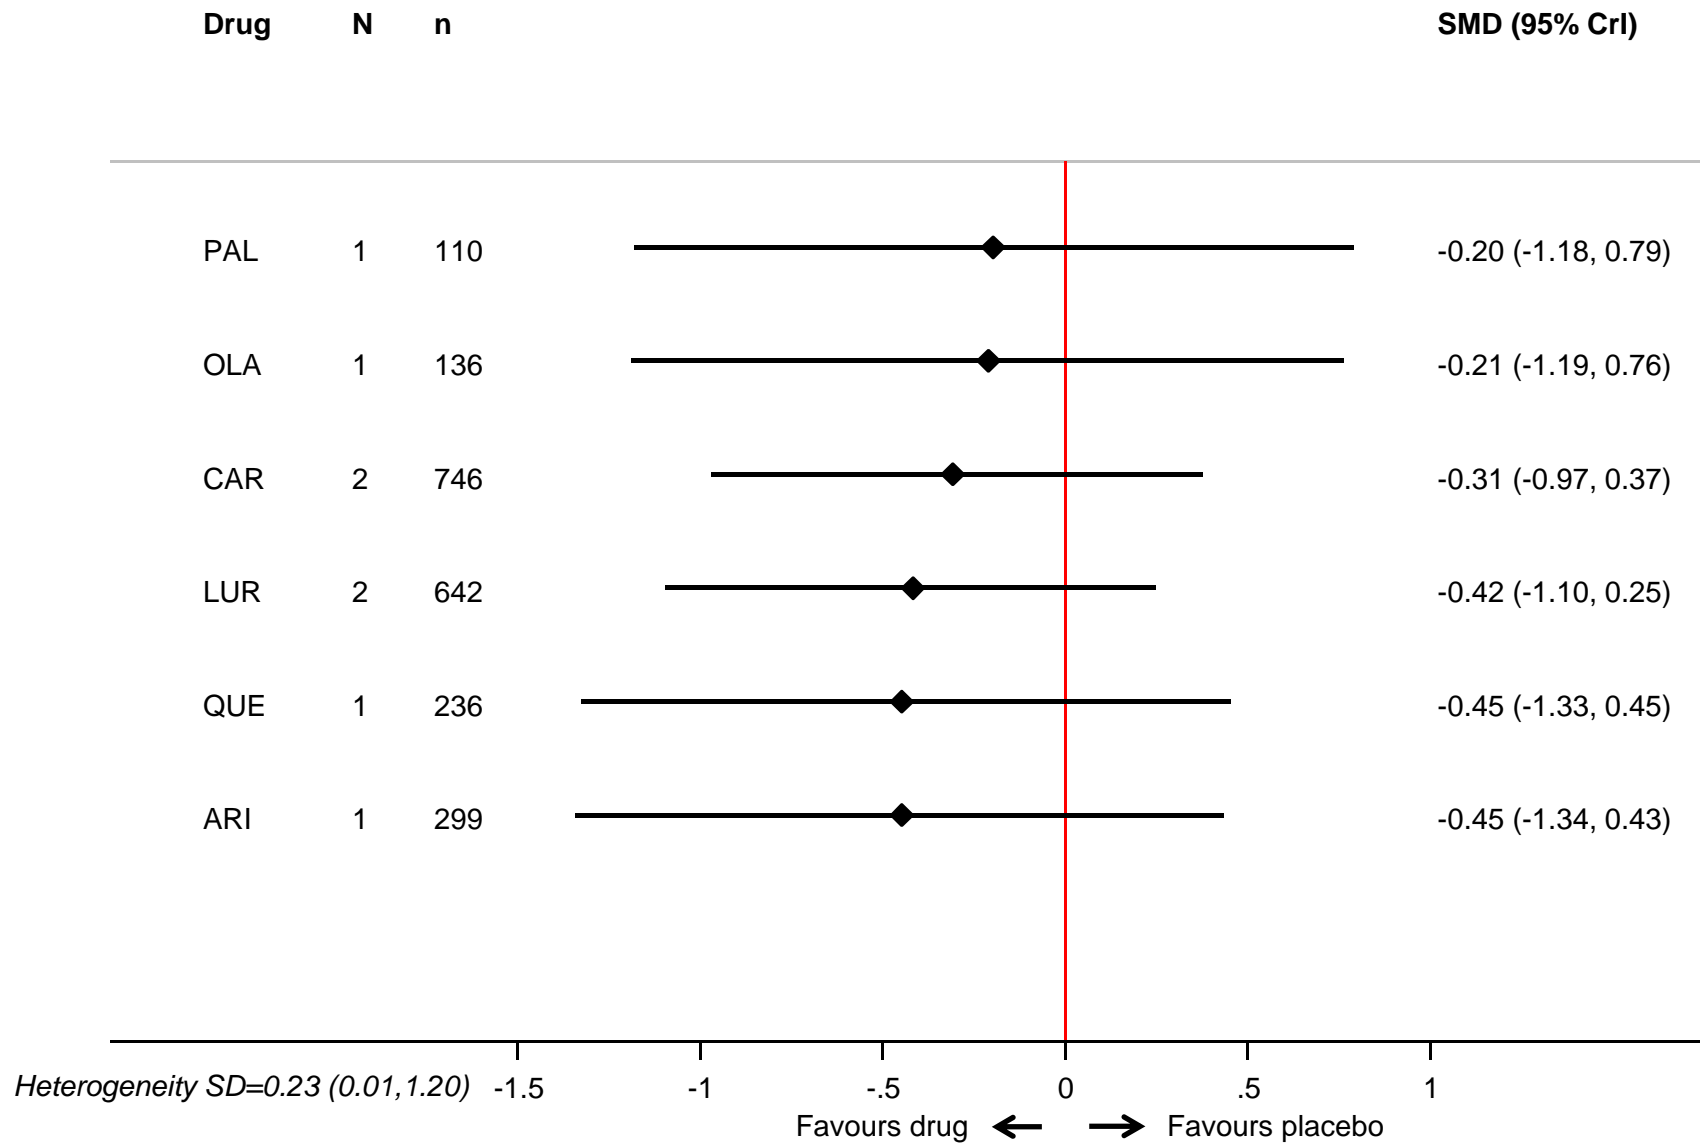



# Social functioning

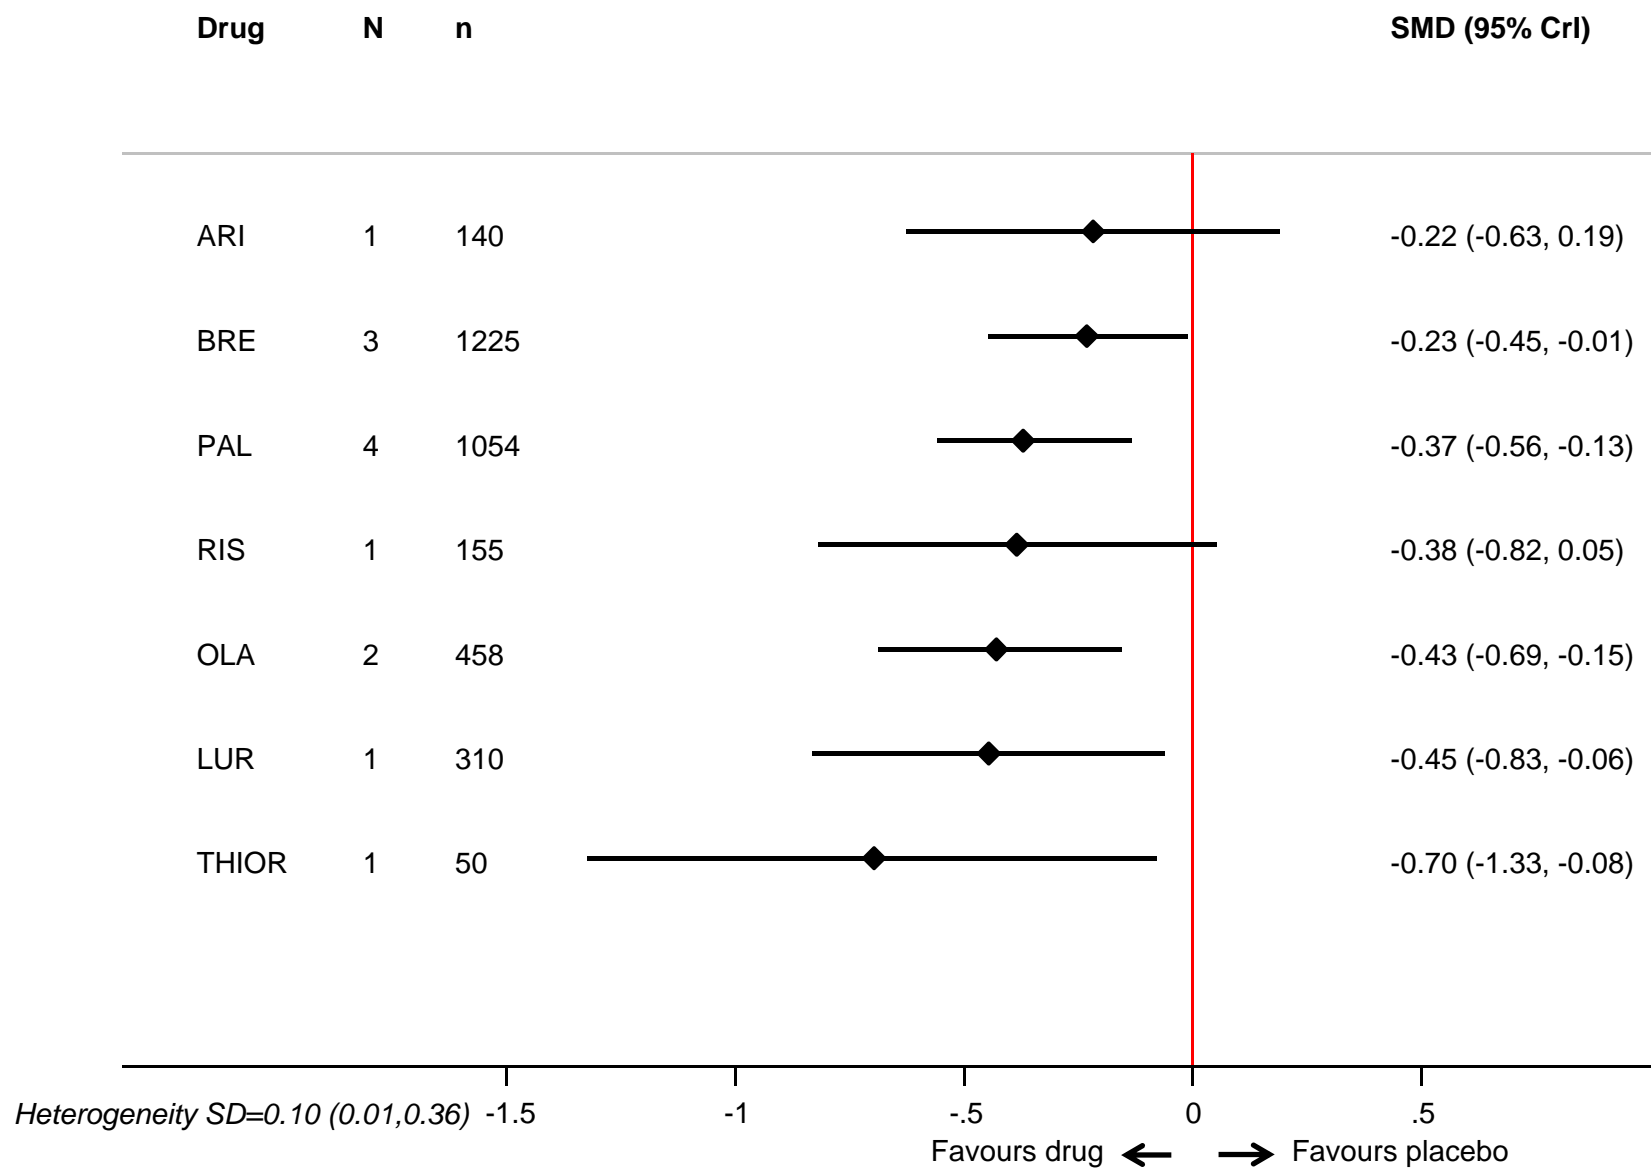

# Sedation

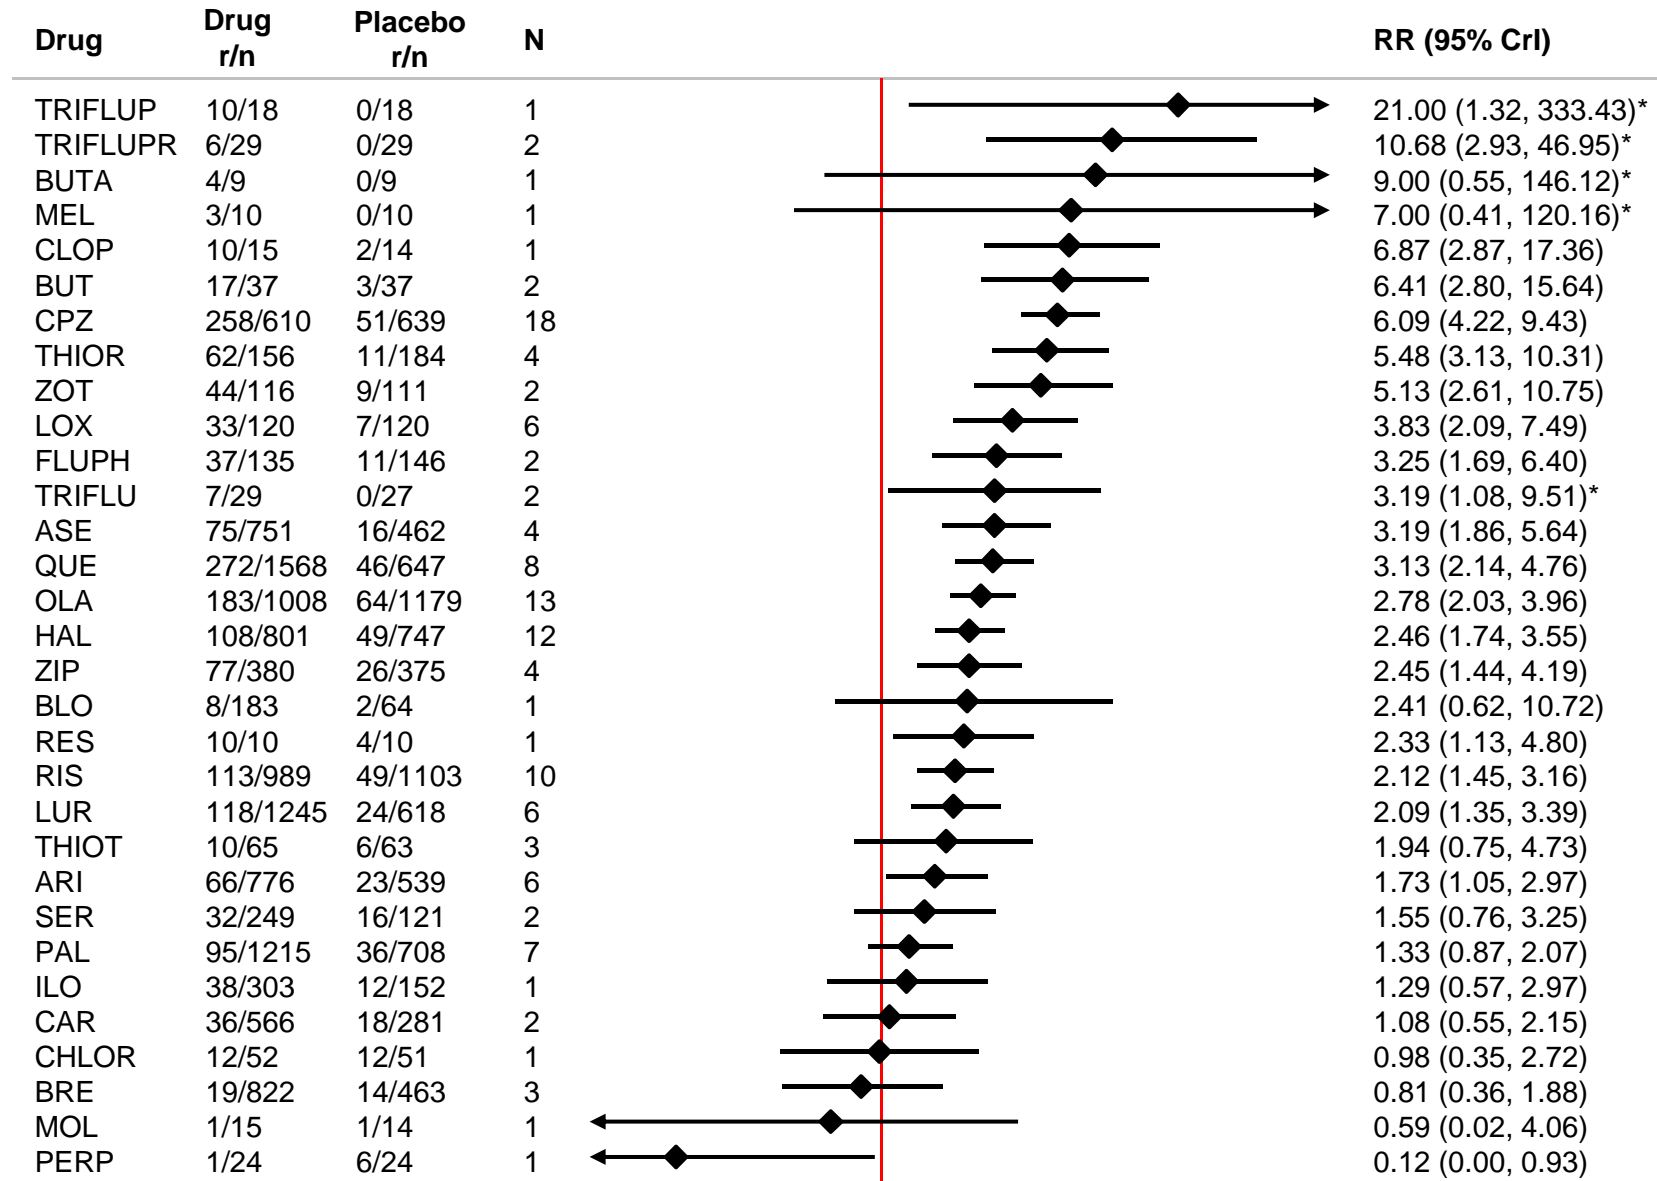

Heterogeneity  $SD=0.35$  (0.12,0.56)

.05 .2 1 5 25 100

Favours drug ← → Favours placebo

Abbreviations: N = number of trials, n = number of participants, r = number of participants with an event, RR = relative risk, SMD = standardized mean difference, SD = standard deviation, CrI = credible interval, ARI = aripiprazole, ASE = asenapine, BLO = blonanserine, BRE = brexpiprazole, BUTA = butaperazine, CAR = cariprazine, CHLOR = chlorprothixene, CLOP = clopenthixol, CPZ = chlorpromazine, FLUPE = flupenthixol, FLUPH = fluphenazine, HAL = haloperidol, ILO = iloperidone, LOX = loxapine, LUR = lurasidone, MEL = melperone, MOL = molindone, OLA = olanzapine, PAL = paliperidone, PERP = perphenazine, PIP = pipothiazine, QUE = quetiapine, RES = reserpine, RIS = risperidone, SER = sertindole, THIOT = thiothixene, THIOR = thioridazine, TIOS = tiospirone, TRIFLU = trifluperazine, TRIFLUP = trifluperidol, TRIFLUPR = triflupromazine, ZIP = ziprasidone, ZOT = zotepine

\* These relative risks were obtained after a continuity correction and from a fixed effect model.

## **Supplementary Figure S3**

**Results of the individual studies in the various  
outcomes**

# Overall efficacy

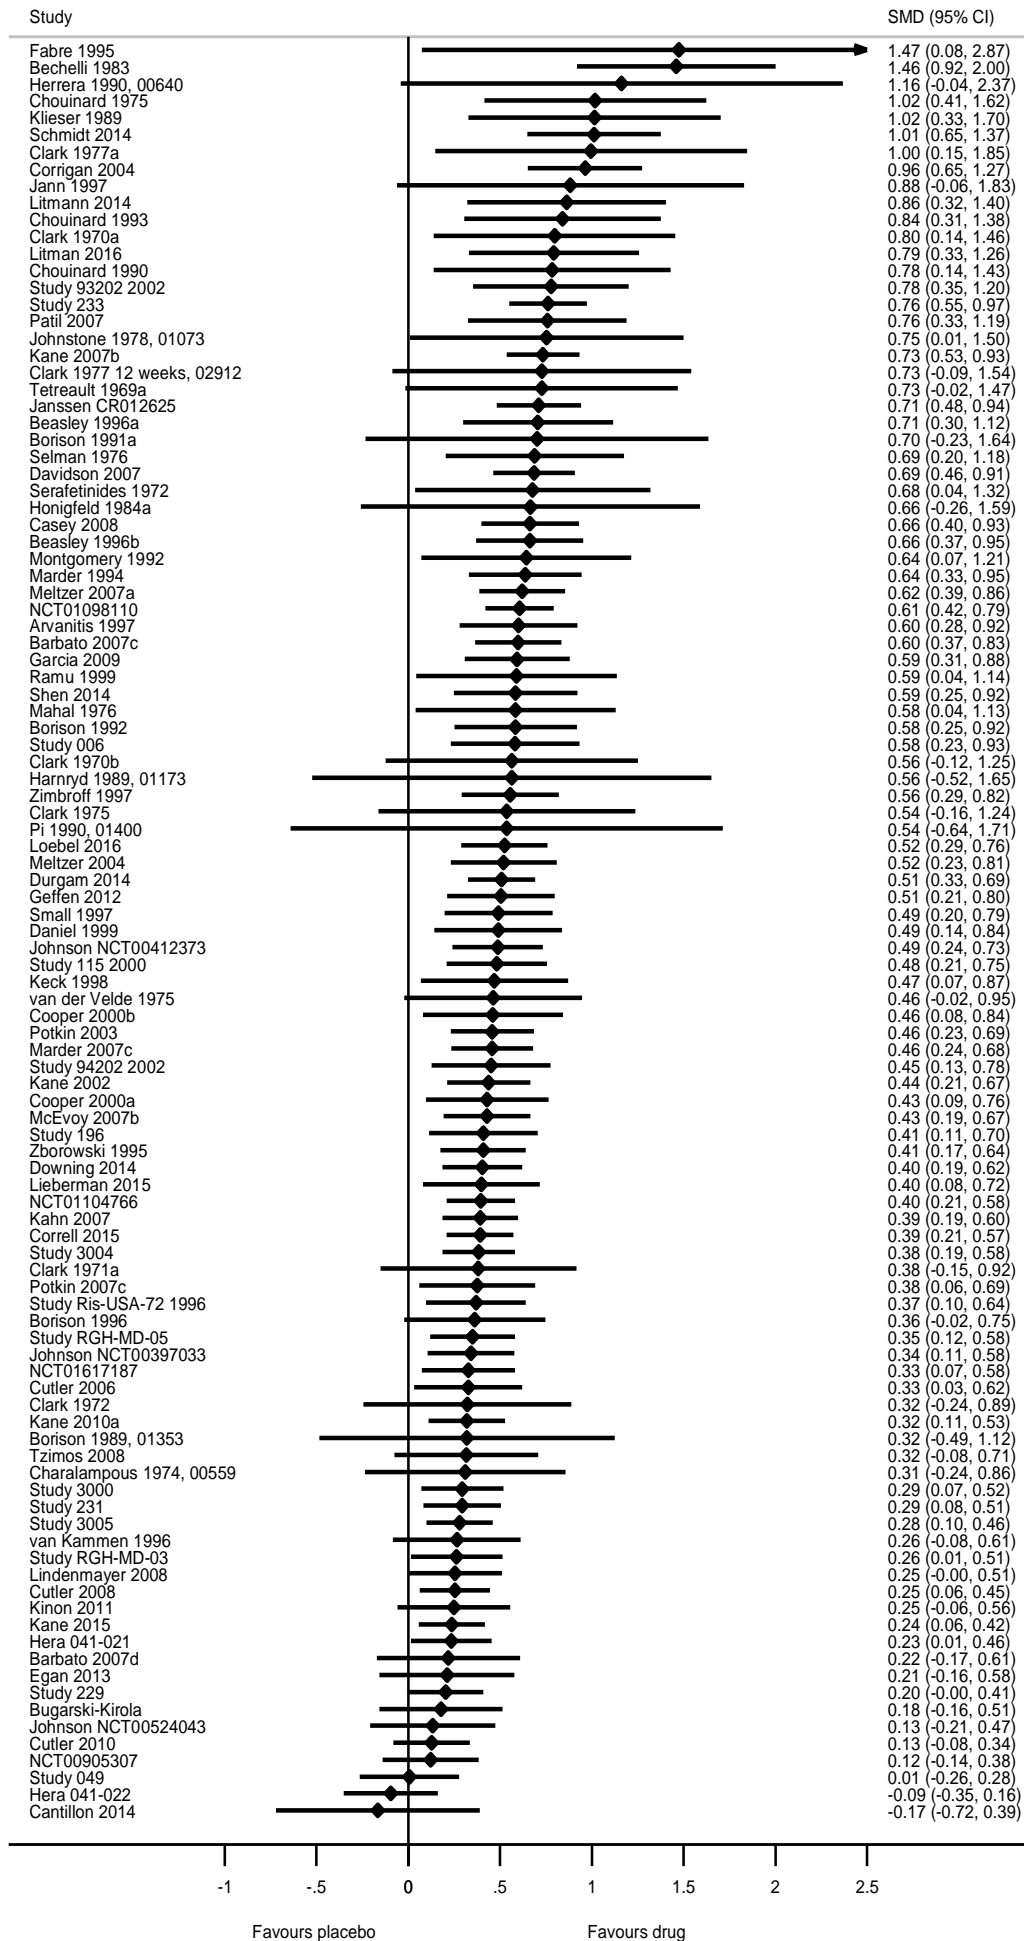

# Response

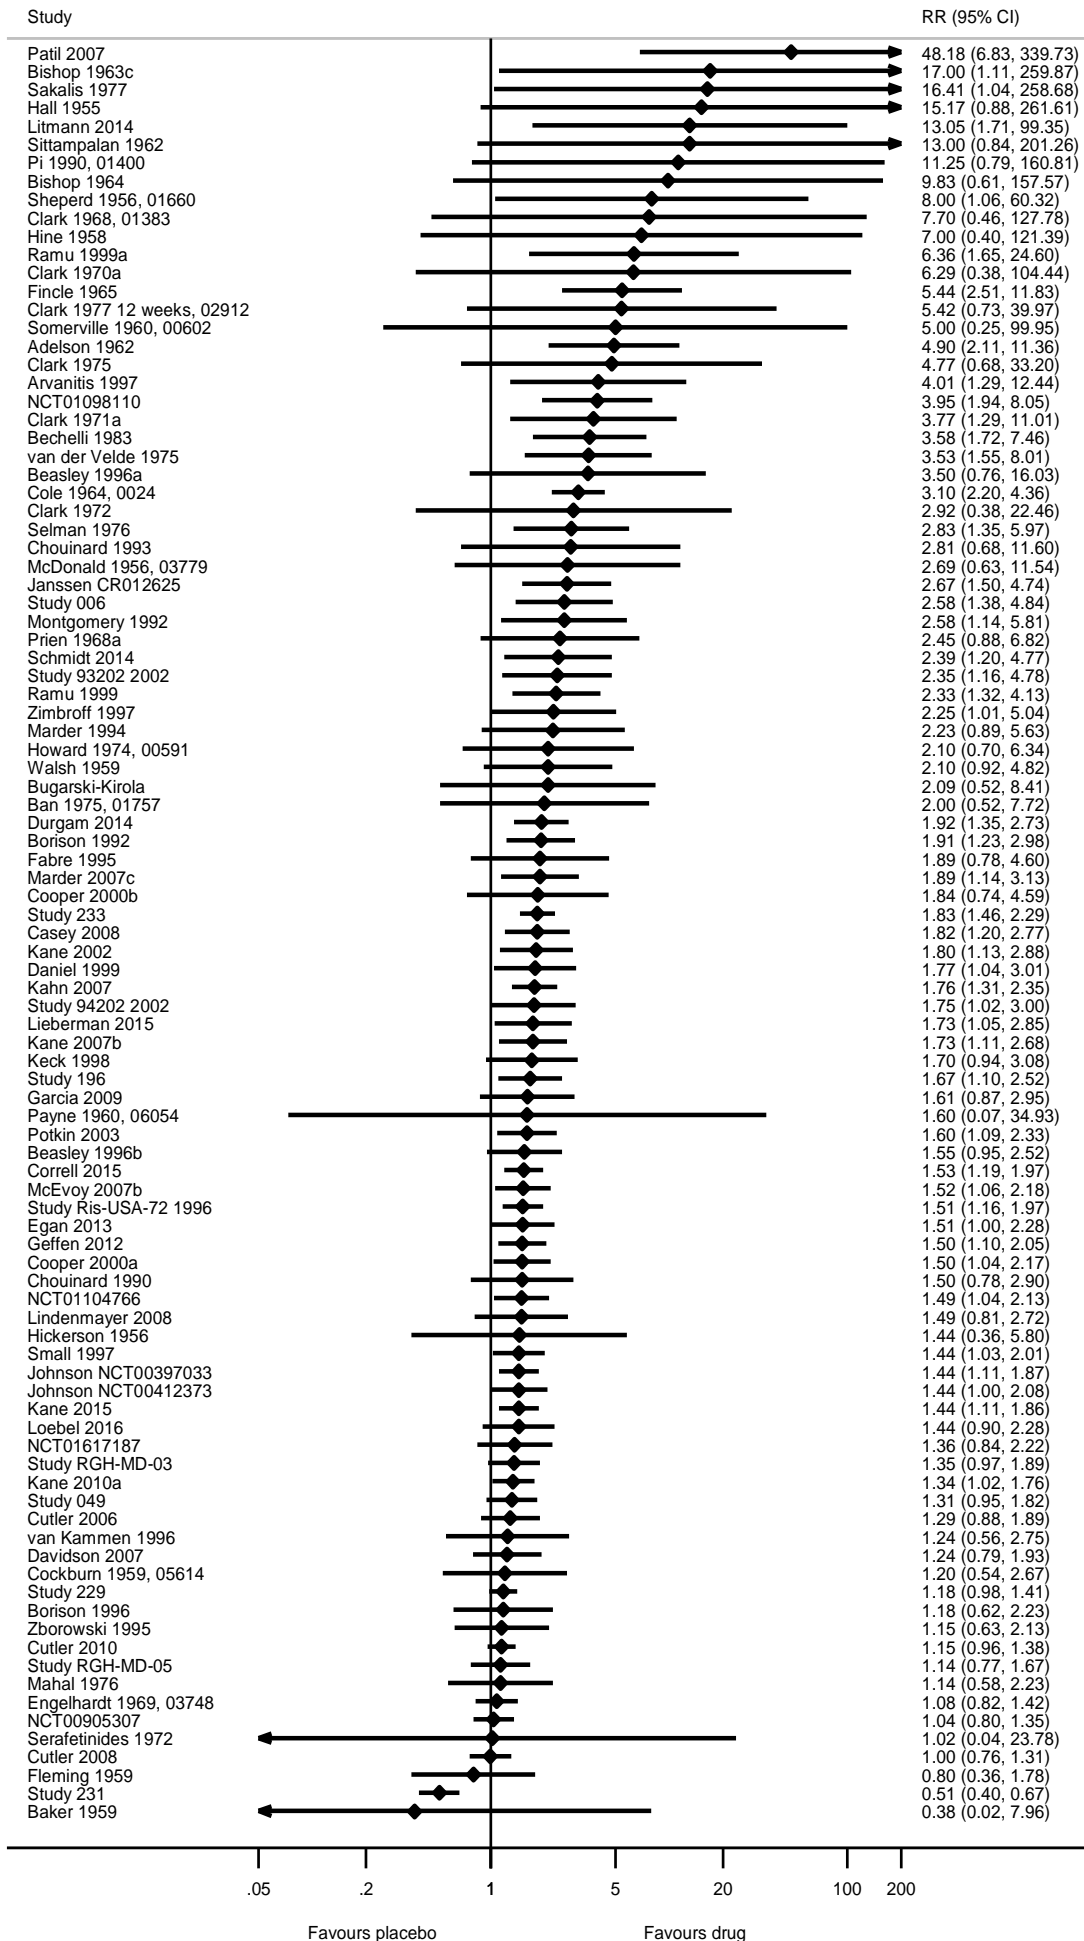

# Dropouts (any reason)

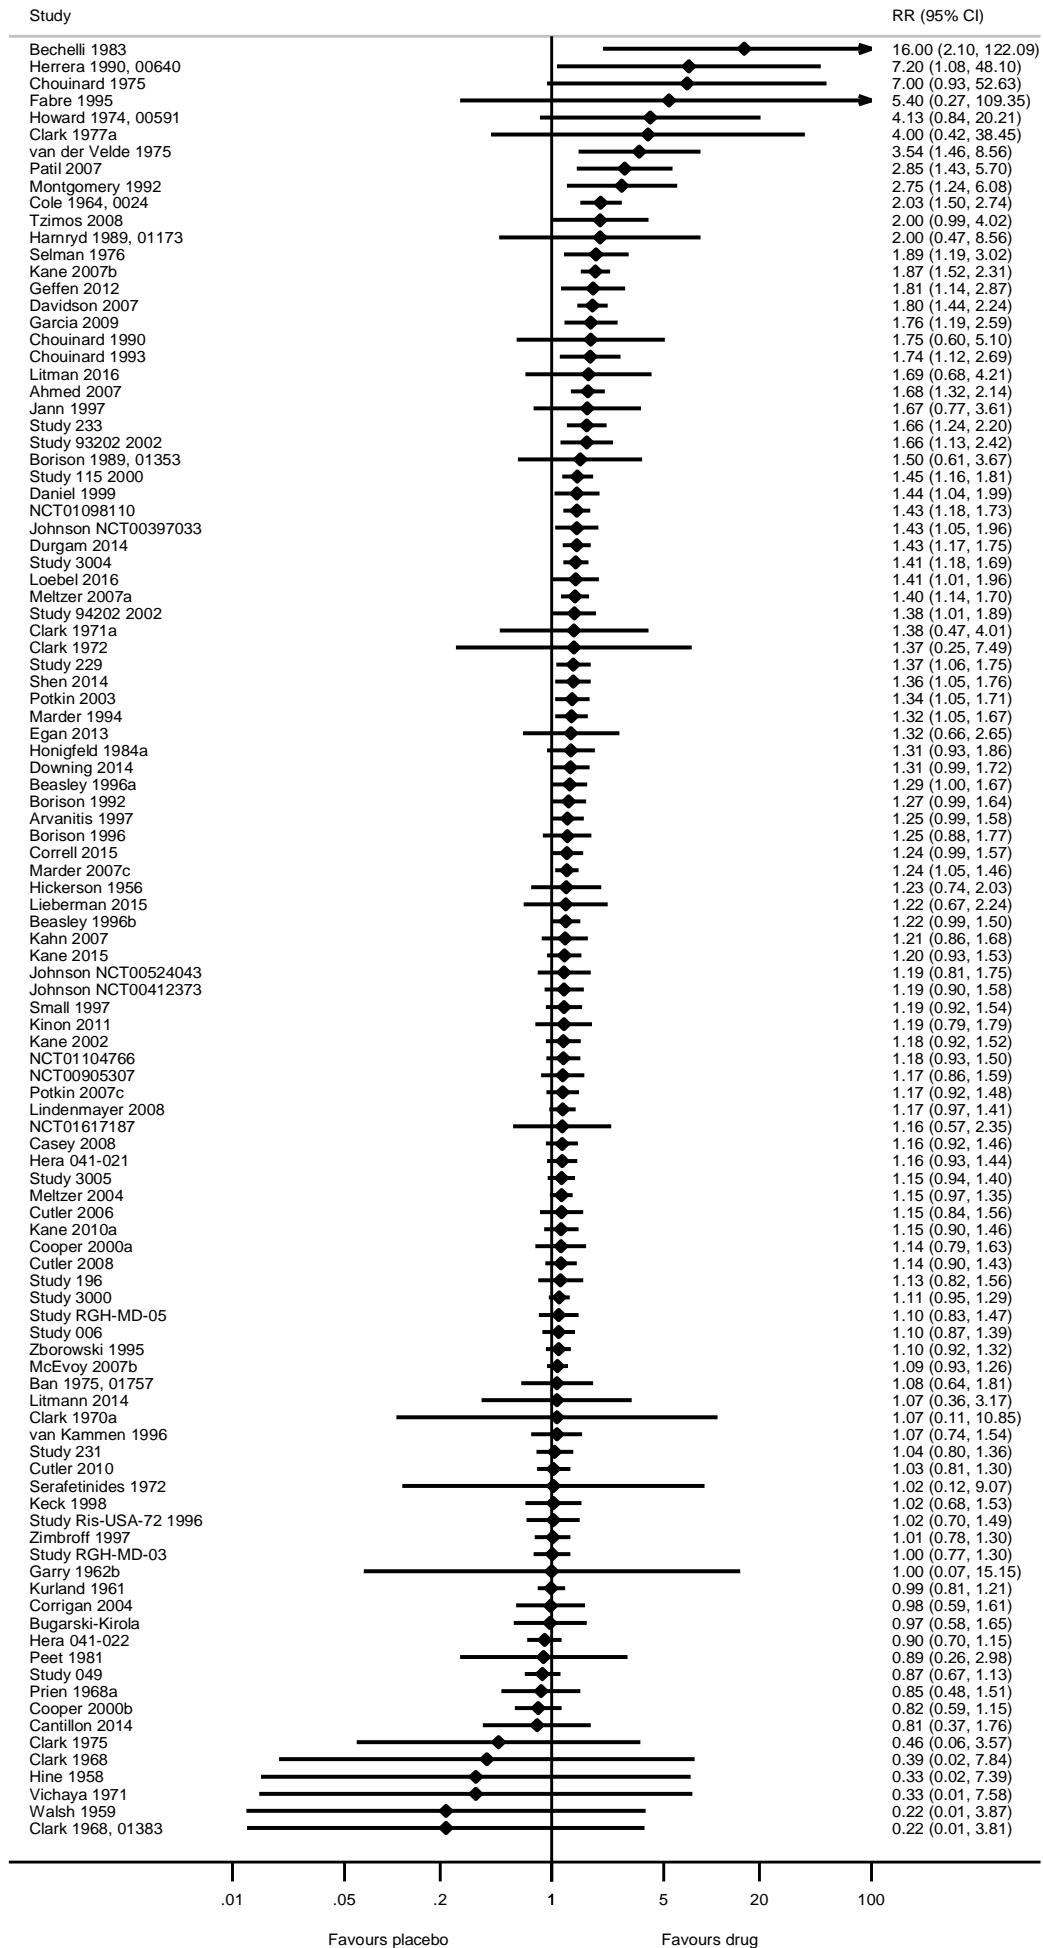

# Dropouts (inefficacy)

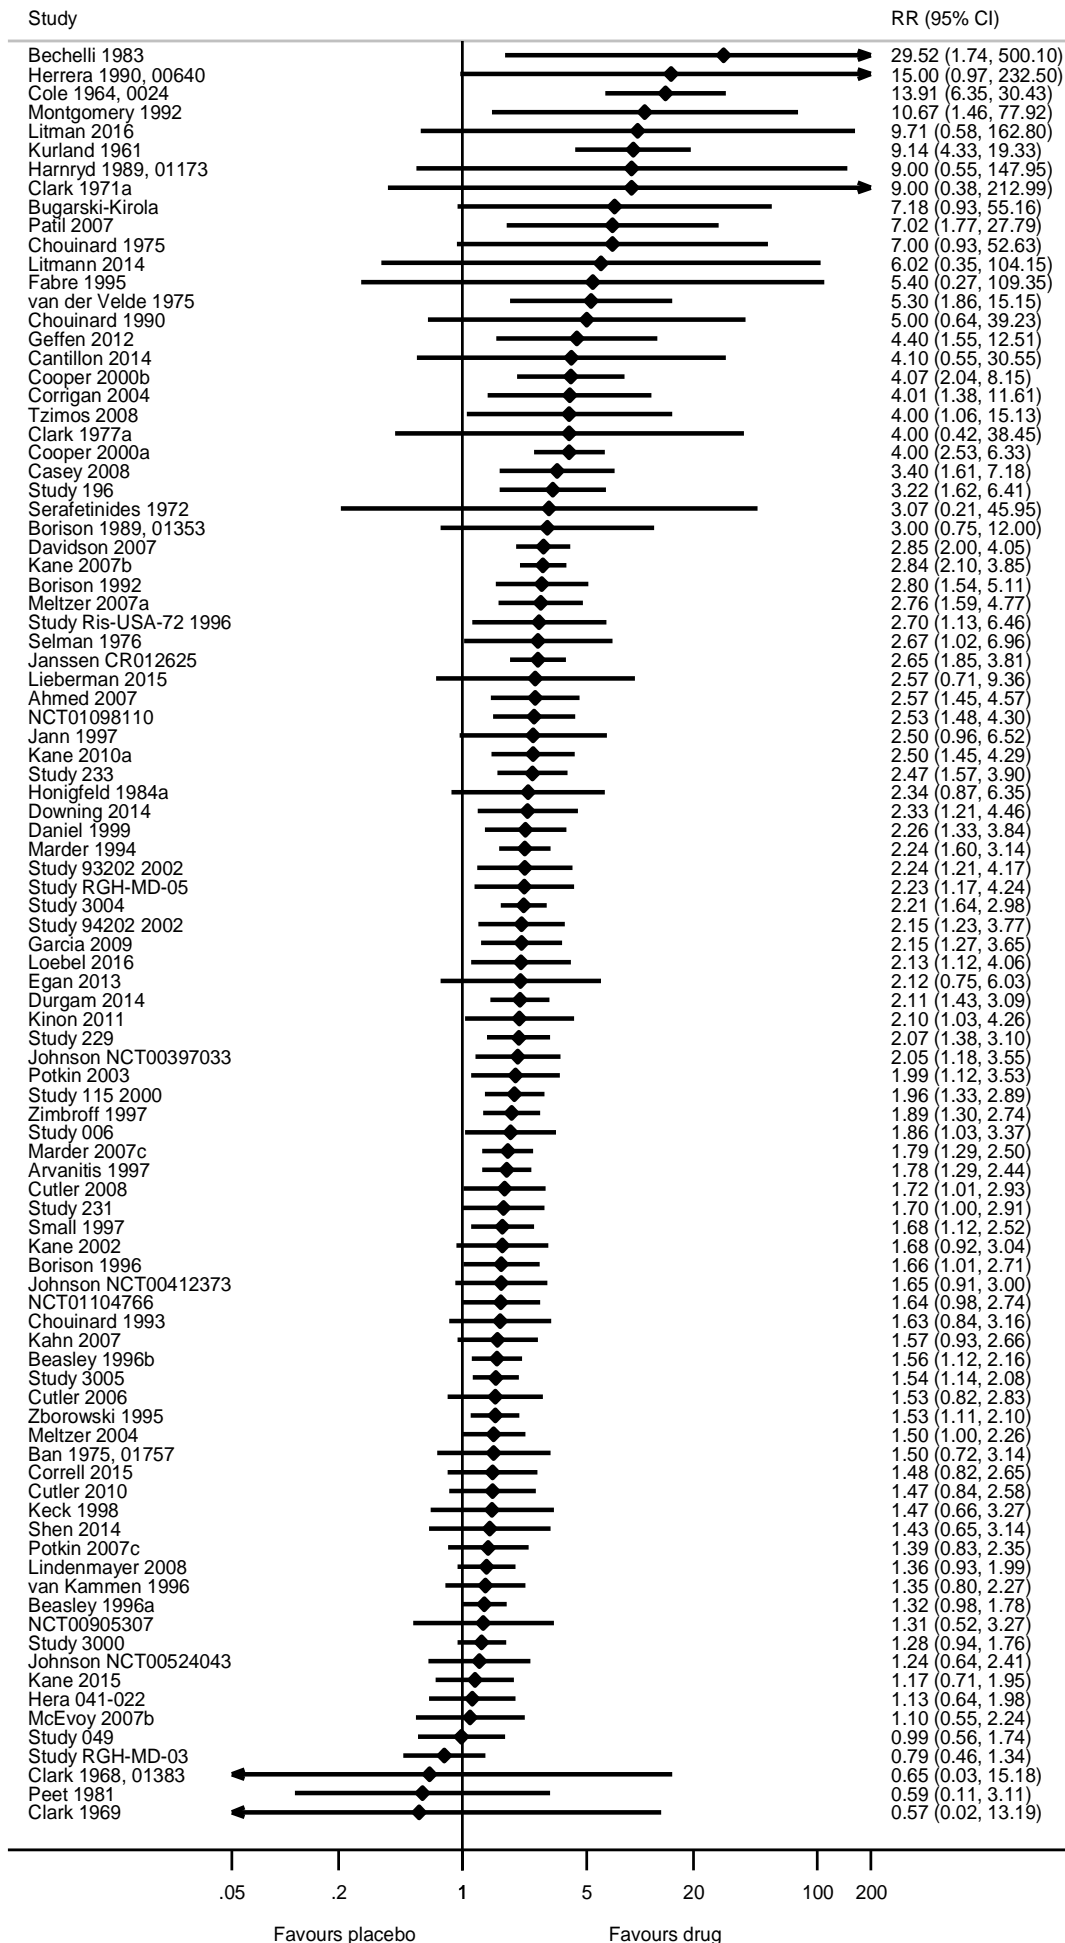



# Positive symptoms

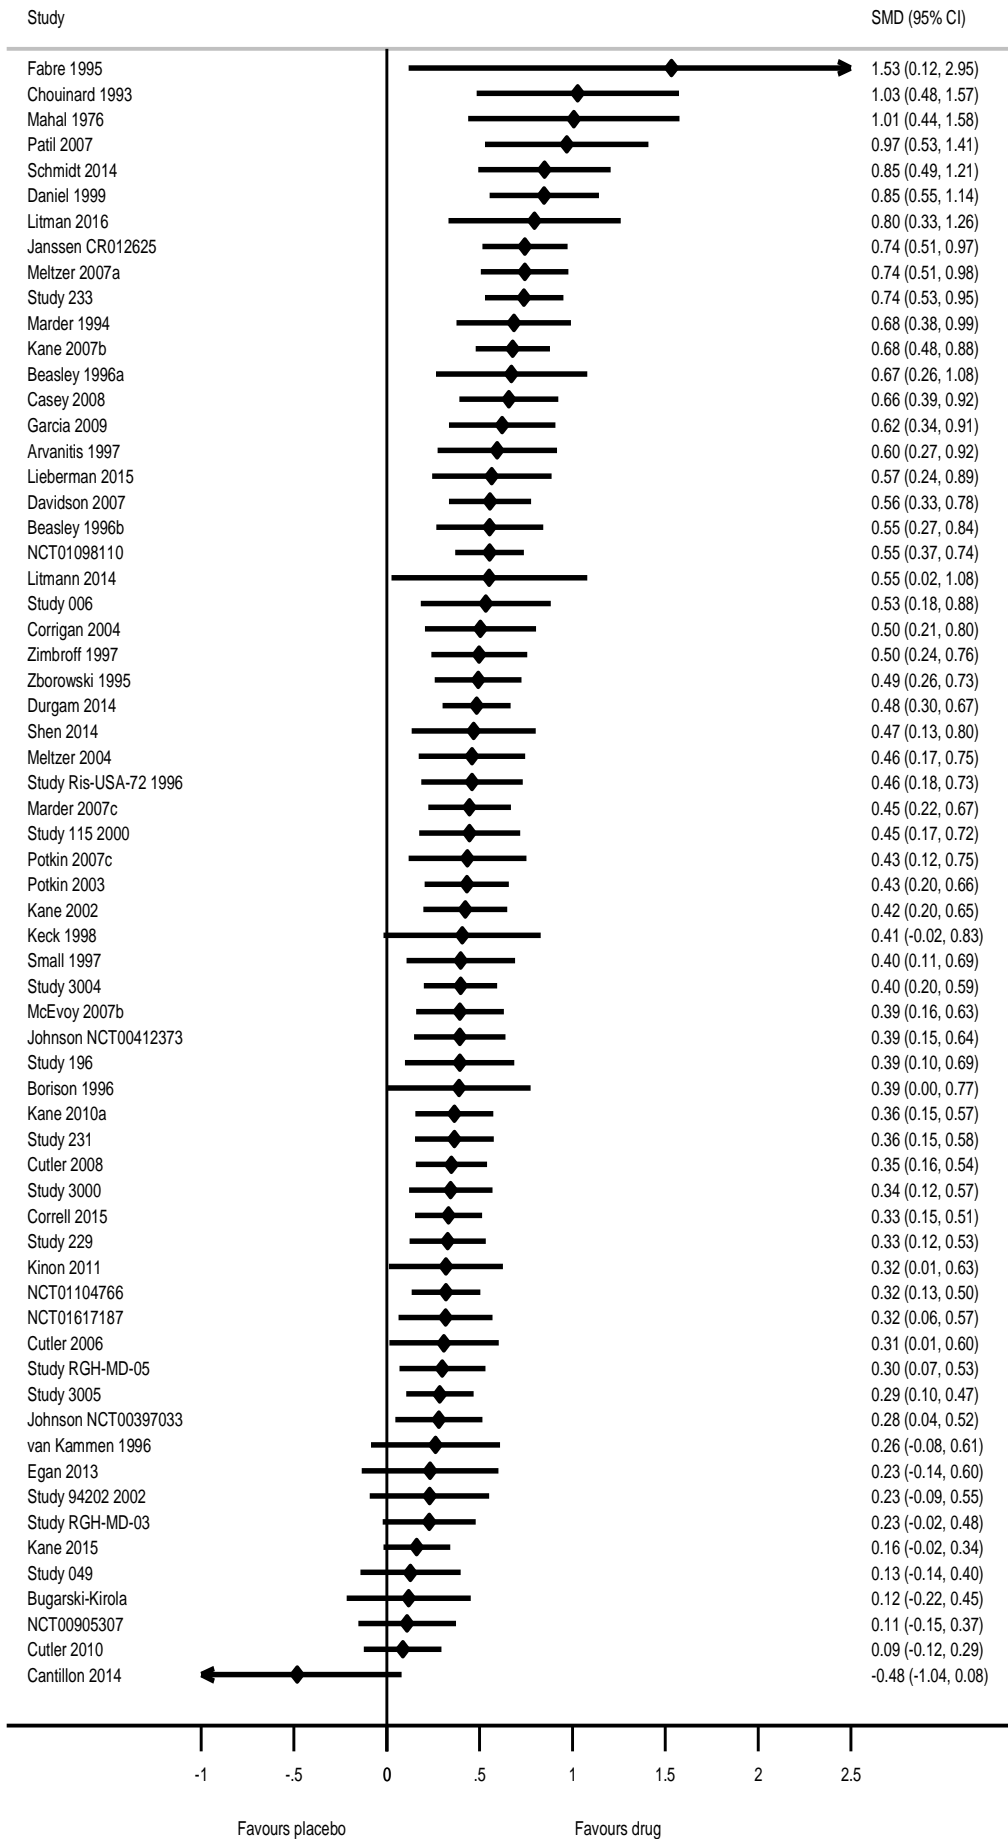

# Negative symptoms

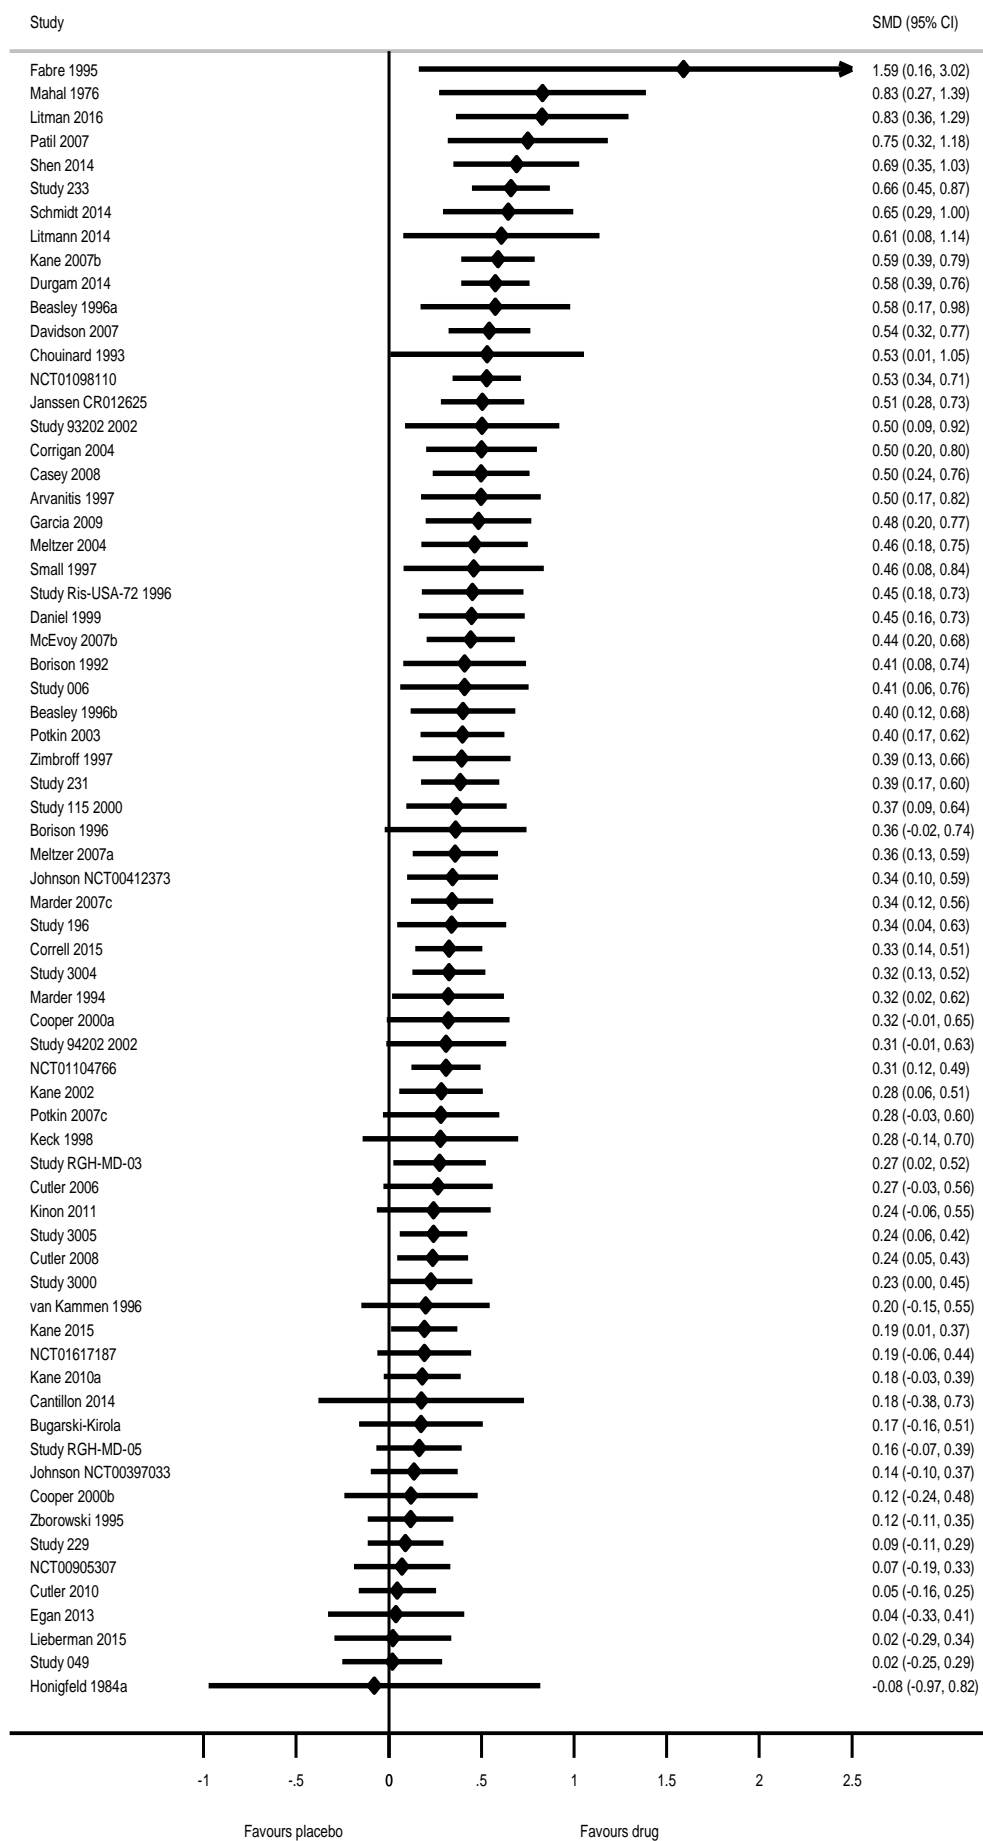

# Depressive symptoms

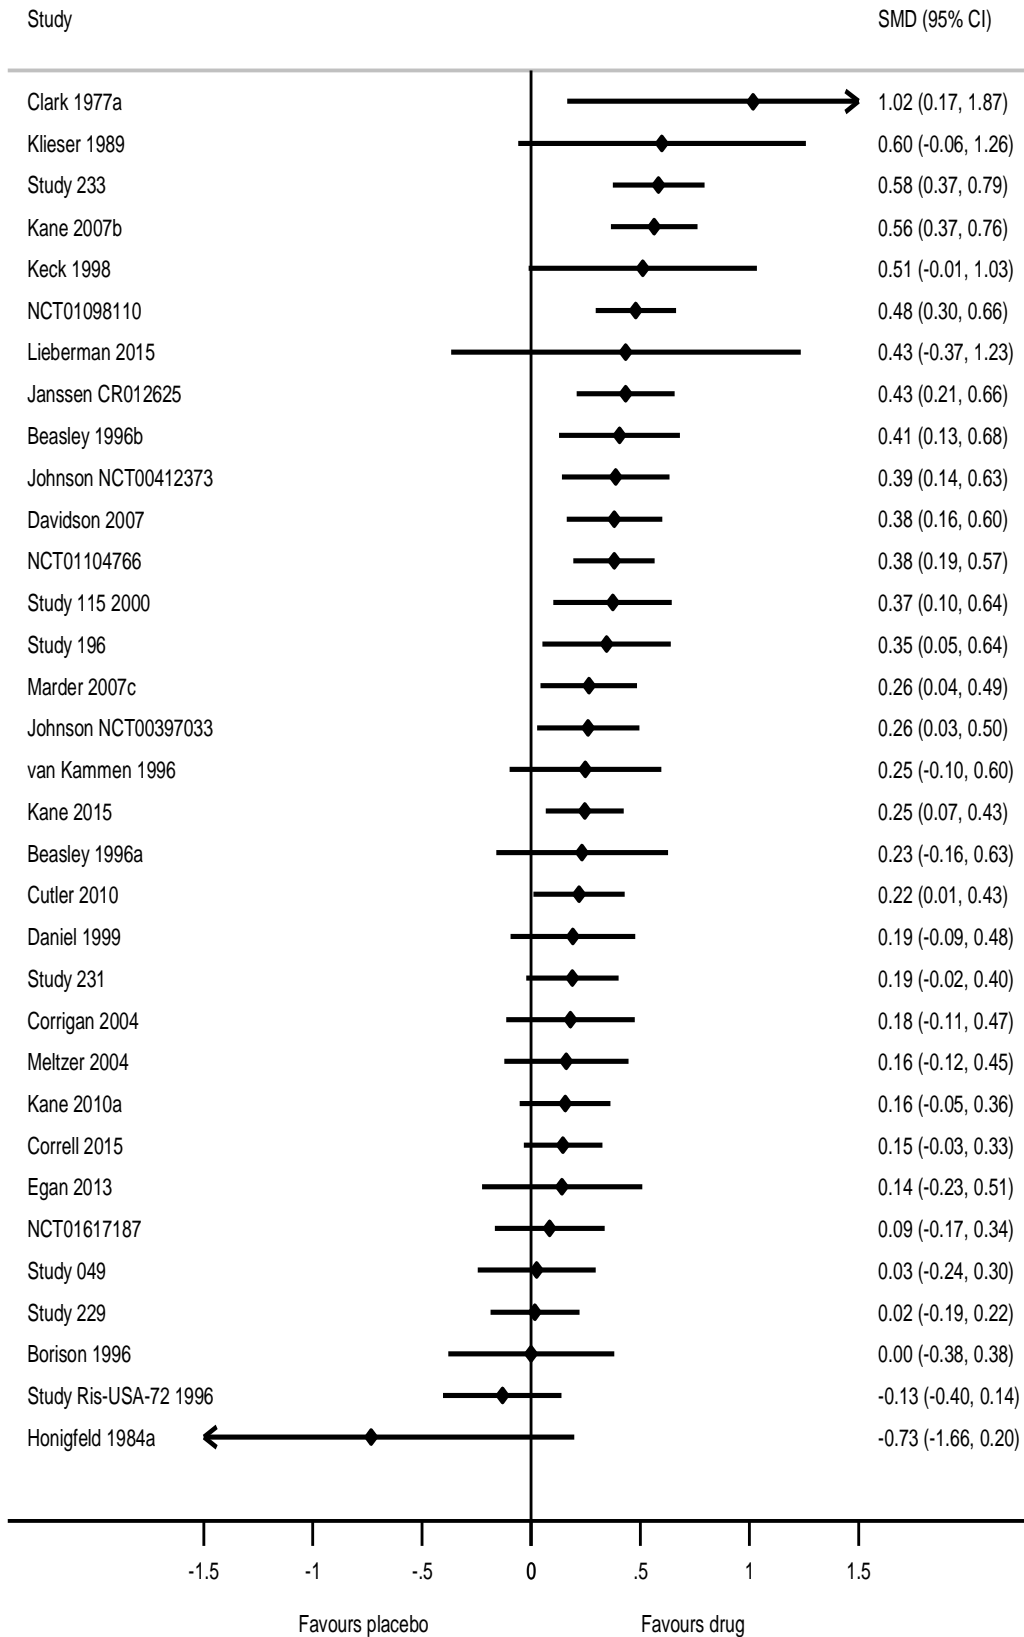

# Weight gain

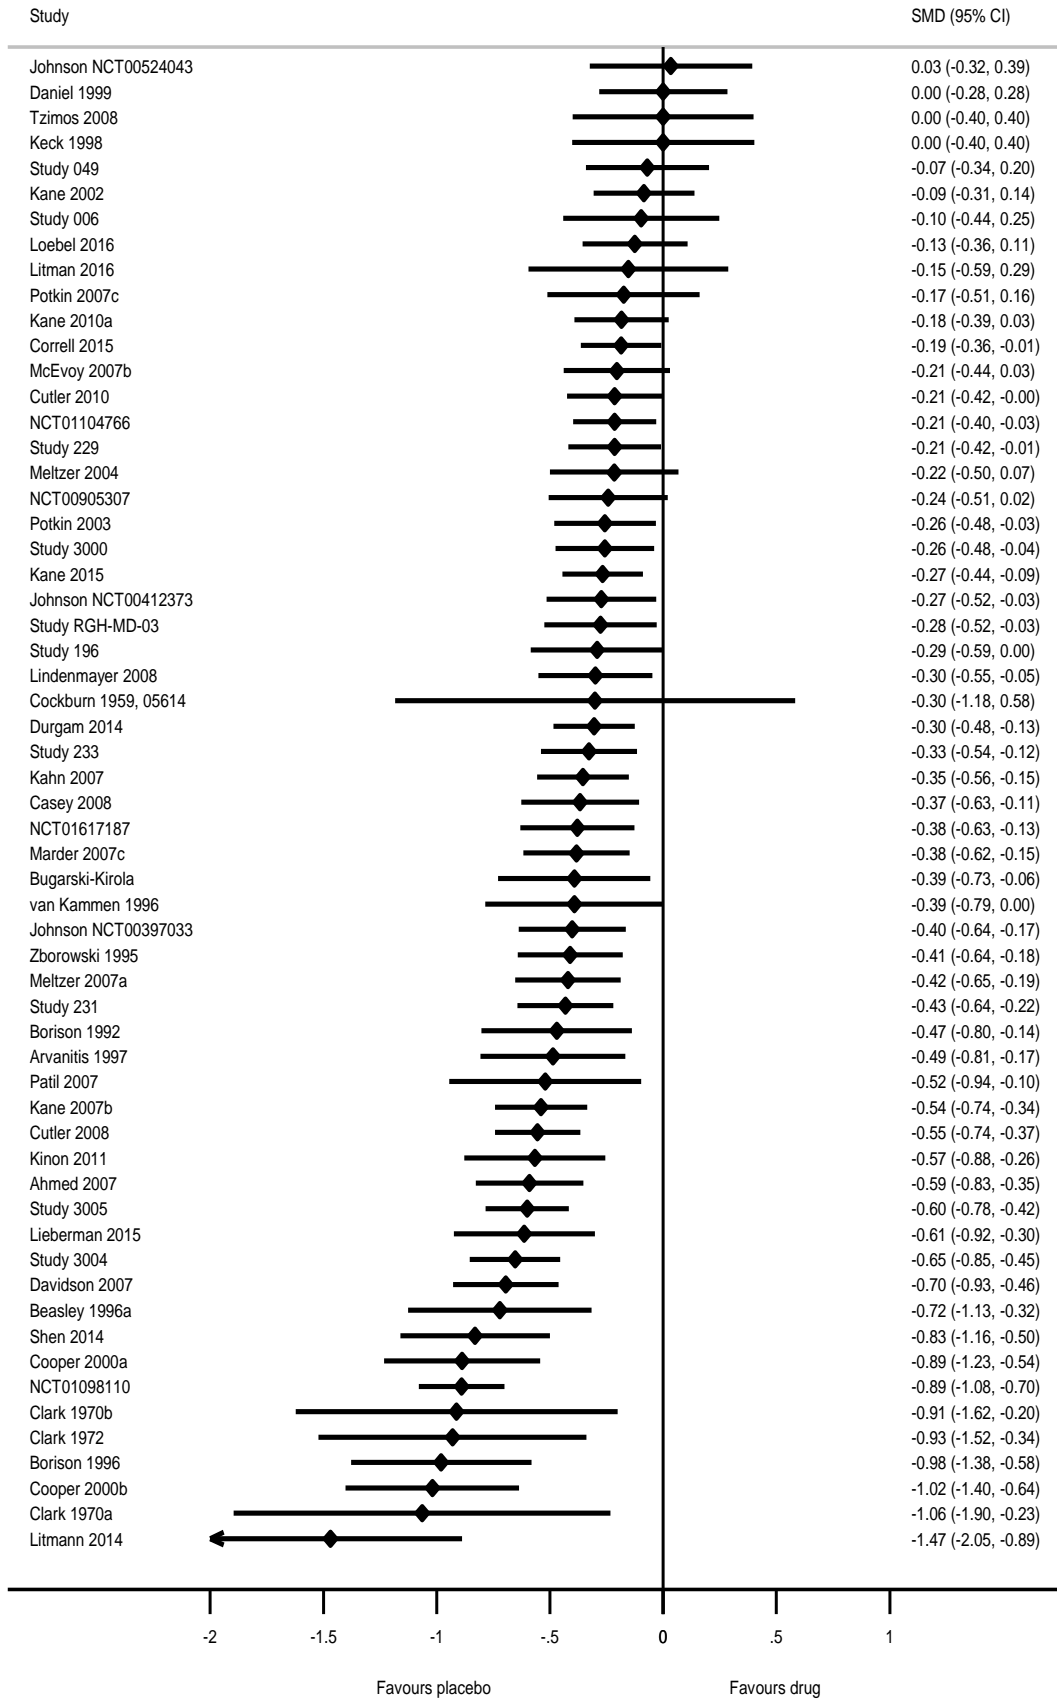

# Quality of life

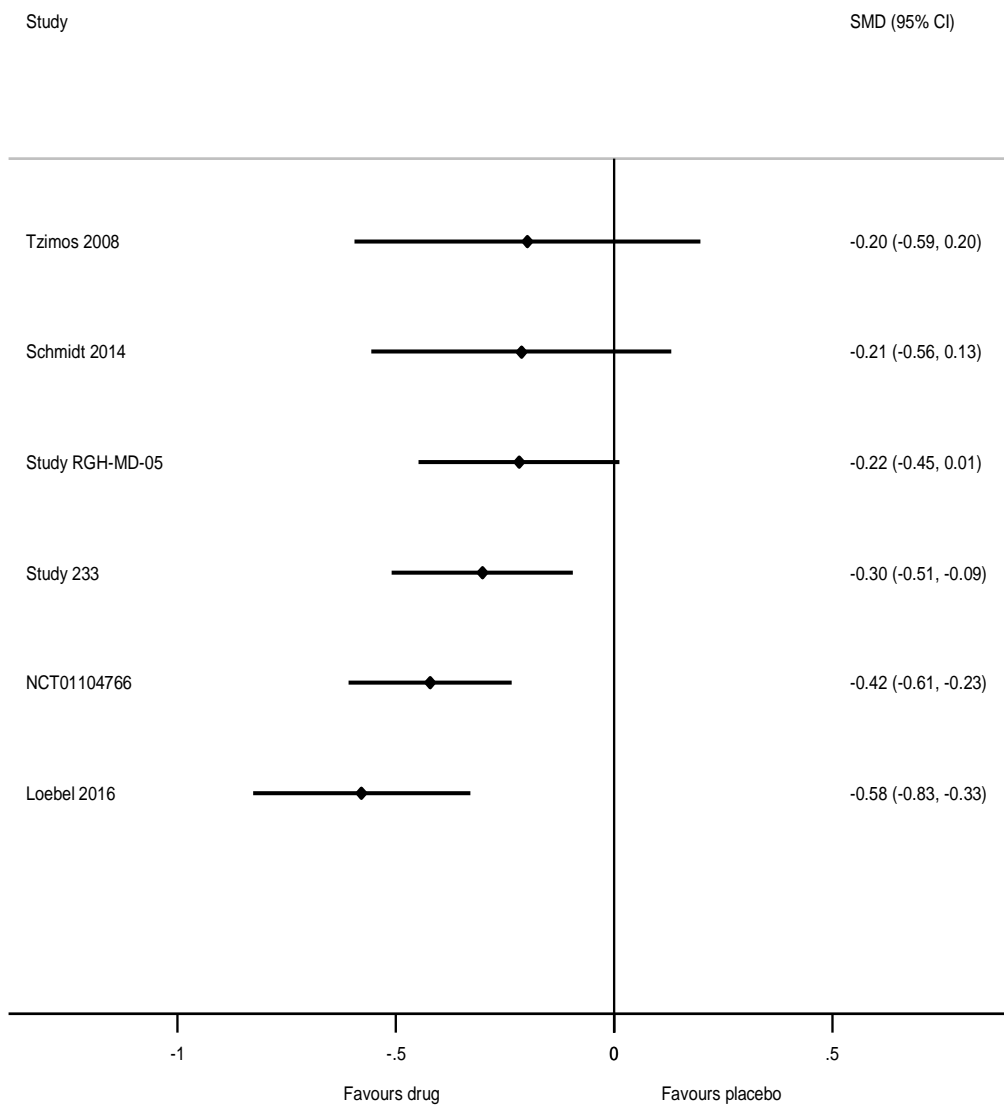

# Social functioning

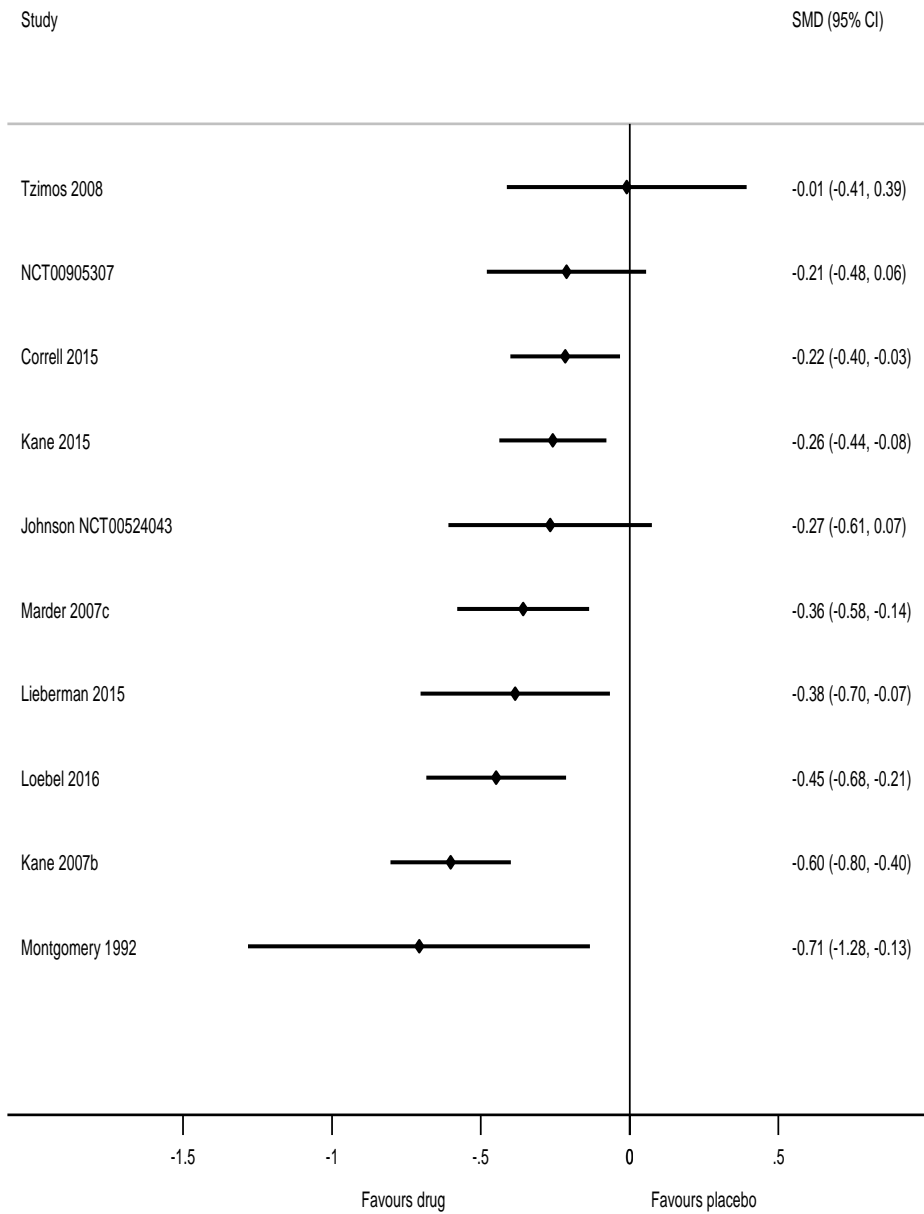

# Antiparkinson medication

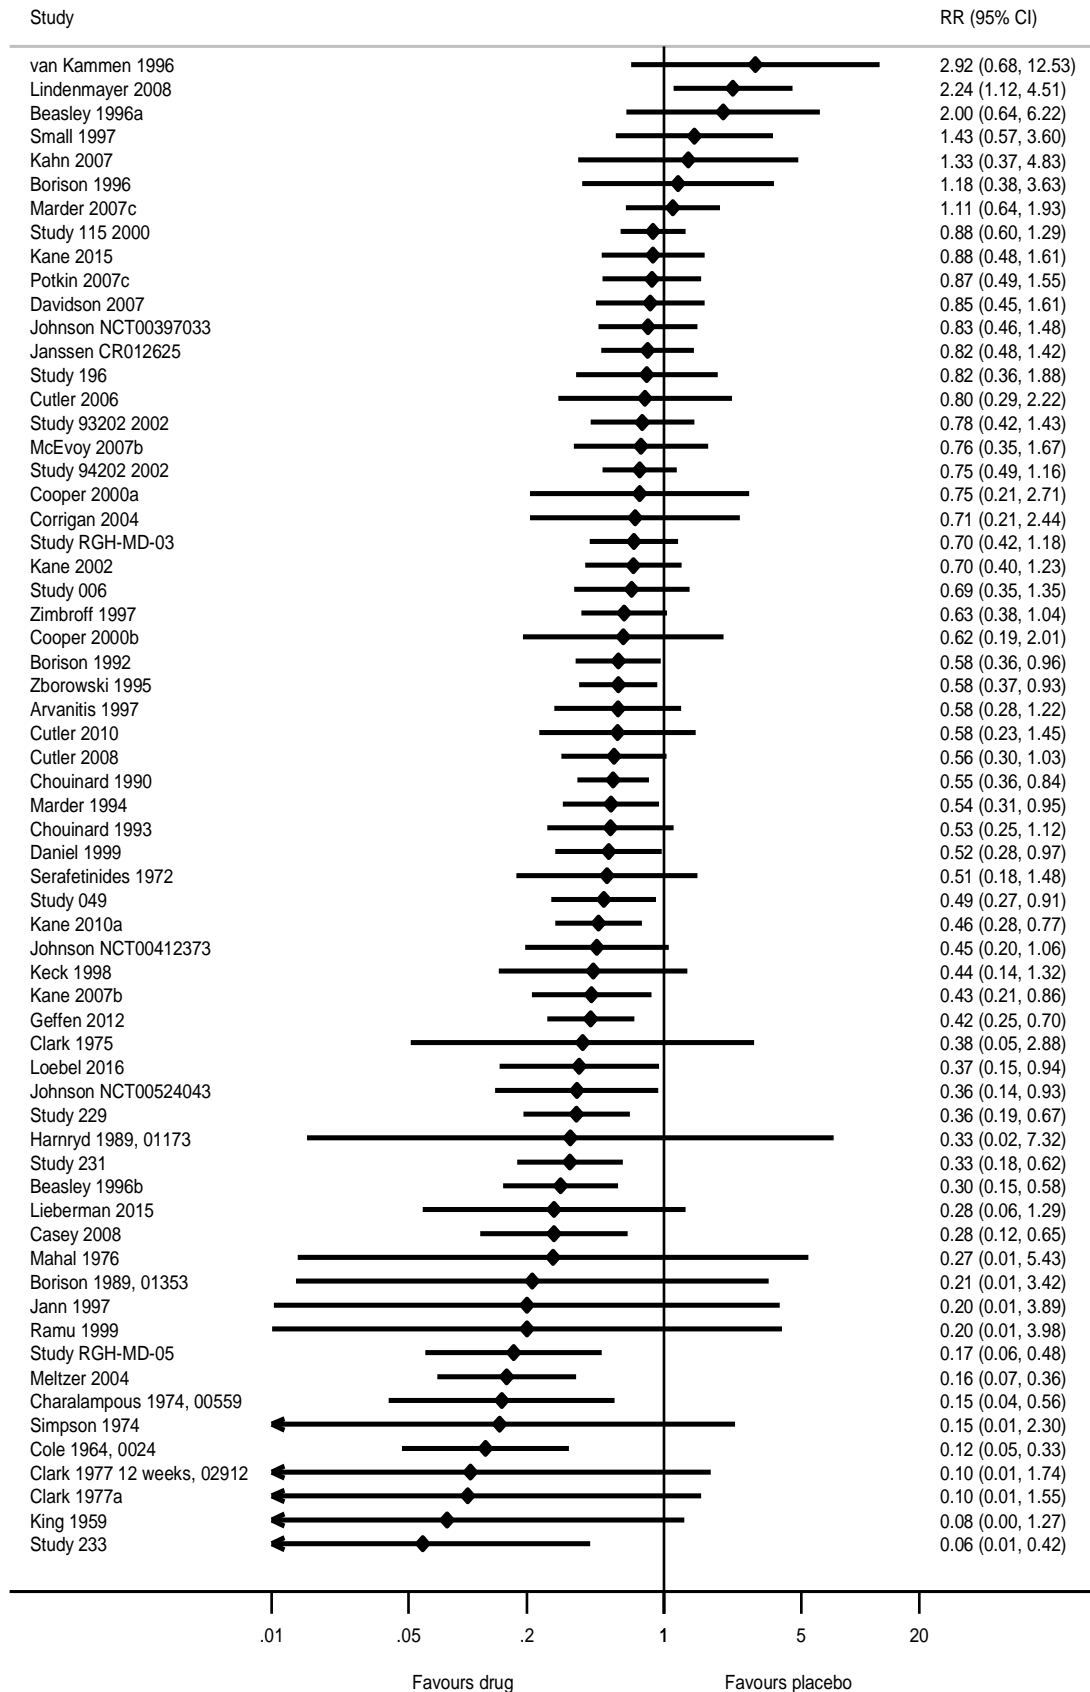

# Depression

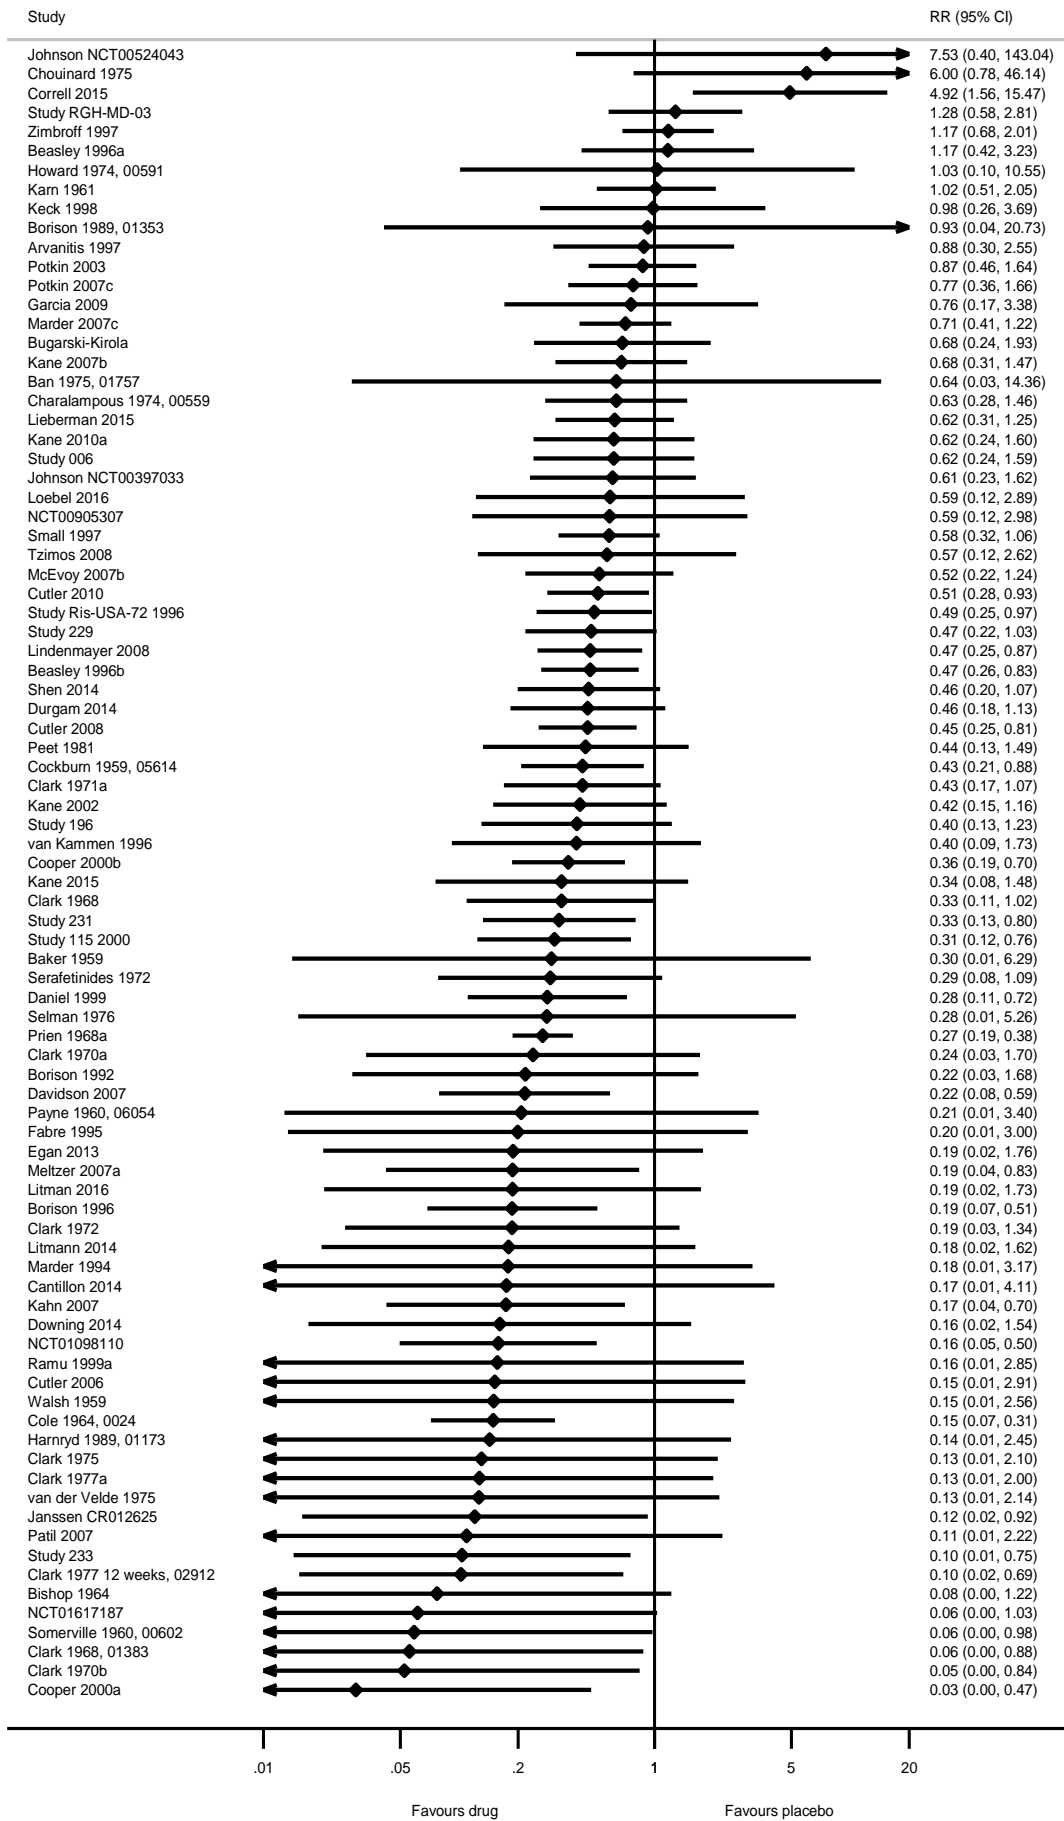



# Prolactin increase

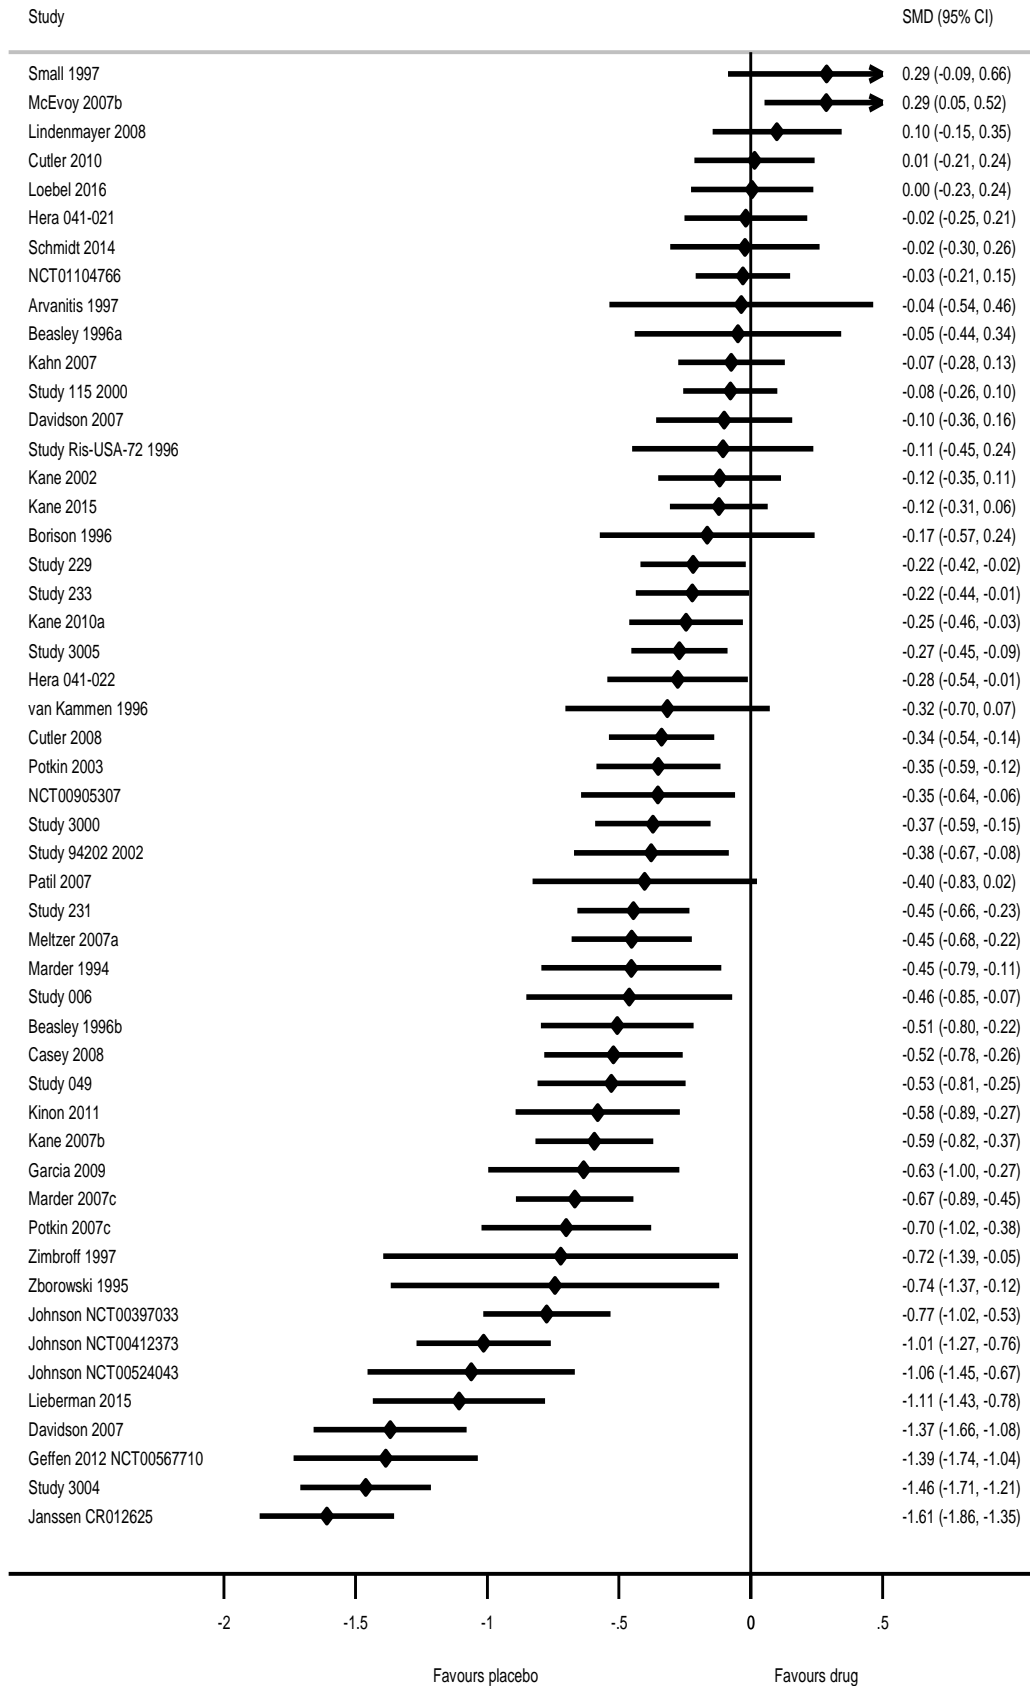

# QTc prolongation

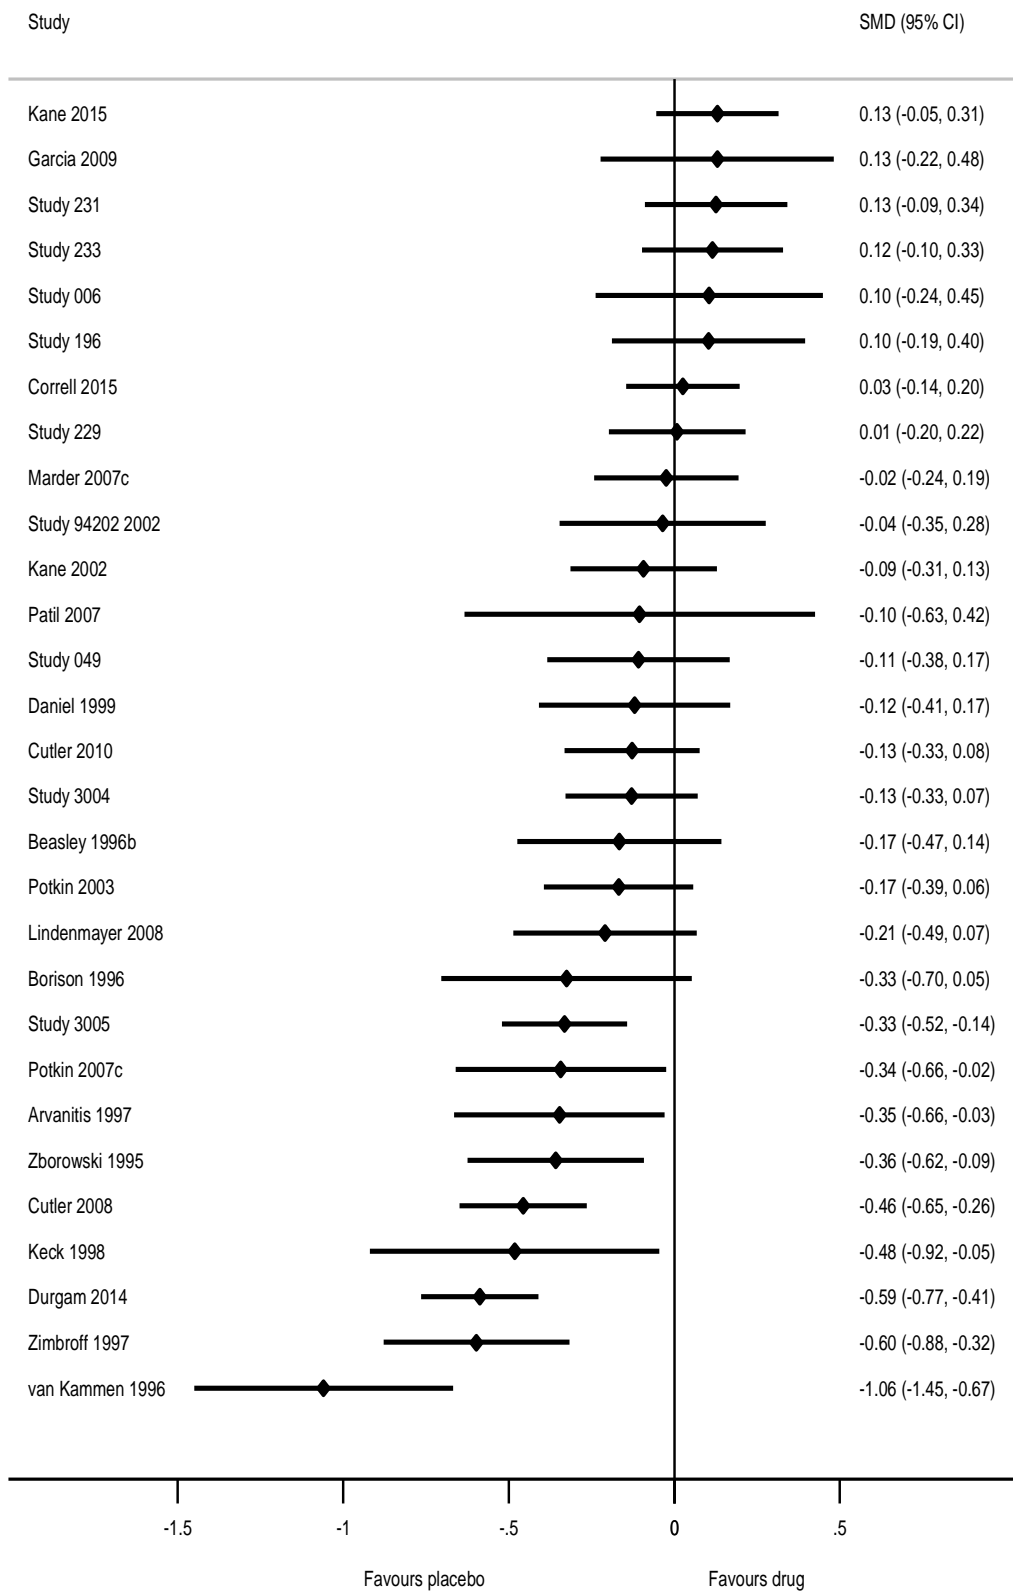

## **Supplementary Table S7**

**Multivariable meta-regression sensitivity analyses including all  
moderators that were significant in univariate analyses and  
excluding pharmaceutical sponsorship**

Meta-regression model combining all moderators that were significant in univariate analyses

|                                                   | <b>Coefficient (95% CrI)</b> | <b>Interpretation</b>                                                                                                                                                          | <b>Probability*</b> |
|---------------------------------------------------|------------------------------|--------------------------------------------------------------------------------------------------------------------------------------------------------------------------------|---------------------|
| <b>Placebo response</b><br>[10-unit increase]     | -0.11<br>(-0.20,-0.02)       | A 10 PANSS points higher mean change score in the placebo arm would reduce the SMD on average by 0.11 units                                                                    | 94.2%               |
| <b>Industry sponsored or not</b>                  | -0.20<br>(-0.37,-0.02)       | The SMD for studies including at least one sponsored drug would be on average 0.20 units smaller than non-sponsored studies                                                    | 78.4%               |
| <b>Publication year</b><br>[ten-year increase]    | -0.06<br>(-0.17,0.05)        | A 10 years later published study would have an on average 0.06 units smaller SMD                                                                                               | 28.8%               |
| <b>Sample size</b><br>[100 participants increase] | 0.00<br>(-0.04,0.04)         | A 100 participants larger study would have an on average the same SMD                                                                                                          | 9.3%                |
| <b>Number of sites</b><br>[10-site increase]      | 0.02<br>(-0.02,0.06)         | The SMD of a study with 10 more sites would be on average 0.02 units larger                                                                                                    | 18.0%               |
| <b>Mean dose</b><br>[100 CPZ units increase]      | 0.01<br>(-0.02,0.05)         | A 100 CPZ units higher mean dose would increase the SMD on average by 0.01 units                                                                                               | 9.3%                |
| <b>Number of medications</b>                      | 0.02<br>(-0.09,0.14)         | The SMD for a study with 1 more medication would be on average 0.02 units larger                                                                                               | 42.4%               |
| <b>Coefficient for operationalized or not</b>     | -0.02<br>(-0.46,0.42)        | The SMD for studies without operationalized criteria would be on average 0.02 units smaller than studies with operationalized                                                  | 35.8%               |
| <b>Baseline severity entry minimum score</b>      | -0.05<br>(-0.28,0.18)        | The SMD for studies having a minimum baseline severity entry score would on average 0.05 units smaller than that with studies without a minimum baseline severity entry score. | 36.8%               |
| <b>Scale</b>                                      | 0.01<br>(-0.23,0.22)         | The SMD of a study using BPRS would be on average 0.01 units larger compared to a study using PANSS                                                                            | 39.8%               |
| <b>Drug mechanism</b>                             |                              |                                                                                                                                                                                |                     |
| <b>M2 vs M1</b>                                   | -0.05<br>(-0.24,0.15)        | The SMD of a study with a drug of mechanism 2 would be on average 0.05 units smaller than of a study with a drug of mechanism 1                                                | 32.2%               |
| <b>M3 vs M1</b>                                   | -0.04<br>(-0.29,0.20)        | The SMD of a study with a drug of mechanism 3 would be on average 0.03 units smaller than of a study with a drug of mechanism 1                                                | 30.8%               |

|                                                                    |                       |                                                                                                                                 |       |
|--------------------------------------------------------------------|-----------------------|---------------------------------------------------------------------------------------------------------------------------------|-------|
| <b>M4 vs M1</b>                                                    | -0.06<br>(-0.28,0.17) | The SMD of a study with a drug of mechanism 4 would be on average 0.06 units smaller than of a study with a drug of mechanism 1 | 36.8% |
| <b>M5 vs M1</b>                                                    | -0.03<br>(-0.31,0.26) | The SMD of a study with a drug of mechanism 5 would be on average 0.03 units smaller than of a study with a drug of mechanism 1 | 40.5% |
| <b>Summary of the above model</b> (72 studies, 17710 participants) |                       |                                                                                                                                 |       |
| <b>Heterogeneity SD</b>                                            | 0.13 (0.08,0.18)      | 18.8% of the heterogeneity explained                                                                                            |       |

\*Probability that each moderator should be included in the model, FGA = first generation antipsychotic, SGA = second generation antipsychotic, SMD = standardized mean difference, M1 – M5 are drug mechanisms of action according to the “Neuroscience-based Nomenclature” (84): M1 = receptor antagonist (D2); M2 = receptor antagonist (D2, 5-HT2), M3 = receptor partial agonist (D2, 5-HT1A), M4= receptor antagonist (D2, 5-HT2, NE alpha2), M5= receptor antagonist (D2, 5-HT2) and reuptake inhibitor (NET)

Meta-regression model excluding the moderator for sponsorship

|                                                                    | <b>Coefficient<br/>(95% CrI)</b> | <b>Interpretation</b>                                                                                                                                                   | <b>Proba-<br/>bility*</b> |
|--------------------------------------------------------------------|----------------------------------|-------------------------------------------------------------------------------------------------------------------------------------------------------------------------|---------------------------|
| <b>Placebo response<br/>[10-unit increase]</b>                     | <u>-0.10</u><br>(-0.18,-0.03)    | A 10 PANSS points higher mean change score in the placebo arm would reduce the SMD on average by 0.10 units                                                             | 90.8%                     |
| <b>Publication year<br/>[ten-year increase]</b>                    | -0.02<br>(-0.07,0.07)            | A 10 years later published study would have an on average 0.02 units smaller SMD                                                                                        | 25.9%                     |
| <b>Sample size<br/>[100 participants<br/>increase]</b>             | -0.02<br>(-0.04,0.01)            | A 100 participants larger study would have an on average 0.02 units smaller SMD                                                                                         | 9.4%                      |
| <b>Mean dose<br/>[100 CPZ units<br/>increase]</b>                  | 0.01<br>(-0.02,0.04)             | A 100 CPZ units higher mean dose would increase the SMD on average by 0.01 units                                                                                        | 9.0%                      |
| <b>Baseline severity<br/>entry minimum<br/>score</b>               | -0.05<br>(-0.22,0.11)            | The SMD for studies having a minimum baseline severity entry score would be on average 0.05 units smaller than studies without a minimum baseline severity entry score. | 42.2%                     |
| <b>Summary of the above model</b> (83 studies, 19300 participants) |                                  |                                                                                                                                                                         |                           |
| <b>Heterogeneity SD</b>                                            | 0.13<br>(0.09,0.18)              | 18.8% of the heterogeneity explained                                                                                                                                    |                           |

## **Supplementary Table S8**

**Replication of the analysis by Rutherford et al. 2014 (1)**

## **Background**

A major finding in the analysis of Rutherford et al. 2014 (1) was that in addition to increasing placebo-response over time, drug-response has decreased. In our analysis, however, drug-response remained rather constant over the years. The major difference between Rutherford et al. (1) and our analysis was that they did not only use the drug groups from the placebo-controlled trials, but also from trials that compared two antipsychotics with each other, without a placebo group. Such trials have different characteristics, for example, the drop-out rates are much higher in placebo-controlled trials. We, therefore, analyzed the drug groups only from the placebo-controlled studies found by Rutherford et al. (1) to see whether the decrease in drug-response over the years could also be found in them.

## **Method**

We identified the placebo-controlled studies (1-33) in the table of included studies of Rutherford et al. 2014 (1) (note that one publication included three studies (26)). A few studies that we had not included due to other inclusion criteria (mainly depot studies) were extracted independently by at least two researchers.

We conducted three analyses:

1. A simple Spearman correlation of drug response and publication year which uses all study arms without a correction. As some studies used the BPRS and others the PANSS, we converted the BPRS/PANSS change in a standardized change score with the same method used by Rutherford et al. (1)
2. A random-effects meta-regression of drug-response with publication year as a moderator with Comprehensive meta-analysis version 2 (34). Again, the BPRS/PANSS change was converted to a standardized mean change score as in Rutherford et al. (1). If there are several active study arms, they are combined in a meta-regression, therefore the numbers are lower than in analysis 1.
3. A random effects, meta-regression of drug-response with publication year as a moderator with Comprehensive meta-analysis version 2. In studies that used the BPRS, the BPRS was converted to the PANSS using a validated conversion method as in our main analysis (Leucht et al. 2013 (35)). If there are several active study arms, they are combined in a meta-regression, therefore the numbers are lower than in analysis 1.



## Results

We did not find a significant decrease or increase of drug-reponse over the years in any of the three analyses. Moreover, it should be noted that in our more than two times larger main analysis (see Figure 4 and Table 2 in the main manuscript), drug response did not increase over the years).

### 1. Spearman correlation of drug-response (standardized mean change score) and publication year

Spearman correlation coefficient  $R = -0.029$ ,  $p = 0.83$ , 56 study arms

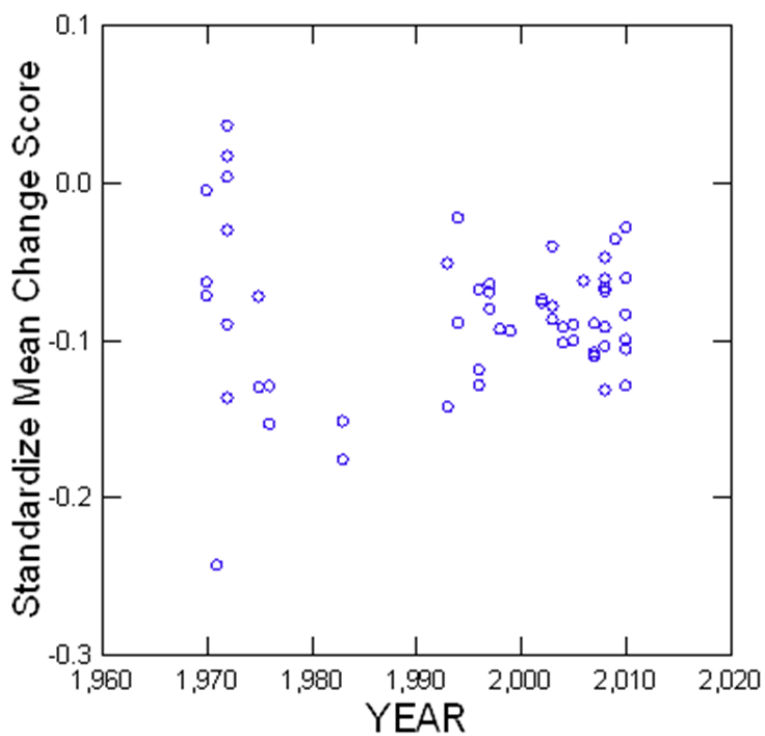

**2. Meta-regression of drug-response (standardized mean change score) and publication year**

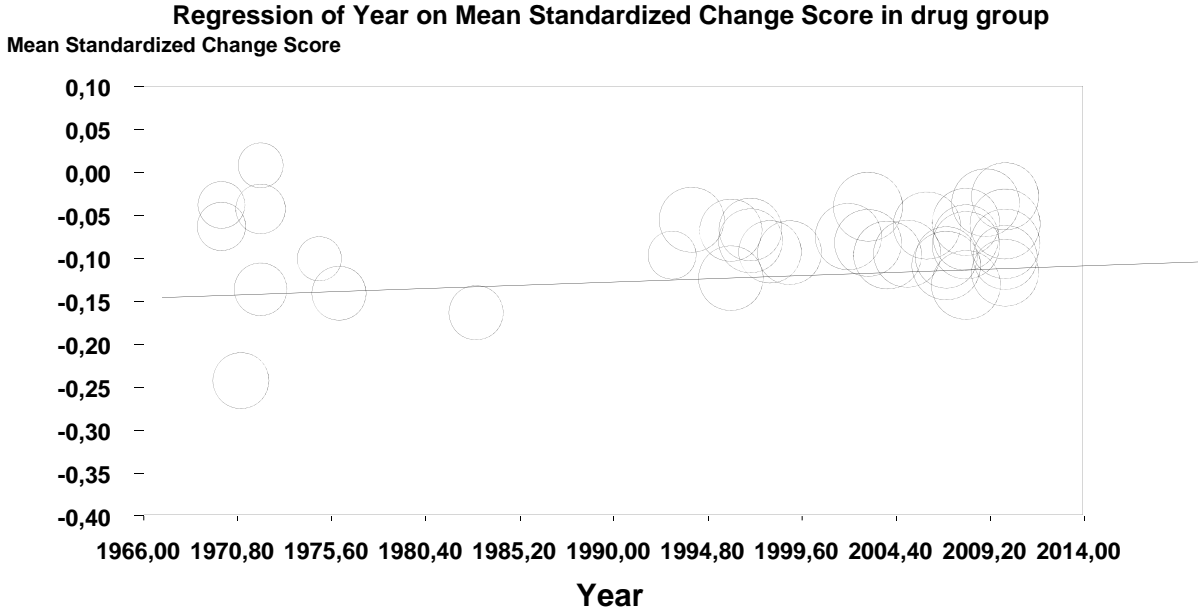

Slope = 0.00078, 95% confidence interval -0.00018 to 0.00175, p-value = 0.11

### 3. Meta-regression of drug-response (mean PANSS total score change from baseline) and publication year

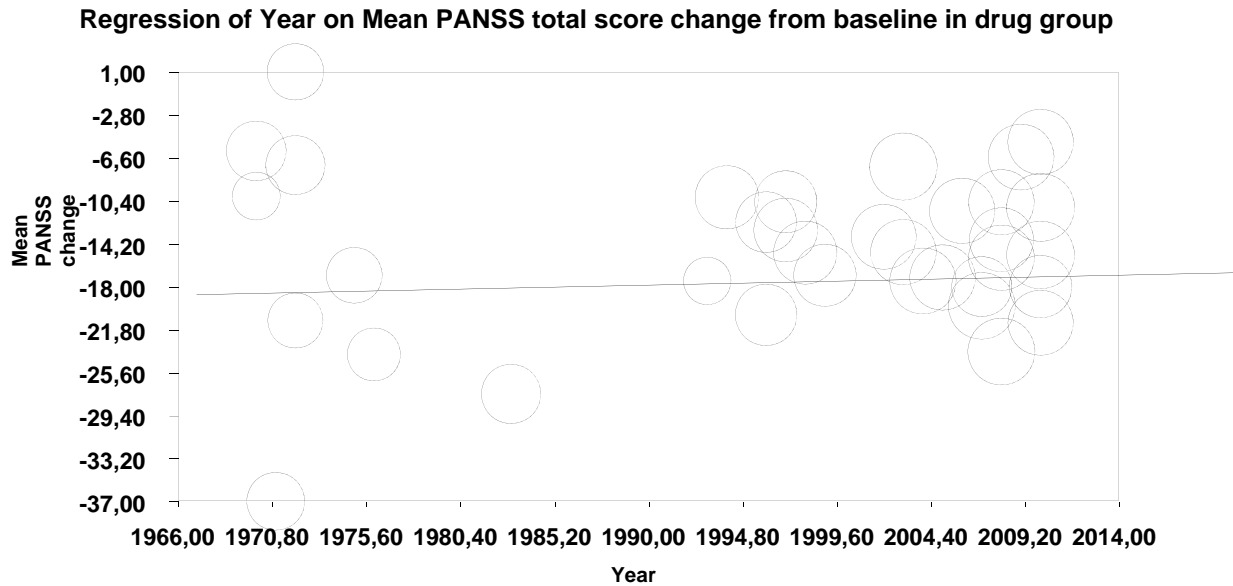

Slope = 0.03648, 95% confidence interval -0.12528 to 0.19823, p-value = 0.66

### Discussion

We could not replicate the finding of decreasing drug-response over time by Rutherford et al.(1) As in our analysis, drug-response remained stable over the year, it is only the response in the placebo groups which has gone up. This is in line with an analysis of a database available to the Food and Drug Administration.(36) As explained above, the most likely explanation is that Rutherford et al.(1) did not only use the drug groups from the placebo-controlled trials, but also from trials that compared two antipsychotics with each other, without a placebo group. Excluding the head-to-head trials from the analysis, no decreasing drug-response can be found. As a limitation, it is possible that we did not always extract the data in exactly the same way as Rutherford et al.(1) For example, in contrast to the current analysis, they also included subtherapeutic doses. Such doses are nowadays used either in dose-finding studies or as pseudo-placebos (e.g. olanzapine 1mg/day). The approach can have reduced effect sizes of recent years artificially because both dose-finding studies and studies using pseudo-placebo doses became widespread only in the 1990s. But we believe that the major difference is the inclusion of a

different type of studies in the analysis. This finding is important for the understanding of what explains the decreasing effect sizes over time.

## References

1. Rutherford BR, Pott E, Tandler JM, Wall MM, Roose SP, Lieberman JA. Placebo response in antipsychotic clinical trials: a meta-analysis. *JAMA psychiatry*. 2014;71(12):1409-21.
2. Arvanitis LA, Miller BG, group Sts. Multiple fixed doses of "Seroquel" (quetiapine) in patients with acute exacerbation of schizophrenia: a comparison with haloperidol and placebo. *BiolPsychiatry*. 1997;42:233-46.
3. Beasley CM, Sanger T, Satterlee W. Olanzapine versus placebo: results of a double-blind fixed dose olanzapine trial. *Psychopharmacology*. 1996;124:159-67.
4. Beasley CM, Tollefson GD, Tran P, Satterlee W, Sanger T, Hamilton S, et al. Olanzapine versus haloperidol and placebo. Acute phase results of the american double-blind olanzapine trial. *Neuropsychopharmacology*. 1996;14:111-23.
5. Bechelli LP, Ruffino-Netto A, Hetem G. A double-blind controlled trial of pipotiazine, haloperidol and placebo in recently-hospitalized acute schizophrenic patients. *BrazJMedBiolRes*. 1983;16(4):305-11.
6. Chouinard G, Jones B, Remington G. Canadian placebo-controlled study of fixed doses of risperidone and haloperidol in the treatment of chronic schizophrenic patients. *JClinPsychopharmacol*. 1993;13:25-40.
7. Clark ML, Ramsey HR, Ragland RE, Rahhal DK, Serafetinides EA, Costiloe JP. Chlorpromazine in chronic schizophrenia: behavioral dose-response relationships. *Psychopharmacologia*. 1970;18(3):260-70.
8. Clark ML, Huber WK, Sakata K, Fowles DC, Serafetinides EA. Molindone in chronic schizophrenia. *ClinPharmacolTher*. 1970;11(5):680-8.
9. Clark M, Huber WK, Sullivan J, Wood F, Costiloe JP. Evaluation of loxapine succinate in chronic schizophrenia. *Diseases of the Nervous System*1972. p. 783-91.
10. Clark ML, Paredes A, Costiloe JP, Wood F, Barrett A. Loxapine in newly admitted chronic schizophrenic patients. *Journal of Clinical Pharmacology*1975. p. 286-94.
11. Lauriello J, Lambert T, Andersen S, Lin D, Taylor CC, McDonnell D. An 8-week, double-blind, randomized, placebo-controlled study of olanzapine long-acting injection in acutely ill patients with schizophrenia. *J Clin Psychiatry*. 2008;69(5):790-9.
12. Clark ML, Huber WK, Kyriakopoulos AA, Ray TS, Colmore JP, Ramsey HR. Evaluation of trifluoperidol in chronic schizophrenia. *Psychopharmacologia*. 1968;12(3):193-203.
13. Cutler AJ, Marcus RN, Hardy SA, O'Donnell A, Carson WH, McQuade RD. The efficacy and safety of lower doses of aripiprazole for the treatment of patients with acute exacerbation of schizophrenia. *CNS Spectr*. 2006;11(9):691-702.
14. Cutler AJ, Tran-Johnson T, Kalali A, Astrom M, Brecher M, Meulien D. A failed 6-week, randomized, double-blind, placebo-controlled study of once-daily extended release quetiapine fumarate in patients with acute schizophrenia: lessons learned. *Psychopharmacol Bull*. 2010;43(4):37-69.
15. Daniel DG, Zimbroff DL, Potkin SG, Reeves KR, Harrigan EP, Lakshminarayanan M. Ziprasidone 80 mg/day and 160 mg/day in the acute exacerbation of schizophrenia and

schizoaffective disorder: a 6 week placebo controlled trial. *Neuropsychopharmacology* 1999. p. 491-505.

16. Davidson M, Emsley R, Kramer M, Ford L, Pan G, Lim P, et al. Efficacy, safety and early response of paliperidone extended-release tablets (paliperidone ER): results of a 6-week, randomized, placebo-controlled study. *SchizophrRes*. 2007;93(1-3):117-30.

17. Kahn RS, Schulz SC, Palazov VD, Reyes EB, Brecher M, Svensson O, et al. Efficacy and tolerability of once-daily extended release quetiapine fumarate in acute schizophrenia: a randomized, double-blind, placebo-controlled study. *JClinPsychiatry*. 2007;68(6):832-42.

18. Kane J, Canas F, Kramer M, Ford L, Gassmann-Mayer C, Lim P, et al. Treatment of schizophrenia with paliperidone extended-release tablets: a 6-week placebo-controlled trial. *SchizophrRes*. 2007;90(1-3):147-61.

19. Kane JM, Carson WH, Saha AR, McQuade RD, Ingenito GG, Zimbroff DL, et al. Efficacy and safety of aripiprazole and haloperidol versus placebo in patients with schizophrenia and schizoaffective disorder. *JClinPsychiatry*. 2002;63(9):763-71.

20. Keck P, Buffenstein A, Ferguson J, Feighner J, Jaffe W, Harrigan EP, et al. Ziprasidone 40 and 120 mg/day in the acute exacerbation of schizophrenia and schizoaffective disorder: a 4-week placebo controlled trial. *Psychopharmacology*. 1998;140(2):173-84.

21. Kramer M, Simpson G, Maciulis V, Kushner S, Vijapurkar U, Lim P, et al. Paliperidone extended-release tablets for prevention of symptom recurrence in patients with schizophrenia: a randomized, double-blind, placebo-controlled study. *Journal of Clinical Psychopharmacology*. 2007;27:6-14.

22. Marder SR, Kramer M, Ford L, Eerdeken E, Lim P, Eerdeken M, et al. Efficacy and safety of paliperidone extended-release tablets: results of a 6-week, randomized, placebo-controlled study. *BiolPsychiatry*. 2007;62(12):1363-70.

23. McIndoo MV. A controlled study of mesoridazine: an effective treatment for schizophrenia. *Southern Medical Journal* 1971. p. 592-6.

24. Meltzer HY, Cucchiari J, Silva R, Ogasa M, Phillips D, Xu J, et al. Lurasidone in the treatment of schizophrenia: a randomized, double-blind, placebo- and olanzapine-controlled study. *Am J Psychiatry*. 2011;168(9):957-67.

25. Nakamura M, Ogasa M, Guarino J, Phillips D, Severs J, Cucchiari J, et al. Lurasidone in the treatment of acute schizophrenia: a double-blind, placebo-controlled trial. *J Clin Psychiatry*. 2009;70(6):829-36.

26. Potkin SG, Litman RE, Torres R, Wolfgang CD. Efficacy of iloperidone in the treatment of schizophrenia: initial phase 3 studies. *JClinPsychopharmacol*. 2008;28(2 Suppl 1):S4-11.

27. Ritter RMT. Two studies of the effects of mesoridazine. *Journal of Clinical Pharmacology and New Drugs* 1972. p. 349-55.

28. Selman FB, McClure RF, Helwig H. Loxapine succinate: a double-blind comparison with haloperidol and placebo in acute schizophrenics. *CurrTherResClinExp*. 1976;19(6):645-52.

29. Serafetinides EA, Collins S, Clark ML. Haloperidol, clopenthixol, and chlorpromazine in chronic schizophrenia. Chemically unrelated antipsychotics as therapeutic alternatives. *JNervMentDis*. 1972;154(1):31-42.

30. Small JG, Hirsch SR, Arvanitis LA, Miller BG, Link CGG, group. Ss. Quetiapine in patients with schizophrenia. A high- and low-dose comparison with placebo. *ArchGenPsychiatry*. 1997;54:549-57.

31. Wolpert ASCMS. Thiothixene, thioridazine, and placebo in male chronic schizophrenic patients. *Clinical Pharmacology and Therapeutics* 1968. p. 456-64.

32. Kane JM, Eerdeken M, Lindenmayer JP, Keith SJ, Lesem M, Karcher K. Long-acting injectable risperidone: efficacy and safety of the first long-acting atypical antipsychotic. *Am J Psychiatry*. 2003;160(6):1125-32.
33. Gopal S, Hough DW, Xu H, Lull JM, Gassmann-Mayer C, Remmerie BM, et al. Efficacy and safety of paliperidone palmitate in adult patients with acutely symptomatic schizophrenia: a randomized, double-blind, placebo-controlled, dose-response study. *Int Clin Psychopharmacol*. 2010;25(5):247-56.
34. Borenstein M, Hedges LV, Higgins JPT, Rothstein H. *Comprehensive Meta-analysis Version 2*. wwwmeta-analysis.com. 2006.
35. Leucht S, Rothe P, Davis JM, Engel RR. Equipercentile linking of the BPRS and the PANSS. *European neuropsychopharmacology : the journal of the European College of Neuropsychopharmacology*. 2013;23(8):956-9.
36. Khin NA, Chen YF, Yang Y, Yang P, Laughren TP. Exploratory analyses of efficacy data from schizophrenia trials in support of new drug applications submitted to the US Food and Drug Administration. *J Clin Psychiatry*. 2012;73(6):856-64.

## **Supplementary Figure S4**

**Association between publication year and sample size**

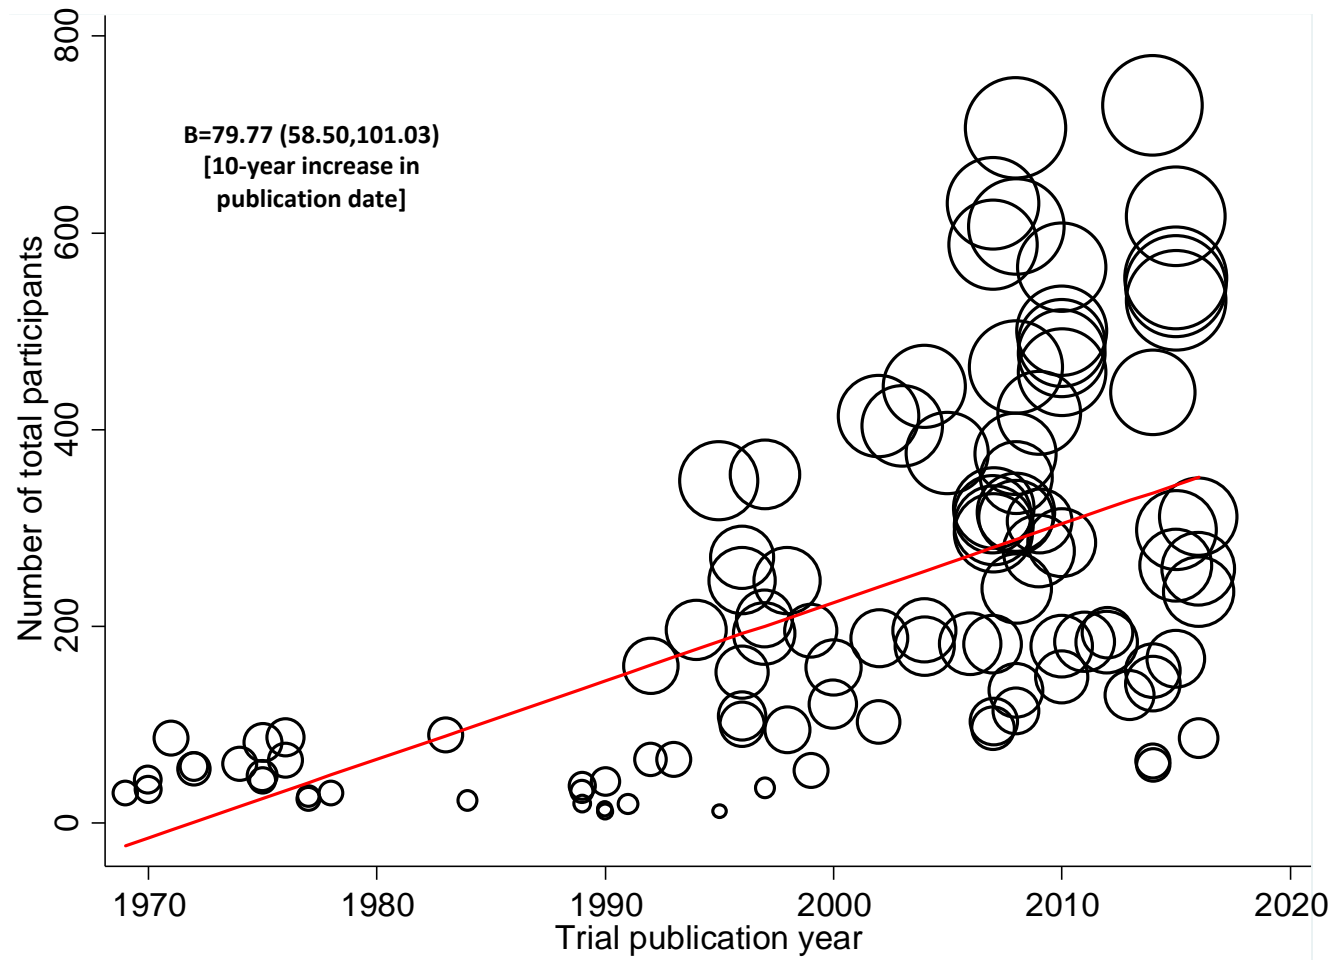

Supplement: appi.ajp.2017.16121358.ds001.pdf [file appi.ajp.2017.16121358.ds001.pdf]
